# Supplementary material for: Impact of online learning on physical activity during COVID-19 lockdown period among female undergraduate students in Saudi Arabia: a cross-sectional study
Source: PeerJ. 2024 Jan 15;12:e16579. doi: 10.7717/peerj.16579 (PMC10795523; doi:10.7717/peerj.16579)
Supplement: Data S1 [file peerj-12-16579-s001.xlsx]

## Sheet: Form responses 1
Timestamp	Do you agree to participate in this survey?	Age	marital status	specialty	Height (in cm)	Weight (in kilograms)	are you a student ?	gender	From your personal experience, did online learning affect your Physical Activity level?	From your personal experience, do you think performing Physical Activity affected your psychological status?	From your personal experience, can home sports during quarantine be an entertainment factor for you?	In the last year before COVID-19 pandemic, do you think you were participating in more physical activity?	In the last year before COVID-19 pandemic, how many hours per week did you spend in distance education?	In the last year before COVID-19 pandemic, how many hours did you spend doing household chores?	In the past year before COVID-19 pandemic, how many hours did it take for you to be present at your place of study (university, college, institute, ...etc.)?	During COVID-19 pandemic, do you think that you are participating in more physical activity now?	During COVID-19 pandemic, how many hours do you spend in distance education currently?	During COVID-19 pandemic, how many hours do you need to be present at your place of study (university, college, institute, ... etc.) currently?	During COVID-19 pandemic, how many hours did you spend on household chores currently?	in case that things improve and return to normal, how long do you need to adapt and practice your activity normally again?	How many hours do you usually sleep per night?	Do you work or study at the moment? Refers to full time, half time and volunteer work.	What is your normal activity level at your daily occupation (work, studies or equivalent)?	Usually, how do you go to and from work, study or any other daily occupation?	number of times per week [walk]	Number of times per week [bike or bus rides]	Number of times per week [by car or taxi]	number of times per week [other]	Time, one way per day (walking)	Time, one way per day (cycling)	Time, one way per day (By car or taxi)	Time, one way per day (other)	How many days per week do you dedicate time to the following leisure time activities and how much time do you spend per day on the activity?	Number of days per week (Using the computer, reading e-mails, playing computer games, play station, Xbox etc.)	Number of days per week (Sitting reading, writing, sewing etc.)	Number of days per week (Doing household chores (e.g. cleaning, laundry, child care, gardening etc.)	Number of days per week (Shopping or other errands)	Number of days per week [المشي ( للتسلية )]	Number of days per week (Walking, Nordic walking, walking a dog (not as transport to daily occupation))	Total time per day (Watching TV/DVDs etc.)	Total time per day (Using the computer, reading e-mails, playing computer games, play station, Xbox etc.)	Total time per day (Sitting reading, writing, sewing etc.)	Total time per day (Doing household chores (e.g. cleaning, laundry, child care, gardening etc.))	Total time per day (Shopping or other errands)	Total time per day (Walking, Nordic walking, walking a dog (not as transport to daily occupation))	Total time per day (Bicycling (not as transport to daily occupation))	Do you exercise or participate in any sporting activities regularly?	How often do you participate in Aerobics or cardio fitness class	How often do you participate in Jogging, running or orienteering
2021-02-09 20:21:32	Yes	18-24	Single	Health sciences (medicine, pharmacy, applied medical sciences, dentistry)	162	58	Yes	Female	Almost	Yes, definitely	Almost	Yes, definitely	Less than 15 hours (about 3 hours per day)	Less than 15 hours (about 3 hours per day)	26-30 hours (approximately 6 hours per day)	no never	26-30 hours (approximately 6 hours per day)	Less than 15 hours (about 3 hours per day)	Less than 15 hours (about 3 hours per day)	less than a month	6 hours	No	Almost sitting	By car or taxi	1	I don't know	7	I don't know	half an hour	I don't know	2 to 4 hours	I don't know	4	6	5	4	3	1	I don't know	4 hours to 8 hours	2 to 4 hours	2 to 4 hours	From an hour to less than two hours	From an hour to less than two hours	I don't know	I don't know	No	I don't know	I don't know
2021-02-09 20:25:07	Yes	18-24	Single	Health sciences (medicine, pharmacy, applied medical sciences, dentistry)	154	56	Yes	Female	Yes, definitely	Yes, definitely	Almost	rarely	Less than 15 hours (about 3 hours per day)	Less than 15 hours (about 3 hours per day)	26-30 hours (approximately 6 hours per day)	Almost	26-30 hours (approximately 6 hours per day)	Less than 15 hours (about 3 hours per day)	Less than 15 hours (about 3 hours per day)	less than a month	6 hours	Yes	A combination of sitting and standing up	By car or taxi	2	I don't know	5	I don't know	I don't know	I don't know	half an hour	I don't know	I don't know	6	1	3	2	2	I don't know	I don't know	4 hours to 8 hours	I don't know	half an hour	From an hour to less than two hours	From an hour to less than two hours	I don't know	Yes	2-3 times a week	I don't know
2021-02-09 20:28:13	Yes	18-24	Single	Health sciences (medicine, pharmacy, applied medical sciences, dentistry)	159	55	Yes	Female	Yes, definitely	Yes, definitely	rarely	sometimes	Less than 15 hours (about 3 hours per day)	21-25 hours (approximately 5 hours per day)	26-30 hours (approximately 6 hours per day)	sometimes	26-30 hours (approximately 6 hours per day)	Less than 15 hours (about 3 hours per day)	21-25 hours (approximately 5 hours per day)	less than a month	7 hours	No	Almost sitting	By car or taxi	5	1	3	1	2 to 4 hours	half an hour	4 hours to 8 hours	half an hour	7	5	2	6	1	4	1	more than 8 hours	more than 8 hours	half an hour	I don't know	From an hour to less than two hours	2 to 4 hours	I don't know	No	1-3 times a month	I don't know
2021-02-09 20:36:29	Yes	18-24	Single	Health sciences (medicine, pharmacy, applied medical sciences, dentistry)	160	40	Yes	Female	Yes, definitely	Almost	Almost	Yes, definitely	Less than 15 hours (about 3 hours per day)	21-25 hours (approximately 5 hours per day)	Less than 15 hours (about 3 hours per day)	rarely	26-30 hours (approximately 6 hours per day)	Less than 15 hours (about 3 hours per day)	21-25 hours (approximately 5 hours per day)	less than a month	10 hours or more	Yes	Almost sitting	By car or taxi	3	1	4	I don't know	From an hour to less than two hours	I don't know	2 to 4 hours	I don't know	6	7	1	3	1	4	I don't know	4 hours to 8 hours	more than 8 hours	I don't know	From an hour to less than two hours	From an hour to less than two hours	half an hour	I don't know	No	1-3 times a month	1-3 times a month
2021-02-09 20:46:37	Yes	18-24	Single	Health sciences (medicine, pharmacy, applied medical sciences, dentistry)	166	58	Yes	Female	Yes, definitely	Almost	Almost	Yes, definitely	Less than 15 hours (about 3 hours per day)	Less than 15 hours (about 3 hours per day)	26-30 hours (approximately 6 hours per day)	rarely	21-25 hours (approximately 5 hours per day)	Less than 15 hours (about 3 hours per day)	15-20 hours (approximately 4 hours per day)	less than a month	9 hours	Yes	Almost sitting	By car or taxi	I don't know	I don't know	6	I don't know	I don't know	I don't know	From an hour to less than two hours	I don't know	7	6	I don't know, I don't want to answer	5	2	I don't know	I don't know	4 hours to 8 hours	4 hours to 8 hours	I don't know	From an hour to less than two hours	From an hour to less than two hours	I don't know	I don't know	No	1-3 times a month	I don't know
2021-02-09 21:48:21	Yes	18-24	Single	Health sciences (medicine, pharmacy, applied medical sciences, dentistry)	157	45	Yes	Female	sometimes	Almost	rarely	no never	Less than 15 hours (about 3 hours per day)	Less than 15 hours (about 3 hours per day)	26-30 hours (approximately 6 hours per day)	sometimes	21-25 hours (approximately 5 hours per day)	Less than 15 hours (about 3 hours per day)	Less than 15 hours (about 3 hours per day)	7-12 months	Less than 5 hours	Yes	Almost sitting	By car or taxi	5	I don't know	5	I don't know	I don't know	I don't know	half an hour	I don't know	4	4	I don't know	2	I don't know	4	I don't know	From an hour to less than two hours	4 hours to 8 hours	I don't know	2 to 4 hours	I don't know	From an hour to less than two hours	I don't know	No	I don't know	I don't know
2021-02-10 17:56:43	Yes	more than 27	Single	Health sciences (medicine, pharmacy, applied medical sciences, dentistry)	164	68	Yes	Female	Yes, definitely	Yes, definitely	Yes, definitely	Yes, definitely	Less than 15 hours (about 3 hours per day)	15-20 hours (approximately 4 hours per day)	26-30 hours (approximately 6 hours per day)	Yes, definitely	Less than 15 hours (about 3 hours per day)	21-25 hours (approximately 5 hours per day)	Less than 15 hours (about 3 hours per day)	less than a month	8 hours	Yes	Almost sitting	By car or taxi	I don't know	I don't know	3	I don't know	I don't know	I don't know	half an hour	I don't know	6	7	5	7	2	2	I don't know	From an hour to less than two hours	4 hours to 8 hours	From an hour to less than two hours	2 to 4 hours	From an hour to less than two hours	I don't know	I don't know	Yes	once a week	I don't know
2021-02-14 16:52:21	Yes	18-24	Single	Health sciences (medicine, pharmacy, applied medical sciences, dentistry)	159	55	Yes	Female	Almost	Yes, definitely	rarely	Almost	Less than 15 hours (about 3 hours per day)	21-25 hours (approximately 5 hours per day)	26-30 hours (approximately 6 hours per day)	no never	26-30 hours (approximately 6 hours per day)	Less than 15 hours (about 3 hours per day)	21-25 hours (approximately 5 hours per day)	less than a month	6 hours	No	Almost sitting	By car or taxi	1	1	5	I don't know	half an hour	half an hour	4 hours to 8 hours	half an hour	6	6	6	7	1	2	I don't know	4 hours to 8 hours	2 to 4 hours	half an hour	more than 8 hours	half an hour	half an hour	half an hour	No	1-3 times a month	1-3 times a month
2021-02-15 15:24:41	Yes	18-24	Single	Health sciences (medicine, pharmacy, applied medical sciences, dentistry)	159	55	Yes	Female	Almost	Yes, definitely	rarely	Almost	Less than 15 hours (about 3 hours per day)	21-25 hours (approximately 5 hours per day)	26-30 hours (approximately 6 hours per day)	no never	26-30 hours (approximately 6 hours per day)	Less than 15 hours (about 3 hours per day)	21-25 hours (approximately 5 hours per day)	less than a month	6 hours	No	Almost sitting	By car or taxi	1	1	5	I don't know	half an hour	half an hour	4 hours to 8 hours	half an hour	6	6	6	7	1	2	I don't know	4 hours to 8 hours	2 to 4 hours	half an hour	more than 8 hours	half an hour	half an hour	half an hour	No	1-3 times a month	1-3 times a month
2021-02-17 18:25:53	Yes	18-24	Single	Health sciences (medicine, pharmacy, applied medical sciences, dentistry)	157	56	Yes	Female	Yes, definitely	Yes, definitely	sometimes	Yes, definitely	Less than 15 hours (about 3 hours per day)	Less than 15 hours (about 3 hours per day)	more than 30 hours (more than 6 hours per day)	rarely	Less than 15 hours (about 3 hours per day)	26-30 hours (approximately 6 hours per day)	Less than 15 hours (about 3 hours per day)	less than a month	7 hours	No	A combination of sitting and standing up	By car or taxi	I don't want to answer	I don't want to answer	2	I don't want to answer	I don't want to answer	I don't want to answer	half an hour	I don't want to answer	1	7	1	1	1	1	1	2 to 4 hours	more than 8 hours	From an hour to less than two hours	From an hour to less than two hours	From an hour to less than two hours	half an hour	half an hour	No	once a week	1-3 times a month
2021-02-17 18:36:23	Yes	18-24	Single	Health sciences (medicine, pharmacy, applied medical sciences, dentistry)	163	54	Yes	Female	Almost	Yes, definitely	Yes, definitely	no never	Less than 15 hours (about 3 hours per day)	Less than 15 hours (about 3 hours per day)	more than 30 hours (more than 6 hours per day)	Almost	more than 30 hours (more than 6 hours per day)	more than 30 hours (more than 6 hours per day)	Less than 15 hours (about 3 hours per day)	2-3 months	I don't want to answer	Yes	Almost sitting	By car or taxi	1	1	2	1	half an hour	half an hour	half an hour	half an hour	1	2	1	3	1	1	1	half an hour	half an hour	half an hour	half an hour	half an hour	half an hour	half an hour	No	once a week	1-3 times a month, once a week
2021-02-17 18:38:17	Yes	18-24	Single	Health sciences (medicine, pharmacy, applied medical sciences, dentistry)	159	45	Yes	Female	Yes, definitely	Almost	Almost	rarely	15-20 hours (approximately 4 hours per day)	Less than 15 hours (about 3 hours per day)	26-30 hours (approximately 6 hours per day)	Almost	more than 30 hours (more than 6 hours per day)	more than 30 hours (more than 6 hours per day)	Less than 15 hours (about 3 hours per day)	less than a month	7 hours	Yes	Almost standing and walking	By car or taxi	4	1	1	1	From an hour to less than two hours	I don't know	I don't know	I don't know	7	7	3	I don't know	5	5	5	4 hours to 8 hours	2 to 4 hours	From an hour to less than two hours	2 to 4 hours	From an hour to less than two hours	From an hour to less than two hours	half an hour	Yes	1-3 times a month	1-3 times a month
2021-02-17 18:38:55	Yes	18-24	Single	Health sciences (medicine, pharmacy, applied medical sciences, dentistry)	155	45	Yes	Female	Yes, definitely	sometimes	Yes, definitely	rarely	Less than 15 hours (about 3 hours per day)	15-20 hours (approximately 4 hours per day)	26-30 hours (approximately 6 hours per day)	rarely	21-25 hours (approximately 5 hours per day)	Less than 15 hours (about 3 hours per day)	15-20 hours (approximately 4 hours per day)	7-12 months	10 hours or more	Yes	A combination of sitting and standing up	By car or taxi	3	1	1	7	half an hour	2 to 4 hours	2 to 4 hours	From an hour to less than two hours	1	1	3	3	4	1	1	half an hour	4 hours to 8 hours	2 to 4 hours	4 hours to 8 hours	4 hours to 8 hours	4 hours to 8 hours	4 hours to 8 hours	Yes	once a week	once a week
2021-02-17 18:40:17	Yes	18-24	Single	Health sciences (medicine, pharmacy, applied medical sciences, dentistry)	153	54	Yes	Female	Yes, definitely	Yes, definitely	Almost	Yes, definitely	Less than 15 hours (about 3 hours per day)	Less than 15 hours (about 3 hours per day)	26-30 hours (approximately 6 hours per day)	no never	26-30 hours (approximately 6 hours per day)	Less than 15 hours (about 3 hours per day)	Less than 15 hours (about 3 hours per day)	less than a month	8 hours	I don't know	Almost sitting	By car or taxi	I don't want to answer	I don't want to answer	4	I don't want to answer	I don't want to answer	I don't want to answer	half an hour	I don't want to answer	1	4	I don't want to answer	2	2	2	I don't want to answer	I don't want to answer	2 to 4 hours	I don't want to answer	half an hour	2 to 4 hours	half an hour	I don't want to answer	Yes	4-5 times a week	once a week
2021-02-17 18:40:20	Yes	18-24	Single	Other	160	37	Yes	Female	Yes, definitely	Almost	Almost	rarely	Less than 15 hours (about 3 hours per day)	Less than 15 hours (about 3 hours per day)	Less than 15 hours (about 3 hours per day)	rarely	26-30 hours (approximately 6 hours per day)	Less than 15 hours (about 3 hours per day)	Less than 15 hours (about 3 hours per day)	2-3 months	I don't know	I don't know	A combination of sitting and standing up	By car or taxi	1	1	1	1	half an hour	half an hour	half an hour	half an hour	1	1	1	1	1	1	1	half an hour	half an hour	half an hour	half an hour	half an hour	half an hour	half an hour	No	once a week	1-3 times a month
2021-02-17 18:40:28	Yes	18-24	Single	Health sciences (medicine, pharmacy, applied medical sciences, dentistry)	158	41	Yes	Female	Yes, definitely	Yes, definitely	sometimes	Almost	15-20 hours (approximately 4 hours per day)	Less than 15 hours (about 3 hours per day)	Less than 15 hours (about 3 hours per day)	sometimes	21-25 hours (approximately 5 hours per day)	Less than 15 hours (about 3 hours per day)	Less than 15 hours (about 3 hours per day)	2-3 months	8 hours	Yes	Almost sitting	By car or taxi	I don't know	I don't know	5	I don't know	I don't know	I don't know	half an hour	I don't know	7	7	I don't know	I don't know	5	4	I don't know	I don't know	I don't know	I don't know	I don't know	I don't know	I don't know	I don't know	No	1-3 times a month	1-3 times a month
2021-02-17 18:43:15	Yes	18-24	Single	Health sciences (medicine, pharmacy, applied medical sciences, dentistry)	155	78	Yes	Female	Yes, definitely	Yes, definitely	Almost	Yes, definitely	Less than 15 hours (about 3 hours per day)	21-25 hours (approximately 5 hours per day)	26-30 hours (approximately 6 hours per day)	sometimes	26-30 hours (approximately 6 hours per day)	Less than 15 hours (about 3 hours per day)	more than 30 hours (more than 6 hours per day)	2-3 months	6 hours	Yes	A combination of sitting and standing up	By car or taxi	1	1	5	1	half an hour	half an hour	half an hour	half an hour	4	6	2	1	1	3	1	2 to 4 hours	4 hours to 8 hours	From an hour to less than two hours	half an hour	half an hour	half an hour	half an hour	No	1-3 times a month	once a week
2021-02-17 18:43:55	Yes	18-24	Single	Health sciences (medicine, pharmacy, applied medical sciences, dentistry)	166	51	Yes	Female	Yes, definitely	Yes, definitely	Almost	Yes, definitely	Less than 15 hours (about 3 hours per day)	15-20 hours (approximately 4 hours per day)	more than 30 hours (more than 6 hours per day)	no never	26-30 hours (approximately 6 hours per day)	Less than 15 hours (about 3 hours per day)	15-20 hours (approximately 4 hours per day)	2-3 months	Less than 5 hours	Yes	Almost sitting	By car or taxi	2	1	I don't want to answer	I don't want to answer	half an hour	half an hour	I don't want to answer	I don't want to answer	7	6	5	7	2	1	1	4 hours to 8 hours	2 to 4 hours	From an hour to less than two hours	2 to 4 hours	From an hour to less than two hours	half an hour	half an hour	Yes	2-3 times a week	once a week
2021-02-17 18:44:09	Yes	18-24	Single	Health sciences (medicine, pharmacy, applied medical sciences, dentistry)	147	46	Yes	Female	Yes, definitely	Almost	sometimes	sometimes	Less than 15 hours (about 3 hours per day)	Less than 15 hours (about 3 hours per day)	21-25 hours (approximately 5 hours per day)	no never	26-30 hours (approximately 6 hours per day)	15-20 hours (approximately 4 hours per day)	Less than 15 hours (about 3 hours per day)	less than a month	Less than 5 hours	Yes	Almost sitting	By car or taxi	I don't know	I don't know	3	I don't know	From an hour to less than two hours	I don't know	half an hour	I don't know	3	7	I don't want to answer	3	I don't know	1	I don't know	half an hour	4 hours to 8 hours	I don't know	half an hour	I don't know	I don't know	I don't know	No	I don't want to answer	1-3 times a month
2021-02-17 18:45:45	Yes	18-24	Single	Other	160	49	Yes	Female	no never	Almost	no never	no never	15-20 hours (approximately 4 hours per day)	21-25 hours (approximately 5 hours per day)	Less than 15 hours (about 3 hours per day)	no never	21-25 hours (approximately 5 hours per day)	Less than 15 hours (about 3 hours per day)	Less than 15 hours (about 3 hours per day)	less than a month	10 hours or more	No	Almost sitting	Other	1	1	1	1	half an hour	half an hour	half an hour	half an hour	4	4	1	1	1	1	1	more than 8 hours	more than 8 hours	half an hour	half an hour	half an hour	half an hour	half an hour	No	1-3 times a month, I don't know	1-3 times a month, I don't know
2021-02-17 18:47:04	Yes	18-24	Single	Health sciences (medicine, pharmacy, applied medical sciences, dentistry)	I think 160	45	Yes	Female	Yes, definitely	Yes, definitely	Yes, definitely	Almost	Less than 15 hours (about 3 hours per day)	15-20 hours (approximately 4 hours per day)	15-20 hours (approximately 4 hours per day)	Yes, definitely	Less than 15 hours (about 3 hours per day)	Less than 15 hours (about 3 hours per day)	Less than 15 hours (about 3 hours per day)	2-3 months	6 hours	Yes	Almost sitting	By car or taxi	I don't know	I don't know	7	I don't want to answer	I don't know	I don't know	From an hour to less than two hours	I don't know, I don't want to answer	3	6 to 7	1	4	6	3	5	From an hour to less than two hours	more than 8 hours	2 to 4 hours	4 hours to 8 hours	2 to 4 hours	4 hours to 8 hours	4 hours to 8 hours	No	I don't know	1-3 times a month
2021-02-17 18:47:28	Yes	18-24	Single	Health sciences (medicine, pharmacy, applied medical sciences, dentistry)	157	46	Yes	Female	Yes, definitely	Yes, definitely	rarely	Yes, definitely	Less than 15 hours (about 3 hours per day)	Less than 15 hours (about 3 hours per day)	26-30 hours (approximately 6 hours per day)	no never	more than 30 hours (more than 6 hours per day)	Less than 15 hours (about 3 hours per day)	Less than 15 hours (about 3 hours per day)	2-3 months	8 hours	Yes	A combination of sitting and standing up	By car or taxi	2	I don't know	7	I don't know	From an hour to less than two hours	I don't know	half an hour	I don't know	7	5	1	2	3	2	I don't know	2 to 4 hours	From an hour to less than two hours	From an hour to less than two hours	From an hour to less than two hours	From an hour to less than two hours	From an hour to less than two hours	I don't know	No	I don't know	I don't know
2021-02-17 18:49:31	Yes	18-24	Single	Health sciences (medicine, pharmacy, applied medical sciences, dentistry)	163	53	Yes	Female	Yes, definitely	Yes, definitely	Yes, definitely	Almost	Less than 15 hours (about 3 hours per day)	Less than 15 hours (about 3 hours per day)	26-30 hours (approximately 6 hours per day)	no never	26-30 hours (approximately 6 hours per day)	26-30 hours (approximately 6 hours per day)	Less than 15 hours (about 3 hours per day)	less than a month	8 hours	Yes	A combination of sitting and standing up	By car or taxi	1	1	1 to 3	1	half an hour	half an hour	half an hour	half an hour	1	7	1	1	1	1	1	half an hour	more than 8 hours	half an hour	half an hour	half an hour	half an hour	half an hour	No	1-3 times a month	1-3 times a month
2021-02-17 18:50:20	Yes	18-24	Single	Health sciences (medicine, pharmacy, applied medical sciences, dentistry)	160	74	Yes	Female	sometimes	Yes, definitely	Yes, definitely	Almost	15-20 hours (approximately 4 hours per day)	21-25 hours (approximately 5 hours per day)	15-20 hours (approximately 4 hours per day)	sometimes	15-20 hours (approximately 4 hours per day)	21-25 hours (approximately 5 hours per day)	15-20 hours (approximately 4 hours per day)	2-3 months	6 hours	Yes	A combination of sitting and standing up	By car or taxi	4	1	1	1	From an hour to less than two hours	half an hour	half an hour	half an hour	2	2	1	3	1	3	1	From an hour to less than two hours	half an hour	From an hour to less than two hours	half an hour	half an hour	half an hour	half an hour	Yes	2-3 times a week	2-3 times a week
2021-02-17 18:52:54	Yes	18-24	Single	Other	160	48	Yes	Female	sometimes	Almost	Yes, definitely	no never	Less than 15 hours (about 3 hours per day)	Less than 15 hours (about 3 hours per day)	26-30 hours (approximately 6 hours per day)	Almost	21-25 hours (approximately 5 hours per day)	Less than 15 hours (about 3 hours per day)	26-30 hours (approximately 6 hours per day)	less than a month	6 hours	Yes	A combination of sitting and standing up	By car or taxi	I don't know	I don't know	7	I don't know	half an hour	I don't know	more	half an hour, I don't know	5	4	4	3	3	5	1	4 hours to 8 hours	2 to 4 hours	2 to 4 hours	2 to 4 hours	From an hour to less than two hours	From an hour to less than two hours	half an hour	No	6-7 times a week	once a week
2021-02-17 18:53:18	Yes	under 18	Single	Other	179	65	Yes	Male	no never	Yes, definitely	Yes, definitely	Yes, definitely	Less than 15 hours (about 3 hours per day)	Less than 15 hours (about 3 hours per day)	Less than 15 hours (about 3 hours per day)	Yes, definitely	Less than 15 hours (about 3 hours per day)	Less than 15 hours (about 3 hours per day)	15-20 hours (approximately 4 hours per day)	2-3 months	10 hours or more	Yes	A combination of sitting and standing up	By car or taxi	4	3 to 4	2	4	From an hour to less than two hours	4 hours to 8 hours	2 to 4 hours	4 hours to 8 hours	2	3	2	1	3	3	4	From an hour to less than two hours	From an hour to less than two hours	4 hours to 8 hours	half an hour	From an hour to less than two hours	From an hour to less than two hours	2 to 4 hours	No	once a week	2-3 times a week
2021-02-17 18:54:26	Yes	18-24	Single	Other	152	38	Yes	Female	Almost	no never	sometimes	Almost	21-25 hours (approximately 5 hours per day)	Less than 15 hours (about 3 hours per day)	more than 30 hours (more than 6 hours per day)	sometimes	more than 30 hours (more than 6 hours per day)	Less than 15 hours (about 3 hours per day)	15-20 hours (approximately 4 hours per day)	less than a month	Less than 5 hours	Yes	Almost sitting	Bike or bus rides	1	4	1	1	4 hours to 8 hours	From an hour to less than two hours	half an hour	half an hour	1	4	3	4	1	3	1	2 to 4 hours	4 hours to 8 hours	half an hour	2 to 4 hours	half an hour	half an hour	half an hour	Yes	4-5 times a week	1-3 times a month
2021-02-17 18:56:32	Yes	18-24	Single	Other	156	53	Yes	Female	Yes, definitely	Yes, definitely	no never	sometimes	Less than 15 hours (about 3 hours per day)	15-20 hours (approximately 4 hours per day)	more than 30 hours (more than 6 hours per day)	sometimes	21-25 hours (approximately 5 hours per day)	Less than 15 hours (about 3 hours per day)	21-25 hours (approximately 5 hours per day)	2-3 months	8 hours	No	Almost sitting	By car or taxi	3	6	3	1	half an hour	2 to 4 hours	2 to 4 hours	half an hour	6	7	1	5	4	1	1	more than 8 hours	more than 8 hours	half an hour	4 hours to 8 hours	From an hour to less than two hours	half an hour	half an hour	No	1-3 times a month	1-3 times a month
2021-02-17 19:04:42	Yes	25-27	Married	Humanities (media, languages, law....etc)	155	58	No	Female	Yes, definitely	no never	Yes, definitely	Yes, definitely	Less than 15 hours (about 3 hours per day)	Less than 15 hours (about 3 hours per day)	Less than 15 hours (about 3 hours per day)	Yes, definitely	Less than 15 hours (about 3 hours per day)	Less than 15 hours (about 3 hours per day)	Less than 15 hours (about 3 hours per day)	less than a month	7 hours	No	Some physical activity	By car or taxi	4	4	4 to 7	4	half an hour	half an hour	half an hour	half an hour	3	3	3	3 to 6	3	3	3	From an hour to less than two hours	From an hour to less than two hours	From an hour to less than two hours	4 hours to 8 hours	From an hour to less than two hours	2 to 4 hours	2 to 4 hours	Yes	once a week	1-3 times a month
2021-02-17 19:05:52	Yes	18-24	Single	Humanities (media, languages, law....etc)	179	77	Yes	Male	sometimes	Yes, definitely	sometimes	Yes, definitely	Less than 15 hours (about 3 hours per day)	Less than 15 hours (about 3 hours per day)	21-25 hours (approximately 5 hours per day)	sometimes	26-30 hours (approximately 6 hours per day)	Less than 15 hours (about 3 hours per day)	Less than 15 hours (about 3 hours per day)	less than a month	8 hours	No	Almost sitting	By car or taxi	I don't want to answer	I don't want to answer	7	I don't want to answer	I don't want to answer	I don't want to answer	more than 8 hours	I don't want to answer	7	7	7	7	7	7	7	more than 8 hours	more than 8 hours	more than 8 hours	more than 8 hours	more than 8 hours	more than 8 hours	more than 8 hours	Yes	1-3 times a month	1-3 times a month
2021-02-17 19:06:22	Yes	25-27	Single	Other	185	84	No	Male	Almost	sometimes	sometimes	Yes, definitely	Less than 15 hours (about 3 hours per day)	Less than 15 hours (about 3 hours per day)	more than 30 hours (more than 6 hours per day)	sometimes	Less than 15 hours (about 3 hours per day)	more than 30 hours (more than 6 hours per day)	Less than 15 hours (about 3 hours per day)	less than a month	6 hours	Yes	A combination of sitting and standing up	By car or taxi	I don't know	I don't know	7	I don't know	I don't know	I don't know	half an hour, From an hour to less than two hours	I don't know	5	5	I don't know	3	3	2	2	2 to 4 hours	4 hours to 8 hours	From an hour to less than two hours	From an hour to less than two hours	2 to 4 hours	From an hour to less than two hours	half an hour	Yes	I don't know	I don't know
2021-02-17 19:06:54	Yes	18-24	Single	Health sciences (medicine, pharmacy, applied medical sciences, dentistry)	154	49	Yes	Female	Yes, definitely	Yes, definitely	Yes, definitely	sometimes	Less than 15 hours (about 3 hours per day)	Less than 15 hours (about 3 hours per day)	more than 30 hours (more than 6 hours per day)	rarely	more than 30 hours (more than 6 hours per day)	Less than 15 hours (about 3 hours per day)	Less than 15 hours (about 3 hours per day)	less than a month	8 hours	Yes	Almost sitting	By car or taxi	I don't want to answer	I don't want to answer	5	I don't want to answer	I don't want to answer	I don't want to answer	From an hour to less than two hours	I don't want to answer	I don't want to answer	7	7	I don't want to answer	1	3	I don't want to answer	I don't want to answer	more than 8 hours	2 to 4 hours	I don't want to answer	half an hour	half an hour	I don't want to answer	No	1-3 times a month	6-7 times a week
2021-02-17 19:07:49	Yes	18-24	Single	Humanities (media, languages, law....etc)	164	58	Yes	Female	Almost	rarely	Yes, definitely	Yes, definitely	Less than 15 hours (about 3 hours per day)	Less than 15 hours (about 3 hours per day)	26-30 hours (approximately 6 hours per day)	sometimes	more than 30 hours (more than 6 hours per day)	Less than 15 hours (about 3 hours per day)	Less than 15 hours (about 3 hours per day)	less than a month	9 hours	Yes	Almost sitting	By car or taxi	1	1	4	1	From an hour to less than two hours	half an hour, From an hour to less than two hours	half an hour	half an hour	1	2	3	4	1	2	4	more than 8 hours	2 to 4 hours	half an hour	half an hour	From an hour to less than two hours	half an hour	half an hour	No	I don't know	once a week
2021-02-17 19:09:30	Yes	18-24	Single	Other	154	85	Yes	Female	Yes, definitely	Yes, definitely	rarely	Yes, definitely	Less than 15 hours (about 3 hours per day)	26-30 hours (approximately 6 hours per day)	26-30 hours (approximately 6 hours per day)	no never	more than 30 hours (more than 6 hours per day)	Less than 15 hours (about 3 hours per day)	Less than 15 hours (about 3 hours per day)	less than a month	6 hours	Yes	Almost sitting	By car or taxi	1	1	1	1	half an hour	half an hour	half an hour	half an hour	4	4	2	1	1	1	1	From an hour to less than two hours	From an hour to less than two hours	From an hour to less than two hours	half an hour	half an hour	half an hour	half an hour	No	1-3 times a month	1-3 times a month
2021-02-17 19:09:45	Yes	25-27	Married	Other	165	72	Yes	Female	no never	Yes, definitely	Yes, definitely	Almost	Less than 15 hours (about 3 hours per day)	Less than 15 hours (about 3 hours per day)	Less than 15 hours (about 3 hours per day)	sometimes	Less than 15 hours (about 3 hours per day)	Less than 15 hours (about 3 hours per day)	Less than 15 hours (about 3 hours per day)	less than a month	8 hours	No	A combination of sitting and standing up	By car or taxi	1	1	1	1	half an hour	half an hour	half an hour	half an hour	4	3	1	4	2	4	1	2 to 4 hours	half an hour	half an hour	From an hour to less than two hours	From an hour to less than two hours	From an hour to less than two hours	half an hour	No	1-3 times a month	1-3 times a month
2021-02-17 19:09:56	Yes	18-24	Single	Health sciences (medicine, pharmacy, applied medical sciences, dentistry)	158	52	Yes	Female	sometimes	Yes, definitely	Yes, definitely	sometimes	Less than 15 hours (about 3 hours per day)	Less than 15 hours (about 3 hours per day)	26-30 hours (approximately 6 hours per day)	Yes, definitely	more than 30 hours (more than 6 hours per day)	15-20 hours (approximately 4 hours per day)	Less than 15 hours (about 3 hours per day)	less than a month	7 hours	Yes	Almost sitting	By car or taxi	7	I don't know	7	I don't want to answer	2 to 4 hours	I don't want to answer	half an hour	I don't want to answer	6 to 7	1	I don't know	2 to 4	I don't know	7	I don't know	half an hour	I don't want to answer	From an hour to less than two hours	half an hour	I don't want to answer	2 to 4 hours	I don't want to answer	I don't know	I don't know	I don't know
2021-02-17 19:11:08	Yes	18-24	Single	Other	157	55	Yes	Female	no never	Yes, definitely	Yes, definitely	no never	Less than 15 hours (about 3 hours per day)	Less than 15 hours (about 3 hours per day)	more than 30 hours (more than 6 hours per day)	no never	more than 30 hours (more than 6 hours per day)	Less than 15 hours (about 3 hours per day)	15-20 hours (approximately 4 hours per day)	more than 12 months	I don't know	Yes	Almost sitting	By car or taxi	5	1	4	4	From an hour to less than two hours	half an hour	half an hour	half an hour	I don't know	3 to 7	I don't want to answer	7	1	7	I don't know	half an hour	half an hour	half an hour	half an hour	half an hour	half an hour	half an hour	No	I don't know	I don't know
2021-02-17 19:11:21	Yes	18-24	Single	Other	156	60	Yes	Female	Yes, definitely	Yes, definitely	Yes, definitely	rarely	Less than 15 hours (about 3 hours per day)	15-20 hours (approximately 4 hours per day)	26-30 hours (approximately 6 hours per day)	sometimes	more than 30 hours (more than 6 hours per day)	Less than 15 hours (about 3 hours per day)	26-30 hours (approximately 6 hours per day)	2-3 months	Less than 5 hours	No	Some physical activity	By car or taxi	1	1	7	1	half an hour	I don't want to answer	From an hour to less than two hours	half an hour	1	7	3	7	I don't know	I don't know	I don't know	half an hour	more than 8 hours	2 to 4 hours	4 hours to 8 hours	half an hour	half an hour	I don't know	Yes	2-3 times a week	I don't know
2021-02-17 19:12:44	Yes	18-24	Single	Other	165	49	Yes	Female	Yes, definitely	no never	Yes, definitely	Yes, definitely	Less than 15 hours (about 3 hours per day)	15-20 hours (approximately 4 hours per day)	15-20 hours (approximately 4 hours per day)	sometimes	more than 30 hours (more than 6 hours per day)	Less than 15 hours (about 3 hours per day)	15-20 hours (approximately 4 hours per day)	2-3 months	6 hours	Yes	Almost sitting	By car or taxi	1	1	4	1	4 hours to 8 hours	half an hour	half an hour	4 hours to 8 hours	1	1	1	1	1	2	3	4 hours to 8 hours	4 hours to 8 hours	From an hour to less than two hours	From an hour to less than two hours	half an hour	half an hour	half an hour	Yes	1-3 times a month	1-3 times a month
2021-02-17 19:14:18	Yes	18-24	Single	Other	167	80	Yes	Female	Yes, definitely	Yes, definitely	sometimes	Yes, definitely	Less than 15 hours (about 3 hours per day)	Less than 15 hours (about 3 hours per day)	15-20 hours (approximately 4 hours per day)	sometimes	15-20 hours (approximately 4 hours per day)	21-25 hours (approximately 5 hours per day)	21-25 hours (approximately 5 hours per day)	less than a month	6 hours	Yes	Almost sitting	by walking	1	1	1	1	half an hour	half an hour	half an hour	half an hour	1	1	1	1	1	1	1	half an hour	half an hour	half an hour	half an hour	half an hour	half an hour	half an hour	I don't know	1-3 times a month	1-3 times a month
2021-02-17 19:14:34	Yes	18-24	Single	Humanities (media, languages, law....etc)	164	58	Yes	Female	Almost	rarely	Yes, definitely	Yes, definitely	Less than 15 hours (about 3 hours per day)	Less than 15 hours (about 3 hours per day)	26-30 hours (approximately 6 hours per day)	sometimes	more than 30 hours (more than 6 hours per day)	Less than 15 hours (about 3 hours per day)	Less than 15 hours (about 3 hours per day)	less than a month	9 hours	Yes	Almost sitting	By car or taxi	1	1	4	1	From an hour to less than two hours	half an hour, From an hour to less than two hours	half an hour	half an hour	1	2	3	4	1	2	4	more than 8 hours	2 to 4 hours	half an hour	half an hour	From an hour to less than two hours	half an hour	half an hour	No	I don't know	once a week
2021-02-17 19:15:27	Yes	18-24	Single	Health sciences (medicine, pharmacy, applied medical sciences, dentistry)	151	65	Yes	Female	Yes, definitely	Yes, definitely	sometimes	Yes, definitely	٢٦ -٣٠ ساعات ( تقريباً ٦ساعات يومياً)	Less than 15 hours (about 3 hours per day)	26-30 hours (approximately 6 hours per day)	rarely	more than 30 hours (more than 6 hours per day)	26-30 hours (approximately 6 hours per day)	Less than 15 hours (about 3 hours per day)	2-3 months	6 hours	Yes	Almost sitting	By car or taxi	1	1	4	1	From an hour to less than two hours	half an hour	half an hour	half an hour	1	1	1	1	3	3	1	From an hour to less than two hours	From an hour to less than two hours	From an hour to less than two hours	From an hour to less than two hours	From an hour to less than two hours	From an hour to less than two hours	half an hour	No	I don't know	I don't know
2021-02-17 19:16:48	Yes	25-27	Married	Natural Sciences (Physics, Chemistry, Biochemistry ... etc.)	165	68	No	Female	Yes, definitely	Yes, definitely	Yes, definitely	no never	Less than 15 hours (about 3 hours per day)	21-25 hours (approximately 5 hours per day)	Less than 15 hours (about 3 hours per day)	Yes, definitely	Less than 15 hours (about 3 hours per day)	Less than 15 hours (about 3 hours per day)	Less than 15 hours (about 3 hours per day)	2-3 months	6 hours	No	Almost standing and walking	By car or taxi	1	1	4	1	I don't know	I don't know	From an hour to less than two hours	I don't know	4	1	2	4	4	3	1	4 hours to 8 hours	From an hour to less than two hours	2 to 4 hours	2 to 4 hours	2 to 4 hours	From an hour to less than two hours	half an hour	Yes	4-5 times a week	I don't know
2021-02-17 19:17:00	Yes	18-24	Married	Other	160	50	Yes	Female	sometimes	Yes, definitely	Yes, definitely	Yes, definitely	Less than 15 hours (about 3 hours per day)	15-20 hours (approximately 4 hours per day)	21-25 hours (approximately 5 hours per day)	sometimes	more than 30 hours (more than 6 hours per day)	Less than 15 hours (about 3 hours per day)	more than 30 hours (more than 6 hours per day)	less than a month	Less than 5 hours	No	Almost sitting	By car or taxi	I don't want to answer	I don't want to answer	1	I don't want to answer	I don't want to answer	I don't want to answer	From an hour to less than two hours	I don't want to answer	1	5	I don't know	7	1 to 2	3	I don't want to answer	I don't want to answer	I don't want to answer	I don't want to answer	I don't want to answer	I don't want to answer	I don't want to answer	I don't want to answer	Yes	6-7 times a week	1-3 times a month
2021-02-17 19:18:47	Yes	18-24	Single	Other	160	56	Yes	Female	Almost	Yes, definitely	Yes, definitely	sometimes	21-25 hours (approximately 5 hours per day)	21-25 hours (approximately 5 hours per day)	Less than 15 hours (about 3 hours per day)	rarely	26-30 hours (approximately 6 hours per day)	Less than 15 hours (about 3 hours per day)	more than 30 hours (more than 6 hours per day)	less than a month	Less than 5 hours	Yes	Almost sitting	By car or taxi	1	1	4	1	4 hours to 8 hours	From an hour to less than two hours	half an hour	half an hour	1	2	2	4	3	1	1	half an hour	2 to 4 hours	From an hour to less than two hours	4 hours to 8 hours	From an hour to less than two hours	half an hour	From an hour to less than two hours	No	1-3 times a month	1-3 times a month
2021-02-17 19:19:11	Yes	18-24	Single	Other	167	53	Yes	Female	Yes, definitely	Yes, definitely	no never	Yes, definitely	Less than 15 hours (about 3 hours per day)	21-25 hours (approximately 5 hours per day)	26-30 hours (approximately 6 hours per day)	rarely	more than 30 hours (more than 6 hours per day)	Less than 15 hours (about 3 hours per day)	15-20 hours (approximately 4 hours per day)	less than a month	6 hours	No	A combination of sitting and standing up	By car or taxi	I don't know	I don't know	I don't know	I don't know	From an hour to less than two hours, I don't know	I don't know	I don't know	I don't know	2	7	4	7	6	I don't know	I don't know	more than 8 hours	more than 8 hours	half an hour	From an hour to less than two hours, 4 hours to 8 hours	4 hours to 8 hours, I don't know	I don't know	I don't know	No	I don't know	I don't know
2021-02-17 19:19:35	Yes	18-24	Single	Other	157	65	Yes	Female	Yes, definitely	no never	Yes, definitely	Yes, definitely	Less than 15 hours (about 3 hours per day)	15-20 hours (approximately 4 hours per day)	21-25 hours (approximately 5 hours per day)	Yes, definitely	21-25 hours (approximately 5 hours per day)	Less than 15 hours (about 3 hours per day)	15-20 hours (approximately 4 hours per day)	less than a month	6 hours	No	Almost standing and walking	By car or taxi	5	1	7	1	From an hour to less than two hours	half an hour	From an hour to less than two hours	half an hour	1	7	3	6	1	3	1	half an hour	4 hours to 8 hours	From an hour to less than two hours	2 to 4 hours	half an hour	half an hour	half an hour	Yes	2-3 times a week	4-5 times a week
2021-02-17 19:19:53	Yes	more than 27	Married	Humanities (media, languages, law....etc)	100	50	Yes	Female	sometimes	sometimes	no never	Yes, definitely	Less than 15 hours (about 3 hours per day)	21-25 hours (approximately 5 hours per day)	15-20 hours (approximately 4 hours per day)	sometimes	21-25 hours (approximately 5 hours per day)	15-20 hours (approximately 4 hours per day)	more than 30 hours (more than 6 hours per day)	less than a month	Less than 5 hours	Yes	Almost standing and walking	Bike or bus rides	1	1	1	1	half an hour	half an hour	half an hour	half an hour	1	1	1	1	1	1	1	half an hour	half an hour	half an hour	half an hour	half an hour	half an hour	half an hour	Yes	1-3 times a month	1-3 times a month
2021-02-17 19:20:50	Yes	more than 27	Married	Other	160	172	No	Female	Almost	no never	Yes, definitely	Yes, definitely	Less than 15 hours (about 3 hours per day)	Less than 15 hours (about 3 hours per day)	more than 30 hours (more than 6 hours per day)	sometimes	more than 30 hours (more than 6 hours per day)	more than 30 hours (more than 6 hours per day)	26-30 hours (approximately 6 hours per day)	less than a month	8 hours	No	A combination of sitting and standing up	By car or taxi	1	2	2 to 5	2	half an hour	half an hour	half an hour	half an hour	5	3	2	5	2	2	1	half an hour	half an hour	From an hour to less than two hours	From an hour to less than two hours	From an hour to less than two hours	half an hour	half an hour	Yes	1-3 times a month	once a week
2021-02-17 19:26:23	Yes	18-24	Single	Health sciences (medicine, pharmacy, applied medical sciences, dentistry)	154	80	Yes	Female	Almost	rarely	Yes, definitely	sometimes	more than 30 hours (more than 6 hours per day)	Less than 15 hours (about 3 hours per day)	26-30 hours (approximately 6 hours per day)	sometimes	26-30 hours (approximately 6 hours per day)	26-30 hours (approximately 6 hours per day)	15-20 hours (approximately 4 hours per day)	7-12 months	7 hours	No	Almost sitting	By car or taxi	I don't want to answer	I don't want to answer	2	3	I don't want to answer	I don't want to answer	From an hour to less than two hours	I don't want to answer	I don't want to answer	I don't want to answer	4	5	3	3	I don't want to answer	half an hour	half an hour	more than 8 hours	more than 8 hours	4 hours to 8 hours	From an hour to less than two hours	I don't want to answer	No	I don't know	I don't know
2021-02-17 19:29:18	Yes	18-24	Single	Other	170	60	Yes	Female	Almost	Almost	Yes, definitely	Almost	15-20 hours (approximately 4 hours per day)	Less than 15 hours (about 3 hours per day)	15-20 hours (approximately 4 hours per day)	sometimes	15-20 hours (approximately 4 hours per day)	Less than 15 hours (about 3 hours per day)	21-25 hours (approximately 5 hours per day)	less than a month	Less than 5 hours	No	A combination of sitting and standing up	Bike or bus rides	1	7	1	1	half an hour	half an hour	half an hour	half an hour	2	7	1	7	1	2	1	half an hour	more than 8 hours	half an hour	more than 8 hours	half an hour	half an hour	half an hour	Yes	1-3 times a month	1-3 times a month
2021-02-17 19:30:01	Yes	more than 27	Married	Other	185	111	No	Male	Yes, definitely	Yes, definitely	Yes, definitely	Yes, definitely	Less than 15 hours (about 3 hours per day)	Less than 15 hours (about 3 hours per day)	more than 30 hours (more than 6 hours per day)	Almost	Less than 15 hours (about 3 hours per day)	more than 30 hours (more than 6 hours per day)	21-25 hours (approximately 5 hours per day)	less than a month	6 hours	Yes	A combination of sitting and standing up	By car or taxi	I don't know	I don't know	7	I don't know	I don't want to answer	I don't want to answer	half an hour	I don't want to answer	1	2	3	4	5	6	7	half an hour	From an hour to less than two hours	2 to 4 hours	4 hours to 8 hours	more than 8 hours	I don't know	I don't want to answer	Yes	4-5 times a week	2-3 times a week
2021-02-17 19:32:29	Yes	18-24	Single	Health sciences (medicine, pharmacy, applied medical sciences, dentistry)	178	58	Yes	Male	Yes, definitely	no never	Yes, definitely	Yes, definitely	Less than 15 hours (about 3 hours per day)	Less than 15 hours (about 3 hours per day)	Less than 15 hours (about 3 hours per day)	Yes, definitely	Less than 15 hours (about 3 hours per day)	Less than 15 hours (about 3 hours per day)	Less than 15 hours (about 3 hours per day)	2-3 months	6 hours	Yes	Almost standing and walking	By car or taxi	1	1	1	1	half an hour	half an hour	From an hour to less than two hours	half an hour	1	1	2	4	1	3	4	half an hour	From an hour to less than two hours	4 hours to 8 hours	4 hours to 8 hours	half an hour	4 hours to 8 hours	4 hours to 8 hours	Yes	2-3 times a week	2-3 times a week
2021-02-17 19:34:40	Yes	25-27	Single	Other	171	72	No	Male	no never	Almost	sometimes	Almost	Less than 15 hours (about 3 hours per day)	Less than 15 hours (about 3 hours per day)	26-30 hours (approximately 6 hours per day)	sometimes	Less than 15 hours (about 3 hours per day)	26-30 hours (approximately 6 hours per day)	Less than 15 hours (about 3 hours per day)	less than a month	Less than 5 hours	Yes	A combination of sitting and standing up	By car or taxi	1	1	4	1	From an hour to less than two hours	From an hour to less than two hours	From an hour to less than two hours	half an hour	1	1	1	1	1	2	2	From an hour to less than two hours	half an hour	half an hour	half an hour	half an hour	half an hour	From an hour to less than two hours	Yes	2-3 times a week	once a week, 2-3 times a week
2021-02-17 19:36:04	Yes	18-24	Single	Health sciences (medicine, pharmacy, applied medical sciences, dentistry)	165	44	Yes	Female	Yes, definitely	Yes, definitely	Yes, definitely	Almost	٢٦ -٣٠ ساعات ( تقريباً ٦ساعات يومياً)	Less than 15 hours (about 3 hours per day)	26-30 hours (approximately 6 hours per day)	rarely	21-25 hours (approximately 5 hours per day)	Less than 15 hours (about 3 hours per day)	Less than 15 hours (about 3 hours per day)	2-3 months	I don't know	No	A combination of sitting and standing up	By car or taxi	I don't know	٤, I don't know	7	I don't know	I don't know	I don't know	half an hour	I don't know	3	7	I don't know	1	I don't know	4	I don't know	2 to 4 hours	2 to 4 hours	I don't know	half an hour	I don't know	From an hour to less than two hours	I don't know	No	1-3 times a month	1-3 times a month
2021-02-17 19:36:22	Yes	18-24	Single	Health sciences (medicine, pharmacy, applied medical sciences, dentistry)	166	75	Yes	Female	Almost	Yes, definitely	Almost	Almost	15-20 hours (approximately 4 hours per day)	Less than 15 hours (about 3 hours per day)	Less than 15 hours (about 3 hours per day)	no never	21-25 hours (approximately 5 hours per day)	15-20 hours (approximately 4 hours per day)	Less than 15 hours (about 3 hours per day)	7-12 months	8 hours	Yes	Almost sitting	By car or taxi	1	1	7	1	half an hour	half an hour	half an hour	half an hour	1	4	2	3	1	1	1	4 hours to 8 hours	4 hours to 8 hours	From an hour to less than two hours	From an hour to less than two hours	half an hour	half an hour	half an hour	No	2-3 times a week	once a week
2021-02-17 19:37:31	Yes	18-24	Single	Health sciences (medicine, pharmacy, applied medical sciences, dentistry)	166	57	Yes	Female	no never	Yes, definitely	Yes, definitely	sometimes	Less than 15 hours (about 3 hours per day)	Less than 15 hours (about 3 hours per day)	21-25 hours (approximately 5 hours per day)	Yes, definitely	15-20 hours (approximately 4 hours per day)	Less than 15 hours (about 3 hours per day)	Less than 15 hours (about 3 hours per day)	2-3 months	Less than 5 hours	Yes	Almost sitting	By car or taxi	1	1	5	1	half an hour	half an hour	half an hour	half an hour	1	5	1	1	2	1	1	half an hour	more than 8 hours	half an hour	From an hour to less than two hours	From an hour to less than two hours, 2 to 4 hours	half an hour	half an hour	Yes	2-3 times a week	2-3 times a week
2021-02-17 19:38:13	Yes	18-24	Single	Health sciences (medicine, pharmacy, applied medical sciences, dentistry)	153	49	Yes	Female	Yes, definitely	Almost	Almost	sometimes	more than 30 hours (more than 6 hours per day)	15-20 hours (approximately 4 hours per day)	15-20 hours (approximately 4 hours per day)	Almost	15-20 hours (approximately 4 hours per day)	Less than 15 hours (about 3 hours per day)	21-25 hours (approximately 5 hours per day)	4-6 months	6 hours	No	A combination of sitting and standing up	by walking	3	1	1	1	half an hour	half an hour	half an hour	half an hour	1	1	2	1	2	2	2	From an hour to less than two hours	2 to 4 hours	From an hour to less than two hours	From an hour to less than two hours	From an hour to less than two hours	From an hour to less than two hours	From an hour to less than two hours	No	1-3 times a month	1-3 times a month
2021-02-17 19:40:06	Yes	18-24	Single	Health sciences (medicine, pharmacy, applied medical sciences, dentistry)	159	63	Yes	Female	Almost	sometimes	rarely	Almost	Less than 15 hours (about 3 hours per day)	15-20 hours (approximately 4 hours per day)	more than 30 hours (more than 6 hours per day)	no never	more than 30 hours (more than 6 hours per day)	Less than 15 hours (about 3 hours per day)	Less than 15 hours (about 3 hours per day)	2-3 months	6 hours	Yes	Almost sitting	By car or taxi	I don't want to answer	I don't want to answer	7	I don't want to answer	I don't know	I don't know	half an hour	I don't know	2	7	I don't know	I don't know	I don't know	I don't know	I don't know	half an hour	2 to 4 hours	I don't know	I don't know	I don't know	half an hour	I don't know	No	I don't want to answer	I don't want to answer
2021-02-17 19:41:58	Yes	18-24	Single	Other	155	40	Yes	Female	Almost	Yes, definitely	Yes, definitely	Yes, definitely	Less than 15 hours (about 3 hours per day)	Less than 15 hours (about 3 hours per day)	26-30 hours (approximately 6 hours per day)	sometimes	26-30 hours (approximately 6 hours per day)	Less than 15 hours (about 3 hours per day)	Less than 15 hours (about 3 hours per day)	2-3 months	Less than 5 hours	Yes	A combination of sitting and standing up	By car or taxi	1	1	5	1	half an hour	half an hour	half an hour	half an hour	1	5	1	1	3	1	3	half an hour	more than 8 hours	From an hour to less than two hours	half an hour	From an hour to less than two hours	half an hour	From an hour to less than two hours	No	1-3 times a month	1-3 times a month
2021-02-17 19:43:10	Yes	18-24	Single	Health sciences (medicine, pharmacy, applied medical sciences, dentistry)	151	40	Yes	Female	rarely	no never	Yes, definitely	sometimes	15-20 hours (approximately 4 hours per day)	Less than 15 hours (about 3 hours per day)	more than 30 hours (more than 6 hours per day)	sometimes	Less than 15 hours (about 3 hours per day)	15-20 hours (approximately 4 hours per day)	15-20 hours (approximately 4 hours per day)	less than a month	6 hours	Yes	Almost sitting	By car or taxi	1	1	1	1	half an hour	half an hour	half an hour	half an hour	1	1	1	1	1	1	1	half an hour	half an hour	half an hour	half an hour	half an hour	half an hour	half an hour	No	1-3 times a month	1-3 times a month
2021-02-17 19:43:14	Yes	more than 27	Married	Other	160	68	No	Female	Yes, definitely	Yes, definitely	Yes, definitely	sometimes	15-20 hours (approximately 4 hours per day)	21-25 hours (approximately 5 hours per day)	21-25 hours (approximately 5 hours per day)	rarely	21-25 hours (approximately 5 hours per day)	15-20 hours (approximately 4 hours per day)	21-25 hours (approximately 5 hours per day)	less than a month	6 hours	No	Heavy manual labor	I don't know	4	4	3	4	4 hours to 8 hours	I don't know	I don't know	I don't know	4	4 to 6	3	3 to 6	4	٣, I don't know	٤, I don't know	2 to 4 hours	2 to 4 hours	2 to 4 hours	4 hours to 8 hours	From an hour to less than two hours	2 to 4 hours	2 to 4 hours	No	2-3 times a week	4-5 times a week
2021-02-17 19:45:28	Yes	18-24	Single	Health sciences (medicine, pharmacy, applied medical sciences, dentistry)	157	48	Yes	Female	no never	Yes, definitely	Yes, definitely	rarely	Less than 15 hours (about 3 hours per day)	Less than 15 hours (about 3 hours per day)	26-30 hours (approximately 6 hours per day)	Yes, definitely	21-25 hours (approximately 5 hours per day)	Less than 15 hours (about 3 hours per day)	Less than 15 hours (about 3 hours per day)	4-6 months	6 hours	No	Almost sitting	By car or taxi	I don't want to answer	I don't want to answer	7	I don't want to answer	I don't want to answer	I don't want to answer	half an hour	I don't want to answer	5	7	I don't want to answer	1	3	3	I don't want to answer	half an hour	4 hours to 8 hours	I don't know	I don't know	I don't know	I don't know	I don't know	Yes	2-3 times a week	I don't know
2021-02-17 19:49:59	Yes	18-24	Married	Other	150	50	Yes	Female	Almost	Yes, definitely	Yes, definitely	Almost	Less than 15 hours (about 3 hours per day)	21-25 hours (approximately 5 hours per day)	Less than 15 hours (about 3 hours per day)	rarely	more than 30 hours (more than 6 hours per day)	Less than 15 hours (about 3 hours per day)	Less than 15 hours (about 3 hours per day)	2-3 months	Less than 5 hours	Yes	Almost sitting	By car or taxi	1	1	7	1	half an hour	half an hour	half an hour	half an hour	1	1	1	1	1	1	1	From an hour to less than two hours	half an hour	half an hour	2 to 4 hours	half an hour	half an hour	half an hour	Yes	1-3 times a month	I don't know
2021-02-17 19:56:04	Yes	18-24	Single	Other	161	80	Yes	Female	sometimes	no never	Yes, definitely	Yes, definitely	Less than 15 hours (about 3 hours per day)	15-20 hours (approximately 4 hours per day)	Less than 15 hours (about 3 hours per day)	Yes, definitely	26-30 hours (approximately 6 hours per day)	Less than 15 hours (about 3 hours per day)	more than 30 hours (more than 6 hours per day)	more than 12 months	10 hours or more	Yes	Some physical activity	By car or taxi	3	2	5	1	more than 8 hours	From an hour to less than two hours	From an hour to less than two hours	half an hour	2	5	2	7	5	2	1	half an hour	2 to 4 hours	half an hour	2 to 4 hours	From an hour to less than two hours	From an hour to less than two hours	half an hour	No	once a week	6-7 times a week
2021-02-17 20:00:19	Yes	18-24	Single	Other	163	53	Yes	Female	sometimes	Yes, definitely	Almost	Almost	Less than 15 hours (about 3 hours per day)	Less than 15 hours (about 3 hours per day)	26-30 hours (approximately 6 hours per day)	rarely	21-25 hours (approximately 5 hours per day)	Less than 15 hours (about 3 hours per day)	15-20 hours (approximately 4 hours per day)	2-3 months	Less than 5 hours	I don't know	A combination of sitting and standing up	By car or taxi	4	I don't know	5	I don't know	half an hour	I don't know	From an hour to less than two hours	I don't know	I don't know	7	I don't know	3	3	4	I don't know	I don't know	more than 8 hours	I don't know	From an hour to less than two hours	half an hour	From an hour to less than two hours	I don't know	Yes	1-3 times a month	2-3 times a week
2021-02-17 20:00:22	Yes	18-24	Single	Health sciences (medicine, pharmacy, applied medical sciences, dentistry)	160	60	Yes	Female	Almost	Yes, definitely	Yes, definitely	sometimes	Less than 15 hours (about 3 hours per day)	15-20 hours (approximately 4 hours per day)	more than 30 hours (more than 6 hours per day)	no never	more than 30 hours (more than 6 hours per day)	Less than 15 hours (about 3 hours per day)	15-20 hours (approximately 4 hours per day)	less than a month	Less than 5 hours	No	A combination of sitting and standing up	By car or taxi	1	1	5	1	half an hour	half an hour	half an hour	half an hour	3	6	1	1	1	1	1	From an hour to less than two hours	4 hours to 8 hours	half an hour, From an hour to less than two hours	half an hour	half an hour	half an hour	half an hour	No	1-3 times a month	1-3 times a month
2021-02-17 20:05:11	Yes	25-27	Single	Other	175	85	No	Male	Yes, definitely	Yes, definitely	rarely	Almost	Less than 15 hours (about 3 hours per day)	15-20 hours (approximately 4 hours per day)	more than 30 hours (more than 6 hours per day)	no never	more than 30 hours (more than 6 hours per day)	Less than 15 hours (about 3 hours per day)	21-25 hours (approximately 5 hours per day)	4-6 months	Less than 5 hours	Yes	Almost sitting	By car or taxi	I don't want to answer	I don't want to answer	5	I don't want to answer	I don't want to answer	I don't want to answer	half an hour	I don't want to answer	7	7	I don't want to answer	2	2	٢, I don't want to answer	I don't want to answer	From an hour to less than two hours	more than 8 hours	I don't want to answer	2 to 4 hours	2 to 4 hours	4 hours to 8 hours	I don't want to answer	No	1-3 times a month	1-3 times a month
2021-02-17 20:16:11	Yes	18-24	Single	Health sciences (medicine, pharmacy, applied medical sciences, dentistry)	151	56	Yes	Female	Yes, definitely	Yes, definitely	Almost	Yes, definitely	Less than 15 hours (about 3 hours per day)	Less than 15 hours (about 3 hours per day)	26-30 hours (approximately 6 hours per day)	rarely	26-30 hours (approximately 6 hours per day)	Less than 15 hours (about 3 hours per day)	Less than 15 hours (about 3 hours per day)	2-3 months	8 hours	Yes	A combination of sitting and standing up	By car or taxi	I don't want to answer	I don't want to answer	5	I don't want to answer	I don't want to answer	half an hour	half an hour	half an hour	5	7	1	1	1	1	1	half an hour	more than 8 hours	From an hour to less than two hours	half an hour	half an hour	half an hour	half an hour	No	1-3 times a month	I don't want to answer
2021-02-17 20:19:21	Yes	18-24	Single	Health sciences (medicine, pharmacy, applied medical sciences, dentistry)	157	46	Yes	Female	Yes, definitely	Yes, definitely	rarely	Yes, definitely	Less than 15 hours (about 3 hours per day)	Less than 15 hours (about 3 hours per day)	26-30 hours (approximately 6 hours per day)	no never	more than 30 hours (more than 6 hours per day)	Less than 15 hours (about 3 hours per day)	Less than 15 hours (about 3 hours per day)	2-3 months	8 hours	Yes	A combination of sitting and standing up	By car or taxi	2	I don't know	7	I don't know	From an hour to less than two hours	I don't know	half an hour	I don't know	7	5	1	2	3	2	I don't know	2 to 4 hours	From an hour to less than two hours	From an hour to less than two hours	From an hour to less than two hours	From an hour to less than two hours	From an hour to less than two hours	I don't know	No	I don't know	I don't know
2021-02-17 20:24:10	Yes	25-27	Single	Humanities (media, languages, law....etc)	176	68	Yes	Male	no never	Yes, definitely	Yes, definitely	Almost	Less than 15 hours (about 3 hours per day)	Less than 15 hours (about 3 hours per day)	Less than 15 hours (about 3 hours per day)	sometimes	15-20 hours (approximately 4 hours per day)	Less than 15 hours (about 3 hours per day)	Less than 15 hours (about 3 hours per day)	less than a month	8 hours	Yes	Some physical activity	By car or taxi	1 to 6	2	1	1	I don't want to answer	From an hour to less than two hours, I don't want to answer	half an hour, more than 8 hours, I don't want to answer	I don't want to answer	I don't want to answer	I don't want to answer	I don't want to answer	I don't want to answer	٢, ٣, I don't want to answer	I don't want to answer	٢, I don't want to answer	I don't want to answer	I don't want to answer	From an hour to less than two hours, I don't want to answer	I don't want to answer	2 to 4 hours, I don't want to answer	From an hour to less than two hours, I don't want to answer	From an hour to less than two hours, I don't want to answer	Yes	I don't want to answer	I don't want to answer
2021-02-17 20:24:49	Yes	18-24	Single	Humanities (media, languages, law....etc)	154	42	Yes	Female	Almost	Yes, definitely	Yes, definitely	Yes, definitely	Less than 15 hours (about 3 hours per day)	15-20 hours (approximately 4 hours per day)	26-30 hours (approximately 6 hours per day)	sometimes	26-30 hours (approximately 6 hours per day)	Less than 15 hours (about 3 hours per day)	21-25 hours (approximately 5 hours per day)	less than a month	9 hours	No	A combination of sitting and standing up	By car or taxi	4	1	4	1	2 to 4 hours	half an hour	From an hour to less than two hours	half an hour	1	3	2	4	2	1	2	From an hour to less than two hours	2 to 4 hours	half an hour	From an hour to less than two hours	From an hour to less than two hours	half an hour	half an hour	Yes	once a week	once a week
2021-02-17 20:25:53	Yes	18-24	Single	Health sciences (medicine, pharmacy, applied medical sciences, dentistry)	I don't know but 155-160	60	Yes	Female	sometimes	sometimes	sometimes	sometimes	Less than 15 hours (about 3 hours per day)	Less than 15 hours (about 3 hours per day)	15-20 hours (approximately 4 hours per day)	sometimes	21-25 hours (approximately 5 hours per day)	15-20 hours (approximately 4 hours per day)	Less than 15 hours (about 3 hours per day)	less than a month	I don't want to answer	I don't want to answer	A combination of sitting and standing up	I don't want to answer	I don't want to answer	I don't want to answer	I don't want to answer	I don't want to answer	I don't want to answer	I don't want to answer	I don't want to answer	I don't want to answer	I don't want to answer	I don't want to answer	I don't want to answer	I don't want to answer	I don't want to answer	I don't want to answer	I don't want to answer	I don't want to answer	I don't want to answer	I don't want to answer	I don't want to answer	I don't want to answer	I don't want to answer	I don't want to answer	No	I don't want to answer	I don't want to answer
2021-02-17 20:26:56	Yes	18-24	Single	Health sciences (medicine, pharmacy, applied medical sciences, dentistry)	155	70	Yes	Female	Yes, definitely	Yes, definitely	Almost	sometimes	15-20 hours (approximately 4 hours per day)	15-20 hours (approximately 4 hours per day)	more than 30 hours (more than 6 hours per day)	Almost	more than 30 hours (more than 6 hours per day)	Less than 15 hours (about 3 hours per day)	15-20 hours (approximately 4 hours per day)	2-3 months	Less than 5 hours	Yes	A combination of sitting and standing up	By car or taxi	3	1	2	1	From an hour to less than two hours	half an hour	From an hour to less than two hours	half an hour	1	2	3	4	1	2	1	half an hour	half an hour	half an hour	From an hour to less than two hours	half an hour	From an hour to less than two hours	half an hour	No	once a week	2-3 times a week
2021-02-17 20:29:03	Yes	more than 27	Married	Humanities (media, languages, law....etc)	100	50	Yes	Female	sometimes	sometimes	no never	Yes, definitely	Less than 15 hours (about 3 hours per day)	21-25 hours (approximately 5 hours per day)	15-20 hours (approximately 4 hours per day)	sometimes	21-25 hours (approximately 5 hours per day)	15-20 hours (approximately 4 hours per day)	more than 30 hours (more than 6 hours per day)	less than a month	Less than 5 hours	Yes	Almost standing and walking	Bike or bus rides	1	1	1	1	half an hour	half an hour	half an hour	half an hour	1	1	1	1	1	1	1	half an hour	half an hour	half an hour	half an hour	half an hour	half an hour	half an hour	Yes	1-3 times a month	1-3 times a month
2021-02-17 20:30:13	Yes	18-24	Single	Other	173	75	Yes	Male	Yes, definitely	Almost	Almost	sometimes	Less than 15 hours (about 3 hours per day)	Less than 15 hours (about 3 hours per day)	15-20 hours (approximately 4 hours per day)	no never	more than 30 hours (more than 6 hours per day)	Less than 15 hours (about 3 hours per day)	Less than 15 hours (about 3 hours per day)	2-3 months	Less than 5 hours	Yes	A combination of sitting and standing up	By car or taxi	1	1	5	1	From an hour to less than two hours	From an hour to less than two hours	half an hour	From an hour to less than two hours	3	7	1	1	1	7	1	half an hour	From an hour to less than two hours	half an hour	half an hour	half an hour	From an hour to less than two hours	half an hour	Yes	1-3 times a month	4-5 times a week
2021-02-17 20:35:29	Yes	18-24	Single	Other	153	34	Yes	Female	sometimes	Yes, definitely	Yes, definitely	Yes, definitely	Less than 15 hours (about 3 hours per day)	Less than 15 hours (about 3 hours per day)	Less than 15 hours (about 3 hours per day)	Almost	21-25 hours (approximately 5 hours per day)	Less than 15 hours (about 3 hours per day)	more than 30 hours (more than 6 hours per day)	less than a month	7 hours	No	Heavy manual labor	Bike or bus rides	I don't know	7	7	I don't know	more than 8 hours	2 to 4 hours	2 to 4 hours	I don't know	1	7	I don't know	7	1	4	1	From an hour to less than two hours	2 to 4 hours	half an hour	more than 8 hours	4 hours to 8 hours	From an hour to less than two hours	half an hour	No	once a week	once a week
2021-02-17 20:38:21	Yes	18-24	Married	Humanities (media, languages, law....etc)	156	45	Yes	Female	no never	sometimes	sometimes	Yes, definitely	Less than 15 hours (about 3 hours per day)	Less than 15 hours (about 3 hours per day)	more than 30 hours (more than 6 hours per day)	Almost	more than 30 hours (more than 6 hours per day)	26-30 hours (approximately 6 hours per day)	Less than 15 hours (about 3 hours per day)	2-3 months	9 hours	Yes	Almost standing and walking	By car or taxi	1	1	5	1	half an hour	half an hour	2 to 4 hours	half an hour	1	3	2	4	4	2	1	half an hour	2 to 4 hours	half an hour	2 to 4 hours	more than 8 hours	From an hour to less than two hours	half an hour	Yes	1-3 times a month	6-7 times a week
2021-02-17 20:40:20	Yes	18-24	Single	Other	162	60	Yes	Female	Yes, definitely	Yes, definitely	Almost	Yes, definitely	Less than 15 hours (about 3 hours per day)	Less than 15 hours (about 3 hours per day)	15-20 hours (approximately 4 hours per day)	no never	21-25 hours (approximately 5 hours per day)	Less than 15 hours (about 3 hours per day)	Less than 15 hours (about 3 hours per day)	2-3 months	8 hours	Yes	Almost sitting	By car or taxi	I don't know	I don't know	5	I don't know	From an hour to less than two hours	I don't know	half an hour	I don't know	1	I don't know	I don't know	I don't know	I don't know	1	I don't know	From an hour to less than two hours	I don't know	I don't know	I don't know	I don't know	I don't know	I don't know	No	I don't know	I don't know
2021-02-17 20:40:34	Yes	18-24	Married	Health sciences (medicine, pharmacy, applied medical sciences, dentistry)	166	60	Yes	Female	Yes, definitely	Yes, definitely	rarely	Yes, definitely	Less than 15 hours (about 3 hours per day)	15-20 hours (approximately 4 hours per day)	more than 30 hours (more than 6 hours per day)	no never	more than 30 hours (more than 6 hours per day)	Less than 15 hours (about 3 hours per day)	21-25 hours (approximately 5 hours per day)	less than a month	9 hours	No	A combination of sitting and standing up	By car or taxi	I don't want to answer	1	7	1	half an hour, I don't know	I don't know	half an hour	I don't know	5	6	4	6	2	1	1	4 hours to 8 hours	I don't know	2 to 4 hours	4 hours to 8 hours	2 to 4 hours	I don't know	I don't know	No	1-3 times a month	I don't know
2021-02-17 20:40:42	Yes	18-24	Single	Other	152	52	Yes	Female	sometimes	Yes, definitely	Almost	rarely	Less than 15 hours (about 3 hours per day)	Less than 15 hours (about 3 hours per day)	Less than 15 hours (about 3 hours per day)	Almost	21-25 hours (approximately 5 hours per day)	21-25 hours (approximately 5 hours per day)	Less than 15 hours (about 3 hours per day)	2-3 months	6 hours	Yes	Almost sitting	By car or taxi	1	1	3	1	half an hour	half an hour	half an hour	half an hour	2	1	1	1	2	2	1	From an hour to less than two hours	half an hour	half an hour	half an hour	From an hour to less than two hours	From an hour to less than two hours	half an hour	No	1-3 times a month	1-3 times a month
2021-02-17 20:45:33	Yes	18-24	Single	Health sciences (medicine, pharmacy, applied medical sciences, dentistry)	I think 160	45	Yes	Female	Yes, definitely	Yes, definitely	Yes, definitely	Almost	Less than 15 hours (about 3 hours per day)	15-20 hours (approximately 4 hours per day)	15-20 hours (approximately 4 hours per day)	Yes, definitely	Less than 15 hours (about 3 hours per day)	Less than 15 hours (about 3 hours per day)	Less than 15 hours (about 3 hours per day)	2-3 months	6 hours	Yes	Almost sitting	By car or taxi	I don't know	I don't know	7	I don't want to answer	I don't know	I don't know	From an hour to less than two hours	I don't know, I don't want to answer	3	6 to 7	1	4	6	3	5	From an hour to less than two hours	more than 8 hours	2 to 4 hours	4 hours to 8 hours	2 to 4 hours	4 hours to 8 hours	4 hours to 8 hours	No	I don't know	1-3 times a month
2021-02-17 20:46:05	Yes	18-24	Single	Health sciences (medicine, pharmacy, applied medical sciences, dentistry)	154	64	Yes	Female	Yes, definitely	no never	Yes, definitely	no never	Less than 15 hours (about 3 hours per day)	Less than 15 hours (about 3 hours per day)	more than 30 hours (more than 6 hours per day)	Yes, definitely	26-30 hours (approximately 6 hours per day)	Less than 15 hours (about 3 hours per day)	21-25 hours (approximately 5 hours per day)	less than a month	I don't know	No	A combination of sitting and standing up	By car or taxi	3	1	7	I don't know	I don't know	half an hour	half an hour	I don't know	3	7	1	I don't know	1	1	I don't know	half an hour	2 to 4 hours	I don't know	I don't know	half an hour	half an hour	I don't know	No	1-3 times a month	1-3 times a month
2021-02-17 20:46:31	Yes	18-24	Single	Humanities (media, languages, law....etc)	156	50	Yes	Female	Yes, definitely	Yes, definitely	no never	Yes, definitely	Less than 15 hours (about 3 hours per day)	Less than 15 hours (about 3 hours per day)	15-20 hours (approximately 4 hours per day)	no never	Less than 15 hours (about 3 hours per day)	Less than 15 hours (about 3 hours per day)	Less than 15 hours (about 3 hours per day)	less than a month	10 hours or more	Yes	A combination of sitting and standing up	Bike or bus rides	1	1	2	1	half an hour	more than 8 hours	half an hour	half an hour	5	5	3	3	1	1	1	2 to 4 hours	2 to 4 hours	From an hour to less than two hours	2 to 4 hours	half an hour	half an hour	half an hour	No	1-3 times a month, I don't know	I don't know
2021-02-17 20:47:21	Yes	18-24	Married	Other	159	72	Yes	Female	no never	no never	Almost	sometimes	Less than 15 hours (about 3 hours per day)	Less than 15 hours (about 3 hours per day)	Less than 15 hours (about 3 hours per day)	Almost	26-30 hours (approximately 6 hours per day)	Less than 15 hours (about 3 hours per day)	Less than 15 hours (about 3 hours per day)	4-6 months	9 hours	I don't know	A combination of sitting and standing up	By car or taxi	2	1	5 to 6	1	From an hour to less than two hours	half an hour	From an hour to less than two hours	half an hour	5	5	1	7, I don't know, I don't want to answer	1	1 to 2 to 4	1	half an hour	half an hour	half an hour	half an hour	half an hour	half an hour	half an hour	No	1-3 times a month	1-3 times a month
2021-02-17 20:48:12	Yes	18-24	Single	Health sciences (medicine, pharmacy, applied medical sciences, dentistry)	165	54	Yes	Female	Almost	Yes, definitely	Yes, definitely	Almost	Less than 15 hours (about 3 hours per day)	Less than 15 hours (about 3 hours per day)	21-25 hours (approximately 5 hours per day)	no never	26-30 hours (approximately 6 hours per day)	26-30 hours (approximately 6 hours per day)	Less than 15 hours (about 3 hours per day)	2-3 months	Less than 5 hours	Yes	A combination of sitting and standing up	By car or taxi	I don't know	I don't know	5	I don't want to answer	I don't know	I don't know	From an hour to less than two hours	I don't know	I don't know	I don't know	4	I don't know	I don't want to answer	I don't know	I don't know	I don't want to answer	I don't want to answer	I don't want to answer	I don't want to answer	I don't want to answer	I don't know	I don't want to answer	No	I don't know	I don't know
2021-02-17 20:51:36	Yes	18-24	Single	Other	160	45	Yes	Female	Almost	no never	Yes, definitely	Almost	15-20 hours (approximately 4 hours per day)	21-25 hours (approximately 5 hours per day)	Less than 15 hours (about 3 hours per day)	Almost	15-20 hours (approximately 4 hours per day)	Less than 15 hours (about 3 hours per day)	21-25 hours (approximately 5 hours per day)	2-3 months	8 hours	Yes	Almost sitting	By car or taxi	2	4	5	3	4 hours to 8 hours	From an hour to less than two hours	4 hours to 8 hours	2 to 4 hours	4	5	1	5	3	2 to 4	2	From an hour to less than two hours	From an hour to less than two hours	half an hour	2 to 4 hours	From an hour to less than two hours	From an hour to less than two hours	From an hour to less than two hours	No	once a week	once a week
2021-02-17 20:55:42	Yes	18-24	Single	Health sciences (medicine, pharmacy, applied medical sciences, dentistry)	164	64	Yes	Female	Yes, definitely	Almost	rarely	Almost	٢٦ -٣٠ ساعات ( تقريباً ٦ساعات يومياً)	Less than 15 hours (about 3 hours per day)	Less than 15 hours (about 3 hours per day)	no never	more than 30 hours (more than 6 hours per day)	Less than 15 hours (about 3 hours per day)	15-20 hours (approximately 4 hours per day)	2-3 months	7 hours	No	Almost sitting	I don't know	2	1	1	1	From an hour to less than two hours	half an hour	From an hour to less than two hours	half an hour	1	1	1	2	2	2	1	half an hour	half an hour	From an hour to less than two hours	From an hour to less than two hours	From an hour to less than two hours	half an hour	half an hour	No	1-3 times a month	once a week
2021-02-17 20:58:37	Yes	18-24	Married	Health sciences (medicine, pharmacy, applied medical sciences, dentistry)	157	69	Yes	Female	Yes, definitely	Yes, definitely	Yes, definitely	sometimes	Less than 15 hours (about 3 hours per day)	Less than 15 hours (about 3 hours per day)	26-30 hours (approximately 6 hours per day)	rarely	more than 30 hours (more than 6 hours per day)	Less than 15 hours (about 3 hours per day)	Less than 15 hours (about 3 hours per day)	2-3 months	7 hours	No	Almost sitting	By car or taxi	I don't know	I don't know	7	I don't know	I don't know	I don't know	half an hour	I don't know	7	4	2	4	1	1	I don't know	From an hour to less than two hours	From an hour to less than two hours	half an hour	From an hour to less than two hours	From an hour to less than two hours	half an hour	half an hour	No	1-3 times a month, I don't know	1-3 times a month, I don't know
2021-02-17 20:58:59	Yes	18-24	Single	Humanities (media, languages, law....etc)	167	66	Yes	Female	Yes, definitely	Yes, definitely	rarely	rarely	Less than 15 hours (about 3 hours per day)	Less than 15 hours (about 3 hours per day)	more than 30 hours (more than 6 hours per day)	no never	26-30 hours (approximately 6 hours per day)	Less than 15 hours (about 3 hours per day)	Less than 15 hours (about 3 hours per day)	2-3 months	I don't know	No	Almost sitting	By car or taxi	I don't know	I don't know	5	I don't know	I don't know	I don't know	half an hour, From an hour to less than two hours, 2 to 4 hours, 4 hours to 8 hours, more than 8 hours	I don't know	I don't want to answer	I don't want to answer	I don't want to answer	2 to 4	7	6	I don't know	I don't want to answer	I don't know	I don't know	2 to 4 hours	I don't know	2 to 4 hours	I don't know	No	I don't know	1-3 times a month
2021-02-17 21:01:03	Yes	18-24	Single	Other	152	37	Yes	Female	Yes, definitely	Almost	sometimes	Yes, definitely	Less than 15 hours (about 3 hours per day)	Less than 15 hours (about 3 hours per day)	more than 30 hours (more than 6 hours per day)	rarely	Less than 15 hours (about 3 hours per day)	Less than 15 hours (about 3 hours per day)	Less than 15 hours (about 3 hours per day)	less than a month	9 hours	Yes	A combination of sitting and standing up	By car or taxi	I don't know	1	7	1	From an hour to less than two hours	From an hour to less than two hours	From an hour to less than two hours	half an hour	7	7	5	5	5	6	3	2 to 4 hours	4 hours to 8 hours	From an hour to less than two hours	From an hour to less than two hours	From an hour to less than two hours	From an hour to less than two hours	From an hour to less than two hours	No	once a week	2-3 times a week
2021-02-17 21:09:52	Yes	18-24	Single	Health sciences (medicine, pharmacy, applied medical sciences, dentistry)	162	56	Yes	Female	Yes, definitely	Almost	rarely	Almost	Less than 15 hours (about 3 hours per day)	Less than 15 hours (about 3 hours per day)	21-25 hours (approximately 5 hours per day)	rarely	more than 30 hours (more than 6 hours per day)	Less than 15 hours (about 3 hours per day)	Less than 15 hours (about 3 hours per day)	less than a month	6 hours	Yes	Almost standing and walking	By car or taxi	I don't know	I don't know	5	I don't know	I don't know	I don't know	half an hour	I don't know	7	7	4	3	3	5	1	more than 8 hours	more than 8 hours	2 to 4 hours	From an hour to less than two hours	From an hour to less than two hours	4 hours to 8 hours	half an hour	No	I don't know	I don't know
2021-02-17 21:11:35	Yes	18-24	Single	Health sciences (medicine, pharmacy, applied medical sciences, dentistry)	160	56	Yes	Female	Almost	Almost	rarely	Almost	Less than 15 hours (about 3 hours per day)	Less than 15 hours (about 3 hours per day)	more than 30 hours (more than 6 hours per day)	no never	more than 30 hours (more than 6 hours per day)	Less than 15 hours (about 3 hours per day)	Less than 15 hours (about 3 hours per day)	less than a month	6 hours	Yes	Almost sitting	By car or taxi	I don't know	I don't know	3	I don't know	I don't know	I don't know	half an hour	I don't know	1	1	1	1	I don't know	I don't know	I don't know	From an hour to less than two hours	half an hour	half an hour	half an hour	From an hour to less than two hours	half an hour	I don't know	No	I don't know	I don't know
2021-02-17 21:18:37	Yes	25-27	Married	Other	152	54	Yes	Female	no never	no never	sometimes	no never	Less than 15 hours (about 3 hours per day)	21-25 hours (approximately 5 hours per day)	26-30 hours (approximately 6 hours per day)	sometimes	26-30 hours (approximately 6 hours per day)	Less than 15 hours (about 3 hours per day)	21-25 hours (approximately 5 hours per day)	less than a month	7 hours	Yes	A combination of sitting and standing up	By car or taxi	2	2	2	2	From an hour to less than two hours	From an hour to less than two hours	From an hour to less than two hours	From an hour to less than two hours	7	7	7	7	7	7	I don't know	4 hours to 8 hours	2 to 4 hours	From an hour to less than two hours	more than 8 hours	From an hour to less than two hours	From an hour to less than two hours	I don't want to answer	No	I don't know	6-7 times a week
2021-02-17 21:23:20	Yes	18-24	Single	Health sciences (medicine, pharmacy, applied medical sciences, dentistry)	156	56	Yes	Female	sometimes	Yes, definitely	Yes, definitely	Yes, definitely	Less than 15 hours (about 3 hours per day)	15-20 hours (approximately 4 hours per day)	26-30 hours (approximately 6 hours per day)	Almost	more than 30 hours (more than 6 hours per day)	more than 30 hours (more than 6 hours per day)	21-25 hours (approximately 5 hours per day)	less than a month	6 hours	Yes	Heavy manual labor	By car or taxi	4	2	4	1	From an hour to less than two hours	half an hour	4 hours to 8 hours	half an hour	1	3	4	2	1	4	1	half an hour	4 hours to 8 hours	4 hours to 8 hours	From an hour to less than two hours	half an hour	4 hours to 8 hours	half an hour	Yes	2-3 times a week	4-5 times a week
2021-02-17 21:27:58	Yes	18-24	Single	Other	153	50	Yes	Female	Almost	Yes, definitely	Yes, definitely	Almost	15-20 hours (approximately 4 hours per day)	Less than 15 hours (about 3 hours per day)	26-30 hours (approximately 6 hours per day)	no never	more than 30 hours (more than 6 hours per day)	Less than 15 hours (about 3 hours per day)	Less than 15 hours (about 3 hours per day)	less than a month	Less than 5 hours	Yes	Almost sitting	By car or taxi	I don't know	I don't know	7	I don't know	I don't know	I don't know	half an hour	I don't know	1	I don't know	I don't know	1	I don't know	I don't know	I don't know	4 hours to 8 hours	I don't know	I don't know	2 to 4 hours	I don't know	I don't know	I don't know	No	1-3 times a month	1-3 times a month
2021-02-17 21:29:51	Yes	18-24	Single	Other	153	45	Yes	Female	Yes, definitely	Yes, definitely	Yes, definitely	Almost	Less than 15 hours (about 3 hours per day)	Less than 15 hours (about 3 hours per day)	more than 30 hours (more than 6 hours per day)	no never	15-20 hours (approximately 4 hours per day)	Less than 15 hours (about 3 hours per day)	Less than 15 hours (about 3 hours per day)	less than a month	I don't know	No	Almost sitting	By car or taxi	I don't know	I don't know	3	I don't know	I don't know	I don't know	From an hour to less than two hours	I don't know	I don't know	7	I don't know	2	1	1	6	I don't want to answer	2 to 4 hours	I don't know	half an hour	From an hour to less than two hours	I don't know	I don't know	I don't know	I don't know	I don't know
2021-02-17 21:31:09	Yes	18-24	Single	Health sciences (medicine, pharmacy, applied medical sciences, dentistry)	158	60	Yes	Female	Yes, definitely	Almost	rarely	Yes, definitely	Less than 15 hours (about 3 hours per day)	21-25 hours (approximately 5 hours per day)	more than 30 hours (more than 6 hours per day)	rarely	more than 30 hours (more than 6 hours per day)	Less than 15 hours (about 3 hours per day)	21-25 hours (approximately 5 hours per day)	less than a month	10 hours or more	Yes	Almost sitting	By car or taxi	I don't know	I don't know	7	I don't know	I don't know	I don't know	From an hour to less than two hours	I don't know	2	7	7	3	I don't know	2	I don't know	2 to 4 hours	2 to 4 hours, 4 hours to 8 hours, more than 8 hours	more than 8 hours	From an hour to less than two hours	2 to 4 hours	half an hour	I don't know	No	1-3 times a month	once a week
2021-02-17 21:33:01	Yes	18-24	Single	Other	148	40	Yes	Female	Yes, definitely	Yes, definitely	Yes, definitely	Yes, definitely	Less than 15 hours (about 3 hours per day)	Less than 15 hours (about 3 hours per day)	more than 30 hours (more than 6 hours per day)	sometimes	more than 30 hours (more than 6 hours per day)	Less than 15 hours (about 3 hours per day)	15-20 hours (approximately 4 hours per day)	less than a month	6 hours	Yes	Almost sitting	By car or taxi	3	I don't want to answer	4	I don't want to answer	From an hour to less than two hours	I don't want to answer	2 to 4 hours	I don't want to answer	4	5	I don't know	3	5	3	I don't know	From an hour to less than two hours	more than 8 hours	I don't know	From an hour to less than two hours	From an hour to less than two hours	From an hour to less than two hours	I don't know	No	I don't know	I don't know
2021-02-17 21:40:13	Yes	under 18	Single	Other	156	41	Yes	Female	Almost	Almost	sometimes	Yes, definitely	Less than 15 hours (about 3 hours per day)	Less than 15 hours (about 3 hours per day)	Less than 15 hours (about 3 hours per day)	sometimes	26-30 hours (approximately 6 hours per day)	Less than 15 hours (about 3 hours per day)	Less than 15 hours (about 3 hours per day)	less than a month	8 hours	Yes	Almost sitting	By car or taxi	1 to 3	1	1 to 2	1	half an hour, From an hour to less than two hours	half an hour	half an hour	half an hour	1	5	1	7	2	3	1	half an hour	4 hours to 8 hours	From an hour to less than two hours	From an hour to less than two hours	From an hour to less than two hours	half an hour	half an hour	No	once a week	2-3 times a week
2021-02-17 21:44:01	Yes	more than 27	Married	Health sciences (medicine, pharmacy, applied medical sciences, dentistry)	168	90	No	Male	Yes, definitely	Yes, definitely	Yes, definitely	sometimes	Less than 15 hours (about 3 hours per day)	15-20 hours (approximately 4 hours per day)	Less than 15 hours (about 3 hours per day)	sometimes	Less than 15 hours (about 3 hours per day)	Less than 15 hours (about 3 hours per day)	15-20 hours (approximately 4 hours per day)	less than a month	7 hours	Yes	A combination of sitting and standing up	By car or taxi	2	2	2	2	half an hour	half an hour	half an hour	half an hour	1	1	1	1	1	1	1	half an hour	half an hour	half an hour	half an hour	half an hour	half an hour	half an hour	No	1-3 times a month	once a week
2021-02-17 21:45:32	Yes	25-27	Single	Humanities (media, languages, law....etc)	179	77	No	Male	Almost	Yes, definitely	sometimes	Yes, definitely	Less than 15 hours (about 3 hours per day)	Less than 15 hours (about 3 hours per day)	Less than 15 hours (about 3 hours per day)	Almost	Less than 15 hours (about 3 hours per day)	Less than 15 hours (about 3 hours per day)	Less than 15 hours (about 3 hours per day)	less than a month	6 hours	Yes	A combination of sitting and standing up	By car or taxi	3	1	7	1	half an hour	half an hour	half an hour, more than 8 hours	half an hour	3	7	4	4	1	1	1	2 to 4 hours	4 hours to 8 hours	half an hour	half an hour	half an hour	2 to 4 hours	half an hour	Yes	4-5 times a week	1-3 times a month
2021-02-17 21:46:53	Yes	18-24	Single	Health sciences (medicine, pharmacy, applied medical sciences, dentistry)	158	60	Yes	Female	Yes, definitely	Almost	rarely	Yes, definitely	Less than 15 hours (about 3 hours per day)	21-25 hours (approximately 5 hours per day)	more than 30 hours (more than 6 hours per day)	rarely	more than 30 hours (more than 6 hours per day)	Less than 15 hours (about 3 hours per day)	21-25 hours (approximately 5 hours per day)	less than a month	10 hours or more	Yes	Almost sitting	By car or taxi	I don't know	I don't know	7	I don't know	I don't know	I don't know	From an hour to less than two hours	I don't know	2	7	7	3	I don't know	2	I don't know	2 to 4 hours	2 to 4 hours, 4 hours to 8 hours, more than 8 hours	more than 8 hours	From an hour to less than two hours	2 to 4 hours	half an hour	I don't know	No	1-3 times a month	once a week
2021-02-17 22:17:36	Yes	18-24	Married	Health sciences (medicine, pharmacy, applied medical sciences, dentistry)	157	69	Yes	Female	Yes, definitely	Yes, definitely	Yes, definitely	sometimes	Less than 15 hours (about 3 hours per day)	Less than 15 hours (about 3 hours per day)	26-30 hours (approximately 6 hours per day)	rarely	more than 30 hours (more than 6 hours per day)	Less than 15 hours (about 3 hours per day)	Less than 15 hours (about 3 hours per day)	2-3 months	7 hours	No	Almost sitting	By car or taxi	I don't know	I don't know	7	I don't know	I don't know	I don't know	half an hour	I don't know	7	4	2	4	1	1	I don't know	From an hour to less than two hours	From an hour to less than two hours	half an hour	From an hour to less than two hours	From an hour to less than two hours	half an hour	half an hour	No	1-3 times a month, I don't know	1-3 times a month, I don't know
2021-02-17 22:19:38	Yes	18-24	Single	Humanities (media, languages, law....etc)	156	43	Yes	Female	no never	no never	Yes, definitely	rarely	Less than 15 hours (about 3 hours per day)	15-20 hours (approximately 4 hours per day)	more than 30 hours (more than 6 hours per day)	Yes, definitely	26-30 hours (approximately 6 hours per day)	Less than 15 hours (about 3 hours per day)	15-20 hours (approximately 4 hours per day)	less than a month	8 hours	Yes	Almost sitting	By car or taxi	1	1	5	1	half an hour	half an hour	half an hour	half an hour	2	5	2	5	3	4	1	half an hour	2 to 4 hours	From an hour to less than two hours	2 to 4 hours	From an hour to less than two hours	2 to 4 hours	half an hour	No	2-3 times a week	2-3 times a week
2021-02-17 22:28:26	Yes	18-24	Married	Humanities (media, languages, law....etc)	148	32.5	Yes	Female	Almost	Yes, definitely	Yes, definitely	sometimes	Less than 15 hours (about 3 hours per day)	15-20 hours (approximately 4 hours per day)	more than 30 hours (more than 6 hours per day)	sometimes	26-30 hours (approximately 6 hours per day)	Less than 15 hours (about 3 hours per day)	15-20 hours (approximately 4 hours per day)	less than a month	6 hours	No	Almost standing and walking	Bike or bus rides	I don't know	7	I don't know	I don't know	I don't know	From an hour to less than two hours	half an hour	I don't know	3	7	3	7	3	4	1	From an hour to less than two hours	4 hours to 8 hours	From an hour to less than two hours	2 to 4 hours	half an hour	From an hour to less than two hours	half an hour	No	1-3 times a month	I don't know
2021-02-17 22:28:52	Yes	more than 27	Married	Other	175	70	No	Male	no never	sometimes	Yes, definitely	Almost	Less than 15 hours (about 3 hours per day)	Less than 15 hours (about 3 hours per day)	Less than 15 hours (about 3 hours per day)	Yes, definitely	Less than 15 hours (about 3 hours per day)	Less than 15 hours (about 3 hours per day)	Less than 15 hours (about 3 hours per day)	less than a month	6 hours	Yes	Almost sitting	By car or taxi	1	1	7, I don't know, I don't want to answer	1	half an hour	half an hour	half an hour	half an hour	1	1	1	1	1	1	1	half an hour	half an hour	half an hour	half an hour	half an hour	half an hour	half an hour	No	1-3 times a month	1-3 times a month
2021-02-17 22:35:46	Yes	18-24	Single	Other	152	52	Yes	Female	Yes, definitely	sometimes	Almost	Almost	Less than 15 hours (about 3 hours per day)	Less than 15 hours (about 3 hours per day)	26-30 hours (approximately 6 hours per day)	sometimes	26-30 hours (approximately 6 hours per day)	Less than 15 hours (about 3 hours per day)	Less than 15 hours (about 3 hours per day)	less than a month	Less than 5 hours	No	Almost sitting	By car or taxi	1	I don't know	2	I don't know	half an hour	I don't know	From an hour to less than two hours	I don't know	2	7	2	I don't want to answer	I don't want to answer	I don't know	I don't know	From an hour to less than two hours	more than 8 hours	From an hour to less than two hours	From an hour to less than two hours	I don't know	I don't know	I don't know	I don't know	1-3 times a month	I don't know
2021-02-17 22:39:45	Yes	18-24	Single	Other	151	45	Yes	Female	Yes, definitely	Yes, definitely	Yes, definitely	Yes, definitely	Less than 15 hours (about 3 hours per day)	Less than 15 hours (about 3 hours per day)	more than 30 hours (more than 6 hours per day)	Yes, definitely	more than 30 hours (more than 6 hours per day)	more than 30 hours (more than 6 hours per day)	Less than 15 hours (about 3 hours per day)	less than a month	9 hours	Yes	Almost sitting	By car or taxi	I don't want to answer	I don't want to answer	1	I don't want to answer	I don't want to answer	I don't want to answer	From an hour to less than two hours	I don't want to answer	7	7	4	1	1	4	I don't want to answer	2 to 4 hours	4 hours to 8 hours	From an hour to less than two hours	I don't want to answer	From an hour to less than two hours	From an hour to less than two hours	I don't want to answer	Yes	6-7 times a week	I don't want to answer
2021-02-17 22:46:37	Yes	18-24	Single	Humanities (media, languages, law....etc)	151	57	Yes	Female	no never	sometimes	Yes, definitely	Yes, definitely	Less than 15 hours (about 3 hours per day)	Less than 15 hours (about 3 hours per day)	15-20 hours (approximately 4 hours per day)	Almost	15-20 hours (approximately 4 hours per day)	Less than 15 hours (about 3 hours per day)	Less than 15 hours (about 3 hours per day)	2-3 months	Less than 5 hours	Yes	Almost sitting	By car or taxi	I don't know	2 to 6	2	1	half an hour	From an hour to less than two hours	From an hour to less than two hours	From an hour to less than two hours	7	1 to 2	2	1	3	3	1	half an hour	From an hour to less than two hours	half an hour	From an hour to less than two hours	half an hour	From an hour to less than two hours	half an hour	No	1-3 times a month	2-3 times a week
2021-02-17 22:48:10	Yes	more than 27	Married	Other	165	56	No	Female	no never	Yes, definitely	Yes, definitely	sometimes	Less than 15 hours (about 3 hours per day)	أكثر من ٣٠ ساعات ( اكثر من ٦ساعات يومياً)	Less than 15 hours (about 3 hours per day)	sometimes	26-30 hours (approximately 6 hours per day)	Less than 15 hours (about 3 hours per day)	more than 30 hours (more than 6 hours per day)	less than a month	6 hours	No	Almost sitting	I don't know	4	4	4	4	half an hour, I don't know	I don't know	half an hour, I don't know	half an hour, I don't know	4	3	4	I don't want to answer	4	1	1	I don't know	I don't know	I don't know	I don't know	I don't know	I don't know	I don't know	No	I don't know	I don't know
2021-02-17 22:50:35	Yes	18-24	Single	Other	163	53	Yes	Female	sometimes	Yes, definitely	Almost	Almost	Less than 15 hours (about 3 hours per day)	Less than 15 hours (about 3 hours per day)	26-30 hours (approximately 6 hours per day)	rarely	21-25 hours (approximately 5 hours per day)	Less than 15 hours (about 3 hours per day)	15-20 hours (approximately 4 hours per day)	2-3 months	Less than 5 hours	I don't know	A combination of sitting and standing up	By car or taxi	4	I don't know	5	I don't know	half an hour	I don't know	From an hour to less than two hours	I don't know	I don't know	7	I don't know	3	3	4	I don't know	I don't know	more than 8 hours	I don't know	From an hour to less than two hours	half an hour	From an hour to less than two hours	I don't know	Yes	1-3 times a month	2-3 times a week
2021-02-17 23:05:41	Yes	18-24	Single	Humanities (media, languages, law....etc)	165	89	Yes	Female	Yes, definitely	Yes, definitely	sometimes	Yes, definitely	Less than 15 hours (about 3 hours per day)	15-20 hours (approximately 4 hours per day)	more than 30 hours (more than 6 hours per day)	rarely	more than 30 hours (more than 6 hours per day)	Less than 15 hours (about 3 hours per day)	more than 30 hours (more than 6 hours per day)	less than a month	9 hours	Yes	Almost sitting	By car or taxi	I don't want to answer	I don't want to answer	5	I don't want to answer	2 to 4 hours	I don't want to answer	From an hour to less than two hours	I don't want to answer	I don't want to answer	7	7	1	1	4	I don't want to answer	half an hour	4 hours to 8 hours	From an hour to less than two hours	half an hour	half an hour	2 to 4 hours	I don't want to answer	No	once a week	once a week
2021-02-17 23:10:32	Yes	18-24	Single	Other	160	60	Yes	Female	Yes, definitely	Yes, definitely	no never	Yes, definitely	Less than 15 hours (about 3 hours per day)	15-20 hours (approximately 4 hours per day)	more than 30 hours (more than 6 hours per day)	rarely	21-25 hours (approximately 5 hours per day)	Less than 15 hours (about 3 hours per day)	15-20 hours (approximately 4 hours per day)	less than a month	6 hours	No	Almost sitting	By car or taxi	I don't know	I don't know	2	I don't know	I don't know	I don't know	From an hour to less than two hours	I don't know	I don't know	6	I don't know	٤, I don't know	٣, I don't know	I don't know	I don't know	more than 8 hours	more than 8 hours	half an hour, I don't know	2 to 4 hours	I don't know	I don't know	I don't know	No	I don't know	I don't know
2021-02-17 23:23:43	Yes	18-24	Single	Other	148	42	Yes	Female	rarely	Yes, definitely	Yes, definitely	rarely	Less than 15 hours (about 3 hours per day)	Less than 15 hours (about 3 hours per day)	15-20 hours (approximately 4 hours per day)	Almost	21-25 hours (approximately 5 hours per day)	Less than 15 hours (about 3 hours per day)	Less than 15 hours (about 3 hours per day)	less than a month	8 hours	Yes	Some physical activity	Bike or bus rides	1	1	4	1	From an hour to less than two hours	half an hour, From an hour to less than two hours	half an hour	half an hour	1	4	2	2	1	2	2	half an hour	From an hour to less than two hours	From an hour to less than two hours	half an hour	half an hour	half an hour	half an hour	Yes	2-3 times a week	once a week
2021-02-17 23:25:41	Yes	18-24	Married	Other	150	50	Yes	Female	Almost	Yes, definitely	Yes, definitely	Almost	Less than 15 hours (about 3 hours per day)	21-25 hours (approximately 5 hours per day)	Less than 15 hours (about 3 hours per day)	rarely	more than 30 hours (more than 6 hours per day)	Less than 15 hours (about 3 hours per day)	Less than 15 hours (about 3 hours per day)	2-3 months	Less than 5 hours	Yes	Almost sitting	By car or taxi	1	1	7	1	half an hour	half an hour	half an hour	half an hour	1	1	1	1	1	1	1	From an hour to less than two hours	half an hour	half an hour	2 to 4 hours	half an hour	half an hour	half an hour	Yes	1-3 times a month	I don't know
2021-02-17 23:26:07	Yes	18-24	Single	Health sciences (medicine, pharmacy, applied medical sciences, dentistry)	155	70	Yes	Female	Yes, definitely	Yes, definitely	Almost	sometimes	15-20 hours (approximately 4 hours per day)	15-20 hours (approximately 4 hours per day)	more than 30 hours (more than 6 hours per day)	Almost	more than 30 hours (more than 6 hours per day)	Less than 15 hours (about 3 hours per day)	15-20 hours (approximately 4 hours per day)	2-3 months	Less than 5 hours	Yes	A combination of sitting and standing up	By car or taxi	3	1	2	1	From an hour to less than two hours	half an hour	From an hour to less than two hours	half an hour	1	2	3	4	1	2	1	half an hour	half an hour	half an hour	From an hour to less than two hours	half an hour	From an hour to less than two hours	half an hour	No	once a week	2-3 times a week
2021-02-17 23:36:09	Yes	18-24	Married	Other	160	50	Yes	Female	sometimes	Yes, definitely	Yes, definitely	Yes, definitely	Less than 15 hours (about 3 hours per day)	15-20 hours (approximately 4 hours per day)	21-25 hours (approximately 5 hours per day)	sometimes	more than 30 hours (more than 6 hours per day)	Less than 15 hours (about 3 hours per day)	more than 30 hours (more than 6 hours per day)	less than a month	Less than 5 hours	No	Almost sitting	By car or taxi	I don't want to answer	I don't want to answer	1	I don't want to answer	I don't want to answer	I don't want to answer	From an hour to less than two hours	I don't want to answer	1	5	I don't know	7	1 to 2	3	I don't want to answer	I don't want to answer	I don't want to answer	I don't want to answer	I don't want to answer	I don't want to answer	I don't want to answer	I don't want to answer	Yes	6-7 times a week	1-3 times a month
2021-02-17 23:36:20	Yes	18-24	Single	Other	160	45	Yes	Female	Almost	no never	Yes, definitely	Almost	15-20 hours (approximately 4 hours per day)	21-25 hours (approximately 5 hours per day)	Less than 15 hours (about 3 hours per day)	Almost	15-20 hours (approximately 4 hours per day)	Less than 15 hours (about 3 hours per day)	21-25 hours (approximately 5 hours per day)	2-3 months	8 hours	Yes	Almost sitting	By car or taxi	2	4	5	3	4 hours to 8 hours	From an hour to less than two hours	4 hours to 8 hours	2 to 4 hours	4	5	1	5	3	2 to 4	2	From an hour to less than two hours	From an hour to less than two hours	half an hour	2 to 4 hours	From an hour to less than two hours	From an hour to less than two hours	From an hour to less than two hours	No	once a week	once a week
2021-02-17 23:36:31	Yes	more than 27	Married	Natural Sciences (Physics, Chemistry, Biochemistry ... etc.)	175	75	No	Male	Yes, definitely	no never	Almost	Almost	Less than 15 hours (about 3 hours per day)	Less than 15 hours (about 3 hours per day)	more than 30 hours (more than 6 hours per day)	no never	15-20 hours (approximately 4 hours per day)	Less than 15 hours (about 3 hours per day)	Less than 15 hours (about 3 hours per day)	less than a month	Less than 5 hours	Yes	Almost sitting	By car or taxi	I don't want to answer	I don't want to answer	1	I don't want to answer	I don't want to answer	I don't want to answer	half an hour	I don't want to answer	7	7	I don't want to answer	I don't want to answer	1	I don't want to answer	I don't want to answer	2 to 4 hours	2 to 4 hours	half an hour	half an hour	2 to 4 hours	I don't want to answer	I don't want to answer	No	I don't want to answer	I don't want to answer
2021-02-17 23:50:52	Yes	18-24	Single	Other	154	43	Yes	Female	sometimes	Yes, definitely	Yes, definitely	no never	Less than 15 hours (about 3 hours per day)	Less than 15 hours (about 3 hours per day)	15-20 hours (approximately 4 hours per day)	rarely	26-30 hours (approximately 6 hours per day)	Less than 15 hours (about 3 hours per day)	Less than 15 hours (about 3 hours per day)	2-3 months	7 hours	I don't know	Almost sitting	By car or taxi	3	1	7	I don't know	half an hour	half an hour	2 to 4 hours	I don't know	5	7	6	7	4	1	1	2 to 4 hours	From an hour to less than two hours, 2 to 4 hours	4 hours to 8 hours	4 hours to 8 hours	From an hour to less than two hours	half an hour	half an hour	No	1-3 times a month, once a week	once a week
2021-02-17 23:52:27	Yes	18-24	Single	Humanities (media, languages, law....etc)	154	57	Yes	Female	Yes, definitely	sometimes	Almost	no never	Less than 15 hours (about 3 hours per day)	Less than 15 hours (about 3 hours per day)	more than 30 hours (more than 6 hours per day)	rarely	more than 30 hours (more than 6 hours per day)	Less than 15 hours (about 3 hours per day)	Less than 15 hours (about 3 hours per day)	4-6 months	6 hours	Yes	Almost sitting	By car or taxi	1	1	4	1	half an hour	half an hour	From an hour to less than two hours	half an hour	2	4	2	1	1	1	1	half an hour	half an hour, I don't know	half an hour, I don't know	I don't know	4 hours to 8 hours	4 hours to 8 hours	4 hours to 8 hours	No	1-3 times a month	1-3 times a month
2021-02-17 23:54:28	Yes	18-24	Married	Health sciences (medicine, pharmacy, applied medical sciences, dentistry)	158	58	Yes	Female	no never	no never	Yes, definitely	rarely	Less than 15 hours (about 3 hours per day)	Less than 15 hours (about 3 hours per day)	26-30 hours (approximately 6 hours per day)	Yes, definitely	21-25 hours (approximately 5 hours per day)	Less than 15 hours (about 3 hours per day)	15-20 hours (approximately 4 hours per day)	4-6 months	7 hours	I don't know	Almost sitting	By car or taxi	5	2	3	1	2 to 4 hours	half an hour	From an hour to less than two hours	2 to 4 hours	1	3	3	3	3	3	3	2 to 4 hours	half an hour	From an hour to less than two hours	2 to 4 hours	From an hour to less than two hours	half an hour	From an hour to less than two hours	Yes	1-3 times a month	once a week
2021-02-17 23:55:55	Yes	18-24	Single	Humanities (media, languages, law....etc)	156	59	Yes	Female	Almost	Yes, definitely	sometimes	Yes, definitely	Less than 15 hours (about 3 hours per day)	Less than 15 hours (about 3 hours per day)	more than 30 hours (more than 6 hours per day)	Almost	26-30 hours (approximately 6 hours per day)	Less than 15 hours (about 3 hours per day)	21-25 hours (approximately 5 hours per day)	2-3 months	10 hours or more	Yes	Almost sitting	By car or taxi	3	2	1	3	I don't know	From an hour to less than two hours	From an hour to less than two hours	I don't know	5	3	4	5	4	2	2	From an hour to less than two hours	From an hour to less than two hours	2 to 4 hours	more than 8 hours	4 hours to 8 hours	From an hour to less than two hours	half an hour	No	1-3 times a month	once a week
2021-02-18 00:02:03	Yes	18-24	Single	Other	180	80	Yes	Male	no never	no never	sometimes	Almost	Less than 15 hours (about 3 hours per day)	21-25 hours (approximately 5 hours per day)	21-25 hours (approximately 5 hours per day)	Yes, definitely	26-30 hours (approximately 6 hours per day)	Less than 15 hours (about 3 hours per day)	15-20 hours (approximately 4 hours per day)	2-3 months	10 hours or more	I don't know	Almost standing and walking	By car or taxi	1	2	1	2	From an hour to less than two hours	From an hour to less than two hours	half an hour	From an hour to less than two hours	2	3	2	1	1	3	1	half an hour	half an hour	half an hour	From an hour to less than two hours	From an hour to less than two hours	From an hour to less than two hours	From an hour to less than two hours	Yes	once a week	once a week
2021-02-18 00:02:34	Yes	18-24	Single	Other	177	66	Yes	Male	sometimes	sometimes	no never	Yes, definitely	Less than 15 hours (about 3 hours per day)	15-20 hours (approximately 4 hours per day)	more than 30 hours (more than 6 hours per day)	no never	more than 30 hours (more than 6 hours per day)	more than 30 hours (more than 6 hours per day)	21-25 hours (approximately 5 hours per day)	7-12 months	9 hours	Yes	Some physical activity	by walking	7	I don't want to answer	I don't want to answer	I don't want to answer	half an hour	I don't want to answer	I don't want to answer	I don't want to answer	I don't want to answer	1	I don't want to answer	I don't want to answer	I don't want to answer	I don't want to answer	I don't want to answer	I don't want to answer	half an hour	I don't want to answer	I don't want to answer	I don't want to answer	I don't want to answer	I don't want to answer	Yes	6-7 times a week	6-7 times a week
2021-02-18 00:03:16	Yes	18-24	Single	Other	171	61	Yes	Male	Almost	Yes, definitely	sometimes	sometimes	Less than 15 hours (about 3 hours per day)	15-20 hours (approximately 4 hours per day)	15-20 hours (approximately 4 hours per day)	Almost	Less than 15 hours (about 3 hours per day)	Less than 15 hours (about 3 hours per day)	15-20 hours (approximately 4 hours per day)	2-3 months	9 hours	No	Almost sitting	By car or taxi	I don't want to answer	I don't want to answer	2	I don't want to answer	I don't want to answer	I don't want to answer	half an hour	I don't want to answer	2	5	I don't want to answer	3 to 4	1	2	I don't want to answer	From an hour to less than two hours	2 to 4 hours	I don't want to answer	half an hour	half an hour	I don't want to answer	I don't want to answer	Yes	I don't want to answer	I don't want to answer
2021-02-18 00:10:49	Yes	18-24	Single	Humanities (media, languages, law....etc)	158	56	Yes	Female	Almost	Yes, definitely	Yes, definitely	Almost	Less than 15 hours (about 3 hours per day)	Less than 15 hours (about 3 hours per day)	15-20 hours (approximately 4 hours per day)	sometimes	21-25 hours (approximately 5 hours per day)	Less than 15 hours (about 3 hours per day)	Less than 15 hours (about 3 hours per day)	less than a month	Less than 5 hours	Yes	A combination of sitting and standing up	By car or taxi	1	1	1	1	half an hour	half an hour	half an hour	half an hour	1	5 to 7	1	1	1	2	1	half an hour	more than 8 hours	half an hour	half an hour	half an hour	4 hours to 8 hours	half an hour	No	1-3 times a month	6-7 times a week
2021-02-18 00:33:35	Yes	18-24	Single	Humanities (media, languages, law....etc)	155	47	Yes	Female	Almost	sometimes	sometimes	rarely	Less than 15 hours (about 3 hours per day)	15-20 hours (approximately 4 hours per day)	more than 30 hours (more than 6 hours per day)	Almost	26-30 hours (approximately 6 hours per day)	Less than 15 hours (about 3 hours per day)	Less than 15 hours (about 3 hours per day)	2-3 months	6 hours	No	A combination of sitting and standing up	By car or taxi	1	1	4	1	half an hour	From an hour to less than two hours	From an hour to less than two hours	From an hour to less than two hours	1	1	1	3	2	2	1	half an hour	2 to 4 hours	From an hour to less than two hours	From an hour to less than two hours	From an hour to less than two hours	half an hour	From an hour to less than two hours	No	once a week	once a week
2021-02-18 00:39:07	Yes	18-24	Single	Other	159	66	Yes	Female	Yes, definitely	Almost	Yes, definitely	Almost	Less than 15 hours (about 3 hours per day)	15-20 hours (approximately 4 hours per day)	21-25 hours (approximately 5 hours per day)	sometimes	more than 30 hours (more than 6 hours per day)	Less than 15 hours (about 3 hours per day)	15-20 hours (approximately 4 hours per day)	less than a month	I don't know	I don't know	A combination of sitting and standing up	By car or taxi	7	I don't want to answer	1	I don't want to answer	half an hour	I don't know	half an hour	I don't want to answer	1	3	3	4	5	6	I don't know	half an hour	From an hour to less than two hours	From an hour to less than two hours	2 to 4 hours	From an hour to less than two hours	From an hour to less than two hours	I don't know	Yes	2-3 times a week	6-7 times a week
2021-02-18 01:09:42	Yes	18-24	Married	Other	159	72	Yes	Female	no never	no never	Almost	sometimes	Less than 15 hours (about 3 hours per day)	Less than 15 hours (about 3 hours per day)	Less than 15 hours (about 3 hours per day)	Almost	26-30 hours (approximately 6 hours per day)	Less than 15 hours (about 3 hours per day)	Less than 15 hours (about 3 hours per day)	4-6 months	9 hours	I don't know	A combination of sitting and standing up	By car or taxi	2	1	5 to 6	1	From an hour to less than two hours	half an hour	From an hour to less than two hours	half an hour	5	5	1	I don't know, I don't want to answer	1	1 to 2 to 4	1	half an hour	half an hour	half an hour	half an hour	half an hour	half an hour	half an hour	No	1-3 times a month	1-3 times a month
2021-02-18 01:22:55	Yes	18-24	Single	Humanities (media, languages, law....etc)	168	64	No	Female	Yes, definitely	no never	Yes, definitely	rarely	Less than 15 hours (about 3 hours per day)	21-25 hours (approximately 5 hours per day)	26-30 hours (approximately 6 hours per day)	sometimes	Less than 15 hours (about 3 hours per day)	21-25 hours (approximately 5 hours per day)	21-25 hours (approximately 5 hours per day)	less than a month	Less than 5 hours	No	A combination of sitting and standing up	By car or taxi	1	1	1	1	half an hour	4 hours to 8 hours	4 hours to 8 hours	4 hours to 8 hours	1	1	5	5	2	5	2	half an hour	half an hour	more than 8 hours	more than 8 hours	half an hour	half an hour	half an hour	No	once a week	once a week
2021-02-18 01:27:22	Yes	18-24	Single	Other	165	80	No	Female	Yes, definitely	Almost	sometimes	sometimes	Less than 15 hours (about 3 hours per day)	Less than 15 hours (about 3 hours per day)	more than 30 hours (more than 6 hours per day)	no never	more than 30 hours (more than 6 hours per day)	Less than 15 hours (about 3 hours per day)	Less than 15 hours (about 3 hours per day)	4-6 months	Less than 5 hours	I don't know	Almost sitting	By car or taxi	I don't know	I don't know	7	I don't want to answer	I don't know	I don't know	half an hour	I don't know	4	2	2	2	1	2	I don't know	4 hours to 8 hours	From an hour to less than two hours	2 to 4 hours	From an hour to less than two hours	From an hour to less than two hours	From an hour to less than two hours	I don't want to answer	No	I don't want to answer	I don't want to answer
2021-02-18 02:37:16	Yes	18-24	Single	Other	154	53	Yes	Female	Yes, definitely	Yes, definitely	Yes, definitely	Almost	15-20 hours (approximately 4 hours per day)	26-30 hours (approximately 6 hours per day)	more than 30 hours (more than 6 hours per day)	no never	15-20 hours (approximately 4 hours per day)	more than 30 hours (more than 6 hours per day)	more than 30 hours (more than 6 hours per day)	2-3 months	9 hours	Yes	A combination of sitting and standing up	By car or taxi	1	2	3	4	half an hour	From an hour to less than two hours	half an hour	4 hours to 8 hours	1	3	1	1	1	1	1	4 hours to 8 hours	4 hours to 8 hours	half an hour	half an hour	half an hour	half an hour	half an hour	No	1-3 times a month	1-3 times a month
2021-02-18 02:47:12	Yes	18-24	Single	Other	179	81	Yes	Male	Yes, definitely	Yes, definitely	Almost	Yes, definitely	Less than 15 hours (about 3 hours per day)	Less than 15 hours (about 3 hours per day)	Less than 15 hours (about 3 hours per day)	sometimes	15-20 hours (approximately 4 hours per day)	Less than 15 hours (about 3 hours per day)	Less than 15 hours (about 3 hours per day)	2-3 months	Less than 5 hours	Yes	Almost sitting	By car or taxi	3	I don't know	5	I don't know	I don't know	I don't know	2 to 4 hours	I don't know	7	7	7	5	1	3	I don't know	4 hours to 8 hours	4 hours to 8 hours	4 hours to 8 hours	I don't know	half an hour	2 to 4 hours	I don't know	Yes	4-5 times a week	4-5 times a week
2021-02-18 03:19:59	Yes	18-24	Single	Other	160	85	Yes	Female	Almost	Almost	Yes, definitely	Almost	Less than 15 hours (about 3 hours per day)	15-20 hours (approximately 4 hours per day)	more than 30 hours (more than 6 hours per day)	Almost	21-25 hours (approximately 5 hours per day)	Less than 15 hours (about 3 hours per day)	15-20 hours (approximately 4 hours per day)	less than a month	6 hours	Yes	A combination of sitting and standing up	Bike or bus rides	3	1	4	1	From an hour to less than two hours	4 hours to 8 hours	2 to 4 hours	half an hour	3	3	3	3	2	3	1	From an hour to less than two hours	2 to 4 hours	From an hour to less than two hours	more than 8 hours	2 to 4 hours	From an hour to less than two hours	half an hour	No	1-3 times a month	once a week
2021-02-18 03:33:44	Yes	18-24	Single	Natural Sciences (Physics, Chemistry, Biochemistry ... etc.)	160	52	Yes	Female	Yes, definitely	Yes, definitely	Yes, definitely	Almost	Less than 15 hours (about 3 hours per day)	Less than 15 hours (about 3 hours per day)	26-30 hours (approximately 6 hours per day)	no never	more than 30 hours (more than 6 hours per day)	Less than 15 hours (about 3 hours per day)	15-20 hours (approximately 4 hours per day)	less than a month	10 hours or more	No	Almost sitting	By car or taxi	I don't know	I don't know	5	I don't know	I don't know	I don't know	half an hour	I don't know	7	7	4	7	1	2	3	more than 8 hours	more than 8 hours	From an hour to less than two hours	From an hour to less than two hours	From an hour to less than two hours	half an hour	half an hour	Yes	1-3 times a month	1-3 times a month
2021-02-18 05:09:05	Yes	18-24	Single	Humanities (media, languages, law....etc)	168	64	No	Female	Yes, definitely	no never	Yes, definitely	rarely	Less than 15 hours (about 3 hours per day)	21-25 hours (approximately 5 hours per day)	26-30 hours (approximately 6 hours per day)	sometimes	Less than 15 hours (about 3 hours per day)	21-25 hours (approximately 5 hours per day)	21-25 hours (approximately 5 hours per day)	less than a month	Less than 5 hours	No	A combination of sitting and standing up	By car or taxi	1	1	1	1	half an hour	4 hours to 8 hours	4 hours to 8 hours	4 hours to 8 hours	1	1	5	5	2	5	2	half an hour	half an hour	more than 8 hours	more than 8 hours	half an hour	half an hour	half an hour	No	once a week	once a week
2021-02-18 07:41:06	Yes	18-24	Single	Natural Sciences (Physics, Chemistry, Biochemistry ... etc.)	160	52	Yes	Female	Yes, definitely	Yes, definitely	Yes, definitely	Almost	Less than 15 hours (about 3 hours per day)	Less than 15 hours (about 3 hours per day)	26-30 hours (approximately 6 hours per day)	no never	more than 30 hours (more than 6 hours per day)	Less than 15 hours (about 3 hours per day)	15-20 hours (approximately 4 hours per day)	less than a month	10 hours or more	No	Almost sitting	By car or taxi	I don't know	I don't know	5	I don't know	I don't know	I don't know	half an hour	I don't know	7	7	4	7	1	2	3	more than 8 hours	more than 8 hours	From an hour to less than two hours	From an hour to less than two hours	From an hour to less than two hours	half an hour	half an hour	Yes	1-3 times a month	1-3 times a month
2021-02-18 07:56:43	Yes	18-24	Single	Other	153	45	Yes	Female	Yes, definitely	Yes, definitely	Yes, definitely	Almost	Less than 15 hours (about 3 hours per day)	Less than 15 hours (about 3 hours per day)	more than 30 hours (more than 6 hours per day)	no never	15-20 hours (approximately 4 hours per day)	Less than 15 hours (about 3 hours per day)	Less than 15 hours (about 3 hours per day)	less than a month	I don't know	No	Almost sitting	By car or taxi	I don't know	I don't know	3	I don't know	I don't know	I don't know	From an hour to less than two hours	I don't know	I don't know	7	I don't know	2	1	1	6	I don't want to answer	2 to 4 hours	I don't know	half an hour	From an hour to less than two hours	I don't know	I don't know	I don't know	I don't know	I don't know
2021-02-18 08:27:43	Yes	18-24	Married	Other	160	53	Yes	Female	Yes, definitely	sometimes	Almost	sometimes	21-25 hours (approximately 5 hours per day)	Less than 15 hours (about 3 hours per day)	21-25 hours (approximately 5 hours per day)	rarely	Less than 15 hours (about 3 hours per day)	15-20 hours (approximately 4 hours per day)	21-25 hours (approximately 5 hours per day)	less than a month	Less than 5 hours	I don't know	Heavy manual labor	By car or taxi	1	I don't want to answer	1	I don't want to answer	I don't know	I don't know	half an hour	I don't want to answer	1	2	5	2	1	1	I don't want to answer	half an hour	half an hour	2 to 4 hours	4 hours to 8 hours	4 hours to 8 hours	From an hour to less than two hours	I don't want to answer	No	1-3 times a month	once a week
2021-02-18 08:52:09	Yes	18-24	Single	Health sciences (medicine, pharmacy, applied medical sciences, dentistry)	152	47	Yes	Female	Almost	sometimes	sometimes	Almost	Less than 15 hours (about 3 hours per day)	Less than 15 hours (about 3 hours per day)	15-20 hours (approximately 4 hours per day)	Almost	15-20 hours (approximately 4 hours per day)	15-20 hours (approximately 4 hours per day)	Less than 15 hours (about 3 hours per day)	2-3 months	9 hours	No	Some physical activity	By car or taxi	3	3	2	3	half an hour	half an hour	From an hour to less than two hours	half an hour	1	6	2	4	7	5	3	half an hour	From an hour to less than two hours	2 to 4 hours	4 hours to 8 hours	I don't want to answer	more than 8 hours	I don't know	No	4-5 times a week	2-3 times a week
2021-02-18 09:56:45	Yes	18-24	Single	Health sciences (medicine, pharmacy, applied medical sciences, dentistry)	160	60	Yes	Female	Almost	Yes, definitely	Yes, definitely	sometimes	Less than 15 hours (about 3 hours per day)	15-20 hours (approximately 4 hours per day)	more than 30 hours (more than 6 hours per day)	no never	more than 30 hours (more than 6 hours per day)	Less than 15 hours (about 3 hours per day)	15-20 hours (approximately 4 hours per day)	less than a month	Less than 5 hours	No	A combination of sitting and standing up	By car or taxi	1	1	5	1	half an hour	half an hour	half an hour	half an hour	3	6	1	1	1	1	1	From an hour to less than two hours	4 hours to 8 hours	half an hour, From an hour to less than two hours	half an hour	half an hour	half an hour	half an hour	No	1-3 times a month	1-3 times a month
2021-02-18 10:02:57	Yes	18-24	Single	Health sciences (medicine, pharmacy, applied medical sciences, dentistry)	166	57	Yes	Female	no never	Yes, definitely	Yes, definitely	sometimes	Less than 15 hours (about 3 hours per day)	Less than 15 hours (about 3 hours per day)	21-25 hours (approximately 5 hours per day)	Yes, definitely	15-20 hours (approximately 4 hours per day)	Less than 15 hours (about 3 hours per day)	Less than 15 hours (about 3 hours per day)	2-3 months	Less than 5 hours	Yes	Almost sitting	By car or taxi	1	1	5	1	half an hour	half an hour	half an hour	half an hour	1	5	1	1	2	1	1	half an hour	more than 8 hours	half an hour	From an hour to less than two hours	From an hour to less than two hours, 2 to 4 hours	half an hour	half an hour	Yes	2-3 times a week	2-3 times a week
2021-02-18 10:06:25	Yes	18-24	Single	Health sciences (medicine, pharmacy, applied medical sciences, dentistry)	159	65	Yes	Female	rarely	sometimes	no never	sometimes	Less than 15 hours (about 3 hours per day)	Less than 15 hours (about 3 hours per day)	more than 30 hours (more than 6 hours per day)	no never	more than 30 hours (more than 6 hours per day)	Less than 15 hours (about 3 hours per day)	Less than 15 hours (about 3 hours per day)	less than a month	7 hours	Yes	Almost sitting	By car or taxi	1	1	4	1	half an hour	half an hour	From an hour to less than two hours	half an hour	1	4	1	1	1	1	1	half an hour	4 hours to 8 hours	half an hour	half an hour	half an hour	half an hour	half an hour	No	1-3 times a month	1-3 times a month
2021-02-18 10:40:52	Yes	18-24	Single	Other	155	45	Yes	Female	Almost	Yes, definitely	Yes, definitely	Yes, definitely	Less than 15 hours (about 3 hours per day)	Less than 15 hours (about 3 hours per day)	26-30 hours (approximately 6 hours per day)	sometimes	more than 30 hours (more than 6 hours per day)	Less than 15 hours (about 3 hours per day)	Less than 15 hours (about 3 hours per day)	less than a month	7 hours	Yes	Some physical activity	By car or taxi	1	1	7	1	I don't know	half an hour	half an hour	half an hour	1	2	5	2	1	2	3	half an hour	From an hour to less than two hours	2 to 4 hours	half an hour	From an hour to less than two hours	From an hour to less than two hours	From an hour to less than two hours	No	1-3 times a month	1-3 times a month
2021-02-18 11:57:13	Yes	18-24	Single	Health sciences (medicine, pharmacy, applied medical sciences, dentistry)	154	75	Yes	Female	Almost	Yes, definitely	Yes, definitely	Almost	Less than 15 hours (about 3 hours per day)	Less than 15 hours (about 3 hours per day)	15-20 hours (approximately 4 hours per day)	sometimes	15-20 hours (approximately 4 hours per day)	15-20 hours (approximately 4 hours per day)	15-20 hours (approximately 4 hours per day)	less than a month	Less than 5 hours	Yes	Almost sitting	By car or taxi	2	1	6	I don't want to answer	4 hours to 8 hours	4 hours to 8 hours	4 hours to 8 hours	4 hours to 8 hours	3	3	3	3	3	3	3	From an hour to less than two hours	From an hour to less than two hours	From an hour to less than two hours	2 to 4 hours	2 to 4 hours	2 to 4 hours	2 to 4 hours	No	once a week	once a week
2021-02-18 11:59:49	No	18-24	Single	Other	160	67	Yes	Female	Yes, definitely	no never	Yes, definitely	sometimes	Less than 15 hours (about 3 hours per day)	Less than 15 hours (about 3 hours per day)	more than 30 hours (more than 6 hours per day)	Yes, definitely	more than 30 hours (more than 6 hours per day)	Less than 15 hours (about 3 hours per day)	more than 30 hours (more than 6 hours per day)	2-3 months	7 hours	Yes	A combination of sitting and standing up	By car or taxi	5	I don't want to answer	7	I don't want to answer	half an hour	From an hour to less than two hours	From an hour to less than two hours	From an hour to less than two hours	1	1	1	1	1	1	1	half an hour	half an hour	half an hour	half an hour	half an hour	half an hour	half an hour	No	1-3 times a month	1-3 times a month
2021-02-18 12:08:23	Yes	18-24	Single	Health sciences (medicine, pharmacy, applied medical sciences, dentistry)	166	75	Yes	Female	Almost	Yes, definitely	Almost	Almost	15-20 hours (approximately 4 hours per day)	Less than 15 hours (about 3 hours per day)	Less than 15 hours (about 3 hours per day)	no never	21-25 hours (approximately 5 hours per day)	15-20 hours (approximately 4 hours per day)	Less than 15 hours (about 3 hours per day)	7-12 months	8 hours	Yes	Almost sitting	By car or taxi	1	1	7	1	half an hour	half an hour	half an hour	half an hour	1	4	2	3	1	1	1	4 hours to 8 hours	4 hours to 8 hours	From an hour to less than two hours	From an hour to less than two hours	half an hour	half an hour	half an hour	No	2-3 times a week	once a week
2021-02-18 12:13:04	Yes	18-24	Single	Health sciences (medicine, pharmacy, applied medical sciences, dentistry)	150	73	Yes	Female	Yes, definitely	Yes, definitely	Yes, definitely	no never	Less than 15 hours (about 3 hours per day)	15-20 hours (approximately 4 hours per day)	15-20 hours (approximately 4 hours per day)	sometimes	26-30 hours (approximately 6 hours per day)	Less than 15 hours (about 3 hours per day)	15-20 hours (approximately 4 hours per day)	2-3 months	I don't know	Yes	Almost sitting	By car or taxi	1	1	7	1	From an hour to less than two hours	From an hour to less than two hours	half an hour	From an hour to less than two hours	7	7	1	7	1	1	1	2 to 4 hours	2 to 4 hours	half an hour	2 to 4 hours	From an hour to less than two hours	half an hour	half an hour	No	1-3 times a month	1-3 times a month
2021-02-18 13:18:22	Yes	18-24	Married	Other	159	72	Yes	Female	no never	no never	Almost	sometimes	Less than 15 hours (about 3 hours per day)	Less than 15 hours (about 3 hours per day)	Less than 15 hours (about 3 hours per day)	Almost	26-30 hours (approximately 6 hours per day)	Less than 15 hours (about 3 hours per day)	Less than 15 hours (about 3 hours per day)	4-6 months	9 hours	I don't know	A combination of sitting and standing up	By car or taxi	2	1	5 to 6	1	From an hour to less than two hours	half an hour	From an hour to less than two hours	half an hour	5	5	1	7, I don't know, I don't want to answer	1	1 to 2 to 4	1	half an hour	half an hour	half an hour	half an hour	half an hour	half an hour	half an hour	No	1-3 times a month	1-3 times a month
2021-02-18 14:58:02	Yes	18-24	Single	Health sciences (medicine, pharmacy, applied medical sciences, dentistry)	147	46	Yes	Female	Yes, definitely	Almost	sometimes	sometimes	Less than 15 hours (about 3 hours per day)	Less than 15 hours (about 3 hours per day)	21-25 hours (approximately 5 hours per day)	no never	26-30 hours (approximately 6 hours per day)	15-20 hours (approximately 4 hours per day)	Less than 15 hours (about 3 hours per day)	less than a month	Less than 5 hours	Yes	Almost sitting	By car or taxi	I don't know	I don't know	3	I don't know	From an hour to less than two hours	I don't know	half an hour, I don't know	I don't know	3	7	I don't want to answer	3	I don't know	1	I don't know	half an hour	4 hours to 8 hours	I don't know	half an hour	I don't know	I don't know	I don't know	No	I don't want to answer	1-3 times a month
2021-02-18 15:14:09	Yes	18-24	Single	Other	160	45	Yes	Female	Almost	no never	Yes, definitely	Almost	15-20 hours (approximately 4 hours per day)	21-25 hours (approximately 5 hours per day)	Less than 15 hours (about 3 hours per day)	Almost	15-20 hours (approximately 4 hours per day)	Less than 15 hours (about 3 hours per day)	21-25 hours (approximately 5 hours per day)	2-3 months	8 hours	Yes	Almost sitting	By car or taxi	2	4	5	3	4 hours to 8 hours	From an hour to less than two hours	4 hours to 8 hours	2 to 4 hours	4	5	1	5	3	2 to 4	2	From an hour to less than two hours	From an hour to less than two hours	half an hour	2 to 4 hours	From an hour to less than two hours	From an hour to less than two hours	From an hour to less than two hours	No	once a week	once a week
2021-02-18 20:08:00	Yes	18-24	Single	Health sciences (medicine, pharmacy, applied medical sciences, dentistry)	151	56	Yes	Female	Yes, definitely	Yes, definitely	Almost	Yes, definitely	Less than 15 hours (about 3 hours per day)	Less than 15 hours (about 3 hours per day)	26-30 hours (approximately 6 hours per day)	rarely	26-30 hours (approximately 6 hours per day)	Less than 15 hours (about 3 hours per day)	Less than 15 hours (about 3 hours per day)	2-3 months	8 hours	Yes	A combination of sitting and standing up	By car or taxi	I don't want to answer	I don't want to answer	5	I don't want to answer	I don't want to answer	half an hour	half an hour	half an hour	5	7	1	1	1	1	1	half an hour	more than 8 hours	From an hour to less than two hours	half an hour	half an hour	half an hour	half an hour	No	1-3 times a month	I don't want to answer
2021-02-19 02:22:34	Yes	18-24	Single	Health sciences (medicine, pharmacy, applied medical sciences, dentistry)	154	75	Yes	Female	Almost	Yes, definitely	Yes, definitely	Almost	Less than 15 hours (about 3 hours per day)	Less than 15 hours (about 3 hours per day)	15-20 hours (approximately 4 hours per day)	sometimes	15-20 hours (approximately 4 hours per day)	15-20 hours (approximately 4 hours per day)	15-20 hours (approximately 4 hours per day)	less than a month	Less than 5 hours	Yes	Almost sitting	By car or taxi	2	1	6	I don't want to answer	4 hours to 8 hours	4 hours to 8 hours	4 hours to 8 hours	4 hours to 8 hours	3	3	3	3	3	3	3	From an hour to less than two hours	From an hour to less than two hours	From an hour to less than two hours	2 to 4 hours	2 to 4 hours	2 to 4 hours	2 to 4 hours	No	once a week	once a week
2021-02-19 03:14:07	Yes	18-24	Single	Other	154	45	Yes	Female	Yes, definitely	no never	Yes, definitely	Yes, definitely	Less than 15 hours (about 3 hours per day)	15-20 hours (approximately 4 hours per day)	26-30 hours (approximately 6 hours per day)	rarely	26-30 hours (approximately 6 hours per day)	26-30 hours (approximately 6 hours per day)	26-30 hours (approximately 6 hours per day)	less than a month	10 hours or more	No	Almost sitting	By car or taxi	I don't want to answer	I don't want to answer	1	I don't want to answer	I don't want to answer	I don't want to answer	half an hour	I don't want to answer	1 to 2	1 to 2	1 to 2	I don't want to answer	I don't want to answer	1 to 3, I don't want to answer	I don't want to answer	I don't want to answer	half an hour	I don't want to answer	I don't want to answer	I don't want to answer	I don't want to answer	I don't want to answer	No	I don't want to answer	1-3 times a month
2021-02-19 03:19:09	Yes	18-24	Single	Other	151	43	Yes	Female	Yes, definitely	Yes, definitely	Yes, definitely	Yes, definitely	Less than 15 hours (about 3 hours per day)	Less than 15 hours (about 3 hours per day)	26-30 hours (approximately 6 hours per day)	no never	more than 30 hours (more than 6 hours per day)	Less than 15 hours (about 3 hours per day)	more than 30 hours (more than 6 hours per day)	less than a month	10 hours or more	Yes	Heavy manual labor	By car or taxi	I don't know	I don't know	6	I don't know	I don't know	I don't know	From an hour to less than two hours	I don't know	7	7	I don't know	7	1	I don't know	I don't know	2 to 4 hours	2 to 4 hours	half an hour	4 hours to 8 hours	4 hours to 8 hours	4 hours to 8 hours	I don't know	No	1-3 times a month	I don't know
2021-02-19 03:22:40	Yes	18-24	Single	Other	160	37	Yes	Female	rarely	no never	Almost	no never	٢٦ -٣٠ ساعات ( تقريباً ٦ساعات يومياً)	21-25 hours (approximately 5 hours per day)	more than 30 hours (more than 6 hours per day)	sometimes	26-30 hours (approximately 6 hours per day)	26-30 hours (approximately 6 hours per day)	21-25 hours (approximately 5 hours per day)	less than a month	7 hours	Yes	Almost sitting	Bike or bus rides	I don't know	6	I don't know	I don't know	I don't know	From an hour to less than two hours	I don't know	I don't know	1	3	4	1	5	4	4	From an hour to less than two hours	half an hour, From an hour to less than two hours	2 to 4 hours	From an hour to less than two hours	4 hours to 8 hours	4 hours to 8 hours	half an hour, 2 to 4 hours	No	I don't know	I don't know
2021-02-19 03:22:40	Yes	18-24	Single	Humanities (media, languages, law....etc)	153	65	Yes	Female	Yes, definitely	Yes, definitely	Yes, definitely	rarely	Less than 15 hours (about 3 hours per day)	Less than 15 hours (about 3 hours per day)	26-30 hours (approximately 6 hours per day)	sometimes	more than 30 hours (more than 6 hours per day)	Less than 15 hours (about 3 hours per day)	21-25 hours (approximately 5 hours per day)	less than a month	Less than 5 hours	No	A combination of sitting and standing up	by walking	5	1	3	2	half an hour	half an hour	half an hour	half an hour	2	4	3	1	2	3	1	From an hour to less than two hours	4 hours to 8 hours	2 to 4 hours	half an hour	From an hour to less than two hours	From an hour to less than two hours	half an hour	Yes	2-3 times a week	2-3 times a week
2021-02-19 03:40:12	Yes	18-24	Single	Health sciences (medicine, pharmacy, applied medical sciences, dentistry)	145	44	Yes	Female	Almost	Yes, definitely	sometimes	Yes, definitely	Less than 15 hours (about 3 hours per day)	15-20 hours (approximately 4 hours per day)	26-30 hours (approximately 6 hours per day)	rarely	26-30 hours (approximately 6 hours per day)	Less than 15 hours (about 3 hours per day)	15-20 hours (approximately 4 hours per day)	2-3 months	7 hours	Yes	A combination of sitting and standing up	By car or taxi	5	I don't want to answer	5	I don't want to answer	half an hour	I don't want to answer	From an hour to less than two hours	I don't want to answer	I don't want to answer	5	I don't want to answer	4	4	3	I don't want to answer	I don't want to answer	2 to 4 hours	I don't want to answer	2 to 4 hours	I don't want to answer	2 to 4 hours	I don't want to answer	No	I don't want to answer	I don't want to answer
2021-02-19 03:42:34	Yes	18-24	Single	Health sciences (medicine, pharmacy, applied medical sciences, dentistry)	157	63	Yes	Female	sometimes	sometimes	Almost	Almost	Less than 15 hours (about 3 hours per day)	15-20 hours (approximately 4 hours per day)	Less than 15 hours (about 3 hours per day)	sometimes	15-20 hours (approximately 4 hours per day)	Less than 15 hours (about 3 hours per day)	15-20 hours (approximately 4 hours per day)	2-3 months	6 hours	Yes	A combination of sitting and standing up	by walking	4	1	4	3	From an hour to less than two hours	half an hour	half an hour, 2 to 4 hours	half an hour	1	2	2	2	3	2	3	half an hour	From an hour to less than two hours	From an hour to less than two hours	half an hour	half an hour	half an hour	half an hour	No	once a week	1-3 times a month
2021-02-19 03:43:46	Yes	18-24	Single	Other	160	60	Yes	Female	Yes, definitely	Almost	rarely	sometimes	Less than 15 hours (about 3 hours per day)	Less than 15 hours (about 3 hours per day)	15-20 hours (approximately 4 hours per day)	rarely	15-20 hours (approximately 4 hours per day)	Less than 15 hours (about 3 hours per day)	Less than 15 hours (about 3 hours per day)	less than a month	10 hours or more	Yes	Almost sitting	By car or taxi	1	I don't want to answer	I don't know	I don't know	4 hours to 8 hours	4 hours to 8 hours	4 hours to 8 hours	4 hours to 8 hours	7	1	1	1	1	I don't know	1	half an hour	half an hour	half an hour	half an hour	half an hour	half an hour	half an hour	No	1-3 times a month	1-3 times a month
2021-02-19 04:07:54	Yes	18-24	Single	Other	159	45	Yes	Female	Yes, definitely	Yes, definitely	no never	Yes, definitely	Less than 15 hours (about 3 hours per day)	Less than 15 hours (about 3 hours per day)	more than 30 hours (more than 6 hours per day)	no never	26-30 hours (approximately 6 hours per day)	Less than 15 hours (about 3 hours per day)	Less than 15 hours (about 3 hours per day)	2-3 months	7 hours	Yes	Almost sitting	By car or taxi	I don't know	I don't know	I don't know	I don't know	2 to 4 hours	From an hour to less than two hours	From an hour to less than two hours	From an hour to less than two hours	7	2	I don't know	3	2	1	1	2 to 4 hours	half an hour	half an hour	From an hour to less than two hours	From an hour to less than two hours	half an hour	half an hour	No	I don't want to answer	I don't want to answer
2021-02-19 04:28:22	Yes	18-24	Single	Health sciences (medicine, pharmacy, applied medical sciences, dentistry)	162	53	Yes	Female	Yes, definitely	Yes, definitely	sometimes	rarely	Less than 15 hours (about 3 hours per day)	Less than 15 hours (about 3 hours per day)	more than 30 hours (more than 6 hours per day)	no never	26-30 hours (approximately 6 hours per day)	more than 30 hours (more than 6 hours per day)	Less than 15 hours (about 3 hours per day)	less than a month	10 hours or more	Yes	Almost sitting	By car or taxi	1	I don't know	1	I don't want to answer	I don't want to answer	I don't want to answer	I don't want to answer	I don't want to answer	1	1	1	7	I don't want to answer	I don't want to answer	I don't want to answer	I don't want to answer	I don't want to answer	I don't want to answer	I don't want to answer	I don't want to answer	I don't want to answer	I don't want to answer	No	I don't want to answer	I don't want to answer
2021-02-19 04:36:06	Yes	18-24	Single	Humanities (media, languages, law....etc)	155	57	Yes	Female	Almost	Almost	Yes, definitely	Almost	Less than 15 hours (about 3 hours per day)	Less than 15 hours (about 3 hours per day)	21-25 hours (approximately 5 hours per day)	no never	more than 30 hours (more than 6 hours per day)	Less than 15 hours (about 3 hours per day)	Less than 15 hours (about 3 hours per day)	less than a month	Less than 5 hours	No	Almost sitting	By car or taxi	1	1	5	I don't know	I don't know	I don't know	From an hour to less than two hours	I don't know	1	4	4	7	2	2	1	I don't know	From an hour to less than two hours	2 to 4 hours	2 to 4 hours	From an hour to less than two hours	I don't know	I don't know	No	once a week	1-3 times a month
2021-02-19 04:56:22	Yes	18-24	Single	Humanities (media, languages, law....etc)	165	50	Yes	Female	no never	Yes, definitely	Yes, definitely	Yes, definitely	Less than 15 hours (about 3 hours per day)	15-20 hours (approximately 4 hours per day)	26-30 hours (approximately 6 hours per day)	sometimes	21-25 hours (approximately 5 hours per day)	Less than 15 hours (about 3 hours per day)	15-20 hours (approximately 4 hours per day)	less than a month	7 hours	Yes	Almost sitting	By car or taxi	I don't know	1	I don't know	I don't know	I don't know	more than 8 hours	half an hour, I don't know	I don't know	1	4	2	2	I don't know	I don't know	I don't know	From an hour to less than two hours	From an hour to less than two hours	From an hour to less than two hours	2 to 4 hours	half an hour	From an hour to less than two hours	From an hour to less than two hours	No	1-3 times a month	1-3 times a month
2021-02-19 05:32:27	Yes	18-24	Single	Other	164	65	Yes	Female	sometimes	Yes, definitely	Yes, definitely	Almost	Less than 15 hours (about 3 hours per day)	Less than 15 hours (about 3 hours per day)	Less than 15 hours (about 3 hours per day)	sometimes	21-25 hours (approximately 5 hours per day)	Less than 15 hours (about 3 hours per day)	21-25 hours (approximately 5 hours per day)	less than a month	8 hours	No	Some physical activity	By car or taxi	I don't know	I don't know	7	I don't know	I don't know	I don't know	half an hour	I don't know	7	7	I don't know	4	2	2	1	more than 8 hours	more than 8 hours	4 hours to 8 hours, I don't know	4 hours to 8 hours	4 hours to 8 hours	4 hours to 8 hours	2 to 4 hours	Yes	2-3 times a week	1-3 times a month
2021-02-19 05:42:35	Yes	18-24	Single	Other	154	61	Yes	Female	Almost	Almost	Yes, definitely	Almost	21-25 hours (approximately 5 hours per day)	Less than 15 hours (about 3 hours per day)	15-20 hours (approximately 4 hours per day)	Almost	26-30 hours (approximately 6 hours per day)	Less than 15 hours (about 3 hours per day)	15-20 hours (approximately 4 hours per day)	2-3 months	6 hours	Yes	Almost sitting	By car or taxi	I don't want to answer	I don't want to answer	I don't want to answer	I don't want to answer	I don't want to answer	I don't want to answer	half an hour	I don't want to answer	6	7	2	6	I don't know, I don't want to answer	I don't want to answer	I don't want to answer	2 to 4 hours	4 hours to 8 hours	From an hour to less than two hours	From an hour to less than two hours	I don't want to answer	I don't want to answer	I don't want to answer	Yes	I don't want to answer	6-7 times a week
2021-02-19 06:16:56	Yes	18-24	Single	Health sciences (medicine, pharmacy, applied medical sciences, dentistry)	157	64	Yes	Female	Yes, definitely	Yes, definitely	Almost	Yes, definitely	Less than 15 hours (about 3 hours per day)	15-20 hours (approximately 4 hours per day)	26-30 hours (approximately 6 hours per day)	rarely	more than 30 hours (more than 6 hours per day)	Less than 15 hours (about 3 hours per day)	15-20 hours (approximately 4 hours per day)	less than a month	6 hours	Yes	A combination of sitting and standing up	By car or taxi	I don't know	I don't know	7	I don't know	I don't know	I don't know	From an hour to less than two hours	I don't know	I don't know	7	4	2	5	2	I don't know	I don't know	4 hours to 8 hours	2 to 4 hours	From an hour to less than two hours	more than 8 hours	half an hour	I don't know	No	1-3 times a month	2-3 times a week
2021-02-19 06:25:59	Yes	18-24	Single	Humanities (media, languages, law....etc)	155	57	Yes	Female	Almost	Almost	Yes, definitely	Almost	Less than 15 hours (about 3 hours per day)	Less than 15 hours (about 3 hours per day)	21-25 hours (approximately 5 hours per day)	no never	more than 30 hours (more than 6 hours per day)	Less than 15 hours (about 3 hours per day)	Less than 15 hours (about 3 hours per day)	less than a month	Less than 5 hours	No	Almost sitting	By car or taxi	1	1	5	I don't know	I don't know	I don't know	From an hour to less than two hours	I don't know	1	4	4	7	2	2	1	I don't know	From an hour to less than two hours	2 to 4 hours	2 to 4 hours	From an hour to less than two hours	I don't know	I don't know	No	once a week	1-3 times a month
2021-02-19 08:47:37	Yes	18-24	Single	Humanities (media, languages, law....etc)	156	59	Yes	Female	Yes, definitely	Yes, definitely	Yes, definitely	sometimes	Less than 15 hours (about 3 hours per day)	Less than 15 hours (about 3 hours per day)	26-30 hours (approximately 6 hours per day)	Yes, definitely	21-25 hours (approximately 5 hours per day)	more than 30 hours (more than 6 hours per day)	Less than 15 hours (about 3 hours per day)	2-3 months	7 hours	No	A combination of sitting and standing up	By car or taxi	1	1	4	1	half an hour	half an hour	half an hour	half an hour	1	1	2	3	4	1	1	From an hour to less than two hours	From an hour to less than two hours	half an hour	From an hour to less than two hours	half an hour, 2 to 4 hours	From an hour to less than two hours	half an hour	No	1-3 times a month	2-3 times a week
2021-02-19 09:02:12	Yes	18-24	Single	Other	157	65	Yes	Female	Yes, definitely	no never	Yes, definitely	Yes, definitely	Less than 15 hours (about 3 hours per day)	15-20 hours (approximately 4 hours per day)	21-25 hours (approximately 5 hours per day)	Yes, definitely	21-25 hours (approximately 5 hours per day)	Less than 15 hours (about 3 hours per day)	15-20 hours (approximately 4 hours per day)	less than a month	6 hours	No	Almost standing and walking	By car or taxi	5	1	7	1	From an hour to less than two hours	half an hour	From an hour to less than two hours	half an hour	1	7	3	6	1	3	1	half an hour	4 hours to 8 hours	From an hour to less than two hours	2 to 4 hours	half an hour	half an hour	half an hour	Yes	2-3 times a week	4-5 times a week
2021-02-19 09:35:15	Yes	18-24	Single	Other	160	52	Yes	Female	Yes, definitely	sometimes	sometimes	Yes, definitely	Less than 15 hours (about 3 hours per day)	Less than 15 hours (about 3 hours per day)	26-30 hours (approximately 6 hours per day)	sometimes	21-25 hours (approximately 5 hours per day)	Less than 15 hours (about 3 hours per day)	Less than 15 hours (about 3 hours per day)	less than a month	8 hours	Yes	A combination of sitting and standing up	By car or taxi	1	5	5	5	half an hour	From an hour to less than two hours	From an hour to less than two hours	From an hour to less than two hours	1	7	1	1	1	1	1	half an hour	4 hours to 8 hours	half an hour	From an hour to less than two hours	half an hour	half an hour	half an hour	No	1-3 times a month	1-3 times a month
2021-02-19 10:59:05	Yes	18-24	Single	Humanities (media, languages, law....etc)	156	59	Yes	Female	Yes, definitely	Yes, definitely	Yes, definitely	sometimes	Less than 15 hours (about 3 hours per day)	Less than 15 hours (about 3 hours per day)	26-30 hours (approximately 6 hours per day)	Yes, definitely	21-25 hours (approximately 5 hours per day)	more than 30 hours (more than 6 hours per day)	Less than 15 hours (about 3 hours per day)	2-3 months	7 hours	No	A combination of sitting and standing up	By car or taxi	1	1	4	1	half an hour	half an hour	half an hour	half an hour	1	1	2	3	4	1	1	From an hour to less than two hours	From an hour to less than two hours	half an hour	From an hour to less than two hours	half an hour, 2 to 4 hours	From an hour to less than two hours	half an hour	No	1-3 times a month	2-3 times a week
2021-02-19 12:19:03	Yes	18-24	Single	Other	164	46	Yes	Female	Yes, definitely	Almost	Yes, definitely	Almost	15-20 hours (approximately 4 hours per day)	Less than 15 hours (about 3 hours per day)	21-25 hours (approximately 5 hours per day)	rarely	21-25 hours (approximately 5 hours per day)	Less than 15 hours (about 3 hours per day)	Less than 15 hours (about 3 hours per day)	2-3 months	10 hours or more	Yes	Almost sitting	By car or taxi	5	1	6	I don't know	I don't know	I don't know	From an hour to less than two hours	I don't know	1	7	2	1	2	1	1	half an hour	4 hours to 8 hours	From an hour to less than two hours	half an hour	From an hour to less than two hours, 2 to 4 hours	From an hour to less than two hours	I don't know	No	I don't want to answer	I don't want to answer
2021-02-19 13:28:39	Yes	18-24	Single	Other	160	52	Yes	Female	Yes, definitely	sometimes	sometimes	Yes, definitely	Less than 15 hours (about 3 hours per day)	Less than 15 hours (about 3 hours per day)	26-30 hours (approximately 6 hours per day)	sometimes	21-25 hours (approximately 5 hours per day)	Less than 15 hours (about 3 hours per day)	Less than 15 hours (about 3 hours per day)	less than a month	8 hours	Yes	A combination of sitting and standing up	By car or taxi	1	5	5	5	half an hour	From an hour to less than two hours	From an hour to less than two hours	From an hour to less than two hours	1	7	1	1	1	1	1	half an hour	4 hours to 8 hours	half an hour	From an hour to less than two hours	half an hour	half an hour	half an hour	No	1-3 times a month	1-3 times a month
2021-02-19 14:18:14	Yes	18-24	Married	Other	155	50	Yes	Female	Yes, definitely	Yes, definitely	rarely	Yes, definitely	Less than 15 hours (about 3 hours per day)	Less than 15 hours (about 3 hours per day)	Less than 15 hours (about 3 hours per day)	no never	26-30 hours (approximately 6 hours per day)	Less than 15 hours (about 3 hours per day)	21-25 hours (approximately 5 hours per day)	less than a month	6 hours	Yes	Almost sitting	By car or taxi	I don't know	I don't know	I don't know	I don't know	I don't know	I don't know	half an hour, I don't know	half an hour, I don't know	3	4	1	4	1	1	1	2 to 4 hours	4 hours to 8 hours	half an hour	2 to 4 hours	half an hour	half an hour	half an hour	No	1-3 times a month	1-3 times a month
2021-02-19 14:22:48	Yes	18-24	Single	Humanities (media, languages, law....etc)	150	51	Yes	Female	sometimes	Almost	Yes, definitely	no never	Less than 15 hours (about 3 hours per day)	Less than 15 hours (about 3 hours per day)	21-25 hours (approximately 5 hours per day)	Almost	26-30 hours (approximately 6 hours per day)	Less than 15 hours (about 3 hours per day)	Less than 15 hours (about 3 hours per day)	2-3 months	8 hours	Yes	A combination of sitting and standing up	By car or taxi	I don't want to answer	I don't want to answer	1	I don't want to answer	I don't want to answer	I don't want to answer	half an hour	I don't want to answer	I don't know	2	I don't want to answer	2	I don't want to answer	1	I don't want to answer	I don't want to answer	I don't want to answer	I don't want to answer	I don't want to answer	I don't want to answer	I don't want to answer	I don't want to answer	No	once a week	once a week
2021-02-19 15:08:30	Yes	18-24	Single	Other	160	60	Yes	Female	Yes, definitely	Almost	rarely	sometimes	Less than 15 hours (about 3 hours per day)	Less than 15 hours (about 3 hours per day)	15-20 hours (approximately 4 hours per day)	rarely	15-20 hours (approximately 4 hours per day)	Less than 15 hours (about 3 hours per day)	Less than 15 hours (about 3 hours per day)	less than a month	10 hours or more	Yes	Almost sitting	By car or taxi	1	I don't want to answer	I don't know	I don't know	4 hours to 8 hours	4 hours to 8 hours	4 hours to 8 hours	4 hours to 8 hours	7	1	1	1	1	I don't know	1	half an hour	half an hour	half an hour	half an hour	half an hour	half an hour	half an hour	No	1-3 times a month	1-3 times a month
2021-02-19 15:38:51	Yes	18-24	Single	Other	152	44	Yes	Female	sometimes	no never	Yes, definitely	sometimes	Less than 15 hours (about 3 hours per day)	Less than 15 hours (about 3 hours per day)	Less than 15 hours (about 3 hours per day)	Almost	15-20 hours (approximately 4 hours per day)	Less than 15 hours (about 3 hours per day)	15-20 hours (approximately 4 hours per day)	less than a month	7 hours	No	A combination of sitting and standing up	By car or taxi	2	3	3	1	From an hour to less than two hours	half an hour	From an hour to less than two hours	half an hour	2	3	4	2	2	4	1	From an hour to less than two hours	From an hour to less than two hours	From an hour to less than two hours	half an hour	From an hour to less than two hours	From an hour to less than two hours	half an hour	Yes	1-3 times a month	1-3 times a month
2021-02-19 15:43:13	Yes	18-24	Single	Health sciences (medicine, pharmacy, applied medical sciences, dentistry)	166	51	Yes	Female	Yes, definitely	Yes, definitely	Almost	Yes, definitely	Less than 15 hours (about 3 hours per day)	15-20 hours (approximately 4 hours per day)	more than 30 hours (more than 6 hours per day)	no never	26-30 hours (approximately 6 hours per day)	Less than 15 hours (about 3 hours per day)	15-20 hours (approximately 4 hours per day)	2-3 months	Less than 5 hours	Yes	Almost sitting	By car or taxi	2	1	I don't want to answer	I don't want to answer	half an hour	half an hour	I don't want to answer	I don't want to answer	7	6	5	7	2	1	1	4 hours to 8 hours	2 to 4 hours	From an hour to less than two hours	2 to 4 hours	From an hour to less than two hours	half an hour	half an hour	Yes	2-3 times a week	once a week
2021-02-19 16:00:19	Yes	18-24	Married	Humanities (media, languages, law....etc)	156	52	Yes	Female	Almost	Yes, definitely	Yes, definitely	Yes, definitely	Less than 15 hours (about 3 hours per day)	Less than 15 hours (about 3 hours per day)	21-25 hours (approximately 5 hours per day)	sometimes	15-20 hours (approximately 4 hours per day)	Less than 15 hours (about 3 hours per day)	Less than 15 hours (about 3 hours per day)	less than a month	10 hours or more	No	A combination of sitting and standing up	By car or taxi	7	7	7	7	I don't know	I don't know	From an hour to less than two hours	I don't know	1	1	1	1	1	1	1	half an hour	half an hour	half an hour	half an hour	half an hour	half an hour	half an hour	No	1-3 times a month	1-3 times a month
2021-02-19 18:13:05	Yes	more than 27	Married	Health sciences (medicine, pharmacy, applied medical sciences, dentistry)	164	60	No	Female	Almost	Yes, definitely	Yes, definitely	Almost	Less than 15 hours (about 3 hours per day)	Less than 15 hours (about 3 hours per day)	15-20 hours (approximately 4 hours per day)	Yes, definitely	Less than 15 hours (about 3 hours per day)	Less than 15 hours (about 3 hours per day)	Less than 15 hours (about 3 hours per day)	2-3 months	8 hours	Yes	Almost standing and walking	By car or taxi	2	2	1	2	From an hour to less than two hours	half an hour	half an hour	From an hour to less than two hours	2 to 4	4	4	1 to 3	2	3	2 to 4	half an hour, 2 to 4 hours	half an hour, 2 to 4 hours	half an hour, From an hour to less than two hours	half an hour, 2 to 4 hours	half an hour, From an hour to less than two hours, 2 to 4 hours	half an hour, 2 to 4 hours	half an hour, 2 to 4 hours	Yes	once a week	4-5 times a week
2021-02-19 18:27:08	Yes	18-24	Single	Other	175	76	Yes	Male	Almost	Yes, definitely	Yes, definitely	Almost	Less than 15 hours (about 3 hours per day)	21-25 hours (approximately 5 hours per day)	Less than 15 hours (about 3 hours per day)	sometimes	Less than 15 hours (about 3 hours per day)	Less than 15 hours (about 3 hours per day)	Less than 15 hours (about 3 hours per day)	less than a month	7 hours	Yes	A combination of sitting and standing up	By car or taxi	1	1	5	1	From an hour to less than two hours	From an hour to less than two hours	half an hour	half an hour	2	3	3	1	3	3	3	From an hour to less than two hours	2 to 4 hours	2 to 4 hours	half an hour	From an hour to less than two hours	From an hour to less than two hours	half an hour	Yes	2-3 times a week	1-3 times a month
2021-02-19 18:33:29	Yes	more than 27	Married	Other	164	70	No	Female	Yes, definitely	no never	Yes, definitely	Yes, definitely	Less than 15 hours (about 3 hours per day)	15-20 hours (approximately 4 hours per day)	Less than 15 hours (about 3 hours per day)	Yes, definitely	Less than 15 hours (about 3 hours per day)	Less than 15 hours (about 3 hours per day)	Less than 15 hours (about 3 hours per day)	less than a month	8 hours	No	Almost sitting	I don't want to answer	1	1	1	1	half an hour	half an hour	half an hour	half an hour	1	1	1	1	1	1	1	4 hours to 8 hours	4 hours to 8 hours	4 hours to 8 hours	4 hours to 8 hours	4 hours to 8 hours	4 hours to 8 hours	4 hours to 8 hours	Yes	I don't want to answer	I don't want to answer
2021-02-19 19:01:23	Yes	18-24	Single	Other	164	65	Yes	Female	sometimes	Yes, definitely	Yes, definitely	Almost	Less than 15 hours (about 3 hours per day)	Less than 15 hours (about 3 hours per day)	Less than 15 hours (about 3 hours per day)	sometimes	21-25 hours (approximately 5 hours per day)	Less than 15 hours (about 3 hours per day)	21-25 hours (approximately 5 hours per day)	less than a month	8 hours	No	Some physical activity	By car or taxi	I don't know	I don't know	7	I don't know	I don't know	I don't know	half an hour	I don't know	7	7	I don't know	4	2	2	1	more than 8 hours	more than 8 hours	4 hours to 8 hours, I don't know	4 hours to 8 hours	4 hours to 8 hours	4 hours to 8 hours	2 to 4 hours	Yes	2-3 times a week	1-3 times a month
2021-02-19 19:13:23	Yes	18-24	Single	Other	173	75	Yes	Male	Yes, definitely	Almost	Almost	sometimes	Less than 15 hours (about 3 hours per day)	Less than 15 hours (about 3 hours per day)	15-20 hours (approximately 4 hours per day)	no never	more than 30 hours (more than 6 hours per day)	Less than 15 hours (about 3 hours per day)	Less than 15 hours (about 3 hours per day)	2-3 months	Less than 5 hours	Yes	A combination of sitting and standing up	By car or taxi	1	1	5	1	From an hour to less than two hours	From an hour to less than two hours	half an hour	From an hour to less than two hours	3	7	1	1	1	7	1	half an hour	From an hour to less than two hours	half an hour	half an hour	half an hour	From an hour to less than two hours	half an hour	Yes	1-3 times a month	4-5 times a week
2021-02-19 19:43:15	Yes	more than 27	Married	Other	180	85	No	Male	no never	Yes, definitely	Yes, definitely	Yes, definitely	Less than 15 hours (about 3 hours per day)	15-20 hours (approximately 4 hours per day)	more than 30 hours (more than 6 hours per day)	Almost	Less than 15 hours (about 3 hours per day)	more than 30 hours (more than 6 hours per day)	21-25 hours (approximately 5 hours per day)	less than a month	7 hours	Yes	Almost standing and walking	By car or taxi	5	I don't know	5	I don't know	2 to 4 hours	From an hour to less than two hours	half an hour	I don't know	5	5	7	3	7	7	5	2 to 4 hours	From an hour to less than two hours	2 to 4 hours	From an hour to less than two hours	half an hour	From an hour to less than two hours	From an hour to less than two hours	Yes	2-3 times a week	6-7 times a week
2021-02-19 19:44:20	Yes	more than 27	Married	Other	186	135	No	Female	Yes, definitely	Almost	sometimes	rarely	Less than 15 hours (about 3 hours per day)	أكثر من ٣٠ ساعات ( اكثر من ٦ساعات يومياً)	more than 30 hours (more than 6 hours per day)	rarely	15-20 hours (approximately 4 hours per day)	Less than 15 hours (about 3 hours per day)	more than 30 hours (more than 6 hours per day)	7-12 months	9 hours	No	A combination of sitting and standing up	By car or taxi	1	1	1	1	half an hour	half an hour	half an hour	half an hour	4	2	1	4	2	1	1	2 to 4 hours	From an hour to less than two hours	half an hour	4 hours to 8 hours	half an hour	half an hour	half an hour	No	once a week	2-3 times a week
2021-02-19 20:24:55	Yes	18-24	Married	Humanities (media, languages, law....etc)	156	52	Yes	Female	Almost	Yes, definitely	Yes, definitely	Yes, definitely	Less than 15 hours (about 3 hours per day)	Less than 15 hours (about 3 hours per day)	21-25 hours (approximately 5 hours per day)	sometimes	15-20 hours (approximately 4 hours per day)	Less than 15 hours (about 3 hours per day)	Less than 15 hours (about 3 hours per day)	less than a month	10 hours or more	No	A combination of sitting and standing up	By car or taxi	7	7	7	7	I don't know	I don't know	From an hour to less than two hours	I don't know	1	1	1	1	1	1	1	half an hour	half an hour	half an hour	half an hour	half an hour	half an hour	half an hour	No	1-3 times a month	1-3 times a month
2021-02-19 20:47:26	Yes	more than 27	Single	Other	150	45	No	Female	no never	Yes, definitely	Yes, definitely	no never	more than 30 hours (more than 6 hours per day)	Less than 15 hours (about 3 hours per day)	Less than 15 hours (about 3 hours per day)	sometimes	Less than 15 hours (about 3 hours per day)	15-20 hours (approximately 4 hours per day)	15-20 hours (approximately 4 hours per day)	less than a month		Yes	Some physical activity	By car or taxi	1	1	1	1	half an hour	half an hour	half an hour	half an hour	1	1	1	1	1	1	1	half an hour	half an hour	half an hour	half an hour	half an hour	half an hour	half an hour	Yes	1-3 times a month	1-3 times a month
2021-02-19 22:21:45	Yes	more than 27	Married	Other	168	63	No	Male	Almost	Almost	Almost	Almost	15-20 hours (approximately 4 hours per day)	Less than 15 hours (about 3 hours per day)	Less than 15 hours (about 3 hours per day)	sometimes	15-20 hours (approximately 4 hours per day)	Less than 15 hours (about 3 hours per day)	21-25 hours (approximately 5 hours per day)	2-3 months	Less than 5 hours	I don't want to answer	Some physical activity	By car or taxi	1	4	1	1	half an hour	half an hour	half an hour	half an hour	1	1	1	1	1	1	1	half an hour	half an hour	half an hour	half an hour	half an hour	half an hour	half an hour	Yes	1-3 times a month	once a week
2021-02-19 22:31:08	Yes	more than 27	Married	Other	176	79	No	Male	Almost	no never	sometimes	Yes, definitely	Less than 15 hours (about 3 hours per day)	Less than 15 hours (about 3 hours per day)	21-25 hours (approximately 5 hours per day)	Yes, definitely	15-20 hours (approximately 4 hours per day)	Less than 15 hours (about 3 hours per day)	15-20 hours (approximately 4 hours per day)	2-3 months	7 hours	Yes	Almost standing and walking	By car or taxi	2	1	5	1	half an hour, 2 to 4 hours	half an hour	From an hour to less than two hours	half an hour	2	2	2	1	3	1 to 2, ٣	1	half an hour	From an hour to less than two hours	half an hour	From an hour to less than two hours	half an hour	half an hour	half an hour	Yes	4-5 times a week	1-3 times a month
2021-02-19 22:48:28	Yes	more than 27	Married	Health sciences (medicine, pharmacy, applied medical sciences, dentistry)	180	82	No	Male	sometimes	no never	Yes, definitely	sometimes	Less than 15 hours (about 3 hours per day)	15-20 hours (approximately 4 hours per day)	Less than 15 hours (about 3 hours per day)	sometimes	Less than 15 hours (about 3 hours per day)	more than 30 hours (more than 6 hours per day)	Less than 15 hours (about 3 hours per day)	less than a month	Less than 5 hours	Yes	A combination of sitting and standing up	By car or taxi	1	4	4	4	From an hour to less than two hours	From an hour to less than two hours	half an hour	half an hour	4	4	1	1	1	2	2	4 hours to 8 hours	4 hours to 8 hours	half an hour	half an hour	half an hour	half an hour	half an hour	No	1-3 times a month	1-3 times a month
2021-02-19 22:59:03	Yes	more than 27	Married	Other	170	63	No	Male	no never	rarely	rarely	sometimes	٢٦ -٣٠ ساعات ( تقريباً ٦ساعات يومياً)	26-30 hours (approximately 6 hours per day)	15-20 hours (approximately 4 hours per day)	Almost	Less than 15 hours (about 3 hours per day)	Less than 15 hours (about 3 hours per day)	Less than 15 hours (about 3 hours per day)	less than a month	Less than 5 hours	Yes	Almost sitting	by walking	2	3	1	3	From an hour to less than two hours	From an hour to less than two hours	From an hour to less than two hours	From an hour to less than two hours	2	2	3	3	3	3	3	From an hour to less than two hours	2 to 4 hours	2 to 4 hours	2 to 4 hours	2 to 4 hours	2 to 4 hours	2 to 4 hours	Yes	once a week	once a week
2021-02-19 23:25:50	Yes	more than 27	Married	Other	164	57	No	Female	sometimes	Yes, definitely	Yes, definitely	sometimes	15-20 hours (approximately 4 hours per day)	Less than 15 hours (about 3 hours per day)	15-20 hours (approximately 4 hours per day)	Yes, definitely	26-30 hours (approximately 6 hours per day)	21-25 hours (approximately 5 hours per day)	15-20 hours (approximately 4 hours per day)	less than a month	6 hours	I don't know	Almost sitting	By car or taxi	1	2	1 to 2	1	half an hour	half an hour	half an hour	From an hour to less than two hours	1	1	1	1	1	1	1	half an hour	half an hour	half an hour	From an hour to less than two hours	From an hour to less than two hours	From an hour to less than two hours	half an hour	No	1-3 times a month	1-3 times a month
2021-02-20 00:17:09	Yes	more than 27	Married	Humanities (media, languages, law....etc)	150	50	No	Female	sometimes	no never	Yes, definitely	Yes, definitely	Less than 15 hours (about 3 hours per day)	Less than 15 hours (about 3 hours per day)	26-30 hours (approximately 6 hours per day)	Yes, definitely	15-20 hours (approximately 4 hours per day)	Less than 15 hours (about 3 hours per day)	Less than 15 hours (about 3 hours per day)	less than a month	7 hours	No	Almost standing and walking	By car or taxi	7	7	7	7	4 hours to 8 hours	4 hours to 8 hours	4 hours to 8 hours	4 hours to 8 hours	1	6	2	1	1	I don't know	1	4 hours to 8 hours	more than 8 hours	half an hour	half an hour	half an hour	I don't know	2 to 4 hours	Yes	1-3 times a month	6-7 times a week
2021-02-20 00:40:39	Yes	18-24	Single	Health sciences (medicine, pharmacy, applied medical sciences, dentistry)	166	51	Yes	Female	Yes, definitely	Yes, definitely	Almost	Yes, definitely	Less than 15 hours (about 3 hours per day)	15-20 hours (approximately 4 hours per day)	more than 30 hours (more than 6 hours per day)	no never	26-30 hours (approximately 6 hours per day)	Less than 15 hours (about 3 hours per day)	15-20 hours (approximately 4 hours per day)	2-3 months	Less than 5 hours	Yes	Almost sitting	By car or taxi	2	1	I don't want to answer	I don't want to answer	half an hour	half an hour	I don't want to answer	I don't want to answer	7	6	5	7	2	1	1	4 hours to 8 hours	2 to 4 hours	From an hour to less than two hours	2 to 4 hours	From an hour to less than two hours	half an hour	half an hour	Yes	2-3 times a week	once a week
2021-02-20 01:23:34	Yes	18-24	Single	Other	152	44	Yes	Female	sometimes	no never	Yes, definitely	sometimes	Less than 15 hours (about 3 hours per day)	Less than 15 hours (about 3 hours per day)	Less than 15 hours (about 3 hours per day)	Almost	15-20 hours (approximately 4 hours per day)	Less than 15 hours (about 3 hours per day)	15-20 hours (approximately 4 hours per day)	less than a month	7 hours	No	A combination of sitting and standing up	By car or taxi	2	3	3	1	From an hour to less than two hours	half an hour	From an hour to less than two hours	half an hour	2	3	4	2	2	4	1	From an hour to less than two hours	From an hour to less than two hours	From an hour to less than two hours	half an hour	From an hour to less than two hours	From an hour to less than two hours	half an hour	Yes	1-3 times a month	1-3 times a month
2021-02-20 05:11:00	Yes	18-24	Single	Health sciences (medicine, pharmacy, applied medical sciences, dentistry)	150	50	Yes	Female	Yes, definitely	sometimes	Yes, definitely	Yes, definitely	15-20 hours (approximately 4 hours per day)	Less than 15 hours (about 3 hours per day)	15-20 hours (approximately 4 hours per day)	Almost	15-20 hours (approximately 4 hours per day)	15-20 hours (approximately 4 hours per day)	15-20 hours (approximately 4 hours per day)	2-3 months	7 hours	Yes	Almost sitting	By car or taxi	1	1	4	1	half an hour	half an hour	half an hour	half an hour	1	1	1	2	2	1	1	I don't know	half an hour	half an hour	half an hour	half an hour	half an hour	half an hour	No	I don't know	I don't know
2021-02-20 05:12:45	Yes	more than 27	Married	Other	180	85	No	Male	no never	Yes, definitely	Yes, definitely	Yes, definitely	Less than 15 hours (about 3 hours per day)	15-20 hours (approximately 4 hours per day)	more than 30 hours (more than 6 hours per day)	Almost	Less than 15 hours (about 3 hours per day)	more than 30 hours (more than 6 hours per day)	21-25 hours (approximately 5 hours per day)	less than a month	7 hours	Yes	Almost standing and walking	By car or taxi	5	I don't know	5	I don't know	2 to 4 hours	From an hour to less than two hours	half an hour	I don't know	5	5	7	3	7	7	5	2 to 4 hours	From an hour to less than two hours	2 to 4 hours	From an hour to less than two hours	half an hour	From an hour to less than two hours	From an hour to less than two hours	Yes	2-3 times a week	6-7 times a week
2021-02-20 11:58:43	Yes	more than 27	Married	Other	172	83	No	Male	Yes, definitely	Yes, definitely	Almost	no never	Less than 15 hours (about 3 hours per day)	26-30 hours (approximately 6 hours per day)	Less than 15 hours (about 3 hours per day)	Almost	Less than 15 hours (about 3 hours per day)	Less than 15 hours (about 3 hours per day)	26-30 hours (approximately 6 hours per day)	2-3 months	Less than 5 hours	Yes	Almost sitting	By car or taxi	4	1	4	1	2 to 4 hours	half an hour	From an hour to less than two hours	half an hour	1	2	1	1	1	2	2	half an hour	From an hour to less than two hours	half an hour	half an hour	half an hour	half an hour	half an hour	Yes	4-5 times a week	1-3 times a month
2021-02-20 12:25:07	Yes	18-24	Single	Other	180	80	Yes	Male	no never	no never	sometimes	Almost	Less than 15 hours (about 3 hours per day)	21-25 hours (approximately 5 hours per day)	21-25 hours (approximately 5 hours per day)	Yes, definitely	26-30 hours (approximately 6 hours per day)	Less than 15 hours (about 3 hours per day)	15-20 hours (approximately 4 hours per day)	2-3 months	10 hours or more	I don't know	Almost standing and walking	By car or taxi	1	2	1	2	From an hour to less than two hours	From an hour to less than two hours	half an hour	From an hour to less than two hours	2	3	2	1	1	3	1	half an hour	half an hour	half an hour	From an hour to less than two hours	From an hour to less than two hours	From an hour to less than two hours	From an hour to less than two hours	Yes	once a week	once a week
2021-02-20 13:46:56	Yes	25-27	Single	Other	160	78	Yes	Female	Almost	Almost	Almost	sometimes	Less than 15 hours (about 3 hours per day)	15-20 hours (approximately 4 hours per day)	more than 30 hours (more than 6 hours per day)	Almost	more than 30 hours (more than 6 hours per day)	more than 30 hours (more than 6 hours per day)	21-25 hours (approximately 5 hours per day)	7-12 months	Less than 5 hours	Yes	Almost sitting	By car or taxi	1	1	5	1 to 3	half an hour	half an hour	From an hour to less than two hours	half an hour	3	5	1	5	1	3	1	From an hour to less than two hours	4 hours to 8 hours	half an hour	From an hour to less than two hours	half an hour	From an hour to less than two hours	half an hour	No	1-3 times a month	1-3 times a month
2021-02-20 14:36:09	Yes	more than 27	Single	Other	152	82	No	Female	Almost	no never	Almost	rarely	Less than 15 hours (about 3 hours per day)	Less than 15 hours (about 3 hours per day)	Less than 15 hours (about 3 hours per day)	rarely	Less than 15 hours (about 3 hours per day)	Less than 15 hours (about 3 hours per day)	15-20 hours (approximately 4 hours per day)	less than a month	8 hours	Yes	Almost sitting	By car or taxi	3	I don't know	3	1	2 to 4 hours	I don't know	2 to 4 hours	I don't know	1	1	3	5	2	1	1	From an hour to less than two hours	half an hour	half an hour	4 hours to 8 hours	From an hour to less than two hours	half an hour	half an hour	Yes	2-3 times a week	I don't know
2021-02-20 17:26:19	Yes	more than 27	Married	Other	172	81	No	Male	Yes, definitely	sometimes	no never	Yes, definitely	Less than 15 hours (about 3 hours per day)	Less than 15 hours (about 3 hours per day)	Less than 15 hours (about 3 hours per day)	no never	Less than 15 hours (about 3 hours per day)	Less than 15 hours (about 3 hours per day)	Less than 15 hours (about 3 hours per day)	less than a month	Less than 5 hours	Yes	A combination of sitting and standing up	By car or taxi	1	1	1	1	half an hour	half an hour	half an hour	half an hour	1	1	1	1	2	2	2	half an hour	half an hour	half an hour	half an hour	From an hour to less than two hours	From an hour to less than two hours	From an hour to less than two hours	Yes	1-3 times a month	1-3 times a month
2021-02-20 19:07:20	Yes	18-24	Single	Health sciences (medicine, pharmacy, applied medical sciences, dentistry)	150	50	Yes	Female	Yes, definitely	sometimes	Yes, definitely	Yes, definitely	15-20 hours (approximately 4 hours per day)	Less than 15 hours (about 3 hours per day)	15-20 hours (approximately 4 hours per day)	Almost	15-20 hours (approximately 4 hours per day)	15-20 hours (approximately 4 hours per day)	15-20 hours (approximately 4 hours per day)	2-3 months	7 hours	Yes	Almost sitting	By car or taxi	1	1	4	1	half an hour	half an hour	half an hour	half an hour	1	1	1	2	2	1	1	I don't know	half an hour	half an hour	half an hour	half an hour	half an hour	half an hour	No	I don't know	I don't know
2021-02-21 00:46:40	Yes	18-24	Single	Other	159	45	Yes	Female	Yes, definitely	Yes, definitely	no never	Yes, definitely	Less than 15 hours (about 3 hours per day)	Less than 15 hours (about 3 hours per day)	more than 30 hours (more than 6 hours per day)	no never	26-30 hours (approximately 6 hours per day)	Less than 15 hours (about 3 hours per day)	Less than 15 hours (about 3 hours per day)	2-3 months	7 hours	Yes	Almost sitting	By car or taxi	I don't know	I don't know	I don't know	I don't know	2 to 4 hours	From an hour to less than two hours	From an hour to less than two hours	From an hour to less than two hours	7	2	I don't know	3	2	1	1	2 to 4 hours	half an hour	half an hour	From an hour to less than two hours	From an hour to less than two hours	half an hour	half an hour	No	I don't want to answer	I don't want to answer
2021-02-21 04:06:04	Yes	18-24	Single	Health sciences (medicine, pharmacy, applied medical sciences, dentistry)	147	46	Yes	Female	Yes, definitely	Almost	sometimes	sometimes	Less than 15 hours (about 3 hours per day)	Less than 15 hours (about 3 hours per day)	21-25 hours (approximately 5 hours per day)	no never	26-30 hours (approximately 6 hours per day)	15-20 hours (approximately 4 hours per day)	Less than 15 hours (about 3 hours per day)	less than a month	Less than 5 hours	Yes	Almost sitting	By car or taxi	I don't know	I don't know	3	I don't know	From an hour to less than two hours	I don't know	half an hour, I don't know	I don't know	3	7	I don't want to answer	3	I don't know	1	I don't know	half an hour	4 hours to 8 hours	I don't know	half an hour	I don't know	I don't know	I don't know	No	I don't want to answer	1-3 times a month
2021-02-21 11:14:57	Yes	more than 27	Married	Health sciences (medicine, pharmacy, applied medical sciences, dentistry)	180	82	No	Male	sometimes	no never	Yes, definitely	sometimes	Less than 15 hours (about 3 hours per day)	15-20 hours (approximately 4 hours per day)	Less than 15 hours (about 3 hours per day)	sometimes	Less than 15 hours (about 3 hours per day)	more than 30 hours (more than 6 hours per day)	Less than 15 hours (about 3 hours per day)	less than a month	Less than 5 hours	Yes	A combination of sitting and standing up	By car or taxi	1	4	4	4	From an hour to less than two hours	From an hour to less than two hours	half an hour	half an hour	4	4	1	1	1	2	2	4 hours to 8 hours	4 hours to 8 hours	half an hour	half an hour	half an hour	half an hour	half an hour	No	1-3 times a month	1-3 times a month
2021-02-21 12:53:55	Yes	more than 27	Married	Other	164	57	No	Female	sometimes	Yes, definitely	Yes, definitely	sometimes	15-20 hours (approximately 4 hours per day)	Less than 15 hours (about 3 hours per day)	15-20 hours (approximately 4 hours per day)	Yes, definitely	26-30 hours (approximately 6 hours per day)	21-25 hours (approximately 5 hours per day)	15-20 hours (approximately 4 hours per day)	less than a month	6 hours	I don't know	Almost sitting	By car or taxi	1	2	1 to 2	1	half an hour	half an hour	half an hour	From an hour to less than two hours	1	1	1	1	1	1	1	half an hour	half an hour	half an hour	From an hour to less than two hours	From an hour to less than two hours	From an hour to less than two hours	half an hour	No	1-3 times a month	1-3 times a month
2021-02-21 13:31:57	Yes	18-24	Single	Natural Sciences (Physics, Chemistry, Biochemistry ... etc.)	155	47	Yes	Female	Almost	Yes, definitely	Yes, definitely	sometimes	Less than 15 hours (about 3 hours per day)	15-20 hours (approximately 4 hours per day)	26-30 hours (approximately 6 hours per day)	Almost	26-30 hours (approximately 6 hours per day)	Less than 15 hours (about 3 hours per day)	21-25 hours (approximately 5 hours per day)	less than a month	6 hours	Yes	A combination of sitting and standing up	By car or taxi	3	2	4	1	From an hour to less than two hours	half an hour	half an hour	half an hour	1	5	1	7	2	3	1	From an hour to less than two hours	half an hour, 2 to 4 hours	half an hour	more than 8 hours	From an hour to less than two hours	half an hour	half an hour	No	once a week	once a week
2021-02-21 13:33:44	Yes	18-24	Single	Natural Sciences (Physics, Chemistry, Biochemistry ... etc.)	154	56	Yes	Female	Almost	no never	Almost	rarely	Less than 15 hours (about 3 hours per day)	15-20 hours (approximately 4 hours per day)	more than 30 hours (more than 6 hours per day)	sometimes	more than 30 hours (more than 6 hours per day)	Less than 15 hours (about 3 hours per day)	21-25 hours (approximately 5 hours per day)	2-3 months	Less than 5 hours	Yes	A combination of sitting and standing up	I don't want to answer	2	1	1	1	From an hour to less than two hours	half an hour	From an hour to less than two hours	half an hour	2	3	3	3	3	2	2	half an hour	half an hour	half an hour	half an hour	From an hour to less than two hours	From an hour to less than two hours	From an hour to less than two hours	Yes	once a week	4-5 times a week
2021-02-21 13:37:59	Yes	18-24	Single	Natural Sciences (Physics, Chemistry, Biochemistry ... etc.)	159	57	Yes	Female	Yes, definitely	Almost	sometimes	rarely	٢٦ -٣٠ ساعات ( تقريباً ٦ساعات يومياً)	15-20 hours (approximately 4 hours per day)	26-30 hours (approximately 6 hours per day)	rarely	15-20 hours (approximately 4 hours per day)	21-25 hours (approximately 5 hours per day)	15-20 hours (approximately 4 hours per day)	4-6 months	6 hours	No	A combination of sitting and standing up	Bike or bus rides	2	4	2	3	From an hour to less than two hours	2 to 4 hours	2 to 4 hours	2 to 4 hours	1	2	4	3	1	2	3	From an hour to less than two hours	From an hour to less than two hours	From an hour to less than two hours	2 to 4 hours	From an hour to less than two hours	4 hours to 8 hours	2 to 4 hours	Yes	2-3 times a week	once a week
2021-02-21 14:04:51	Yes	18-24	Single	Humanities (media, languages, law....etc)	155	45	Yes	Female	Almost	Almost	Yes, definitely	Almost	Less than 15 hours (about 3 hours per day)	21-25 hours (approximately 5 hours per day)	26-30 hours (approximately 6 hours per day)	Almost	21-25 hours (approximately 5 hours per day)	more than 30 hours (more than 6 hours per day)	21-25 hours (approximately 5 hours per day)	less than a month	9 hours	No	A combination of sitting and standing up	By car or taxi	1	3	2	1	From an hour to less than two hours, 2 to 4 hours	half an hour, From an hour to less than two hours	half an hour	half an hour	1	1	2	1 to 2	1	2	1	From an hour to less than two hours	From an hour to less than two hours	half an hour	half an hour	half an hour	half an hour	half an hour	No	1-3 times a month	once a week
2021-02-21 17:45:27	Yes	18-24	Single	Other	163	46	Yes	Female	Almost	Almost	sometimes	Yes, definitely	Less than 15 hours (about 3 hours per day)	15-20 hours (approximately 4 hours per day)	21-25 hours (approximately 5 hours per day)	rarely	21-25 hours (approximately 5 hours per day)	Less than 15 hours (about 3 hours per day)	Less than 15 hours (about 3 hours per day)	less than a month	6 hours	No	A combination of sitting and standing up	By car or taxi	1	1	6	1	From an hour to less than two hours	half an hour	half an hour	half an hour	1	1	1	3	3	3	1	half an hour	2 to 4 hours	half an hour	half an hour	half an hour	half an hour	half an hour	No	1-3 times a month	once a week
2021-02-21 18:18:01	Yes	more than 27	Married	Other	155	52	No	Female	no never	rarely	rarely	sometimes	Less than 15 hours (about 3 hours per day)	Less than 15 hours (about 3 hours per day)	15-20 hours (approximately 4 hours per day)	Almost	Less than 15 hours (about 3 hours per day)	Less than 15 hours (about 3 hours per day)	Less than 15 hours (about 3 hours per day)	less than a month	Less than 5 hours	No	A combination of sitting and standing up	By car or taxi	2	2	2	2	half an hour	half an hour	half an hour	half an hour	2	1	3	2	3	1	1	2 to 4 hours	From an hour to less than two hours	4 hours to 8 hours	From an hour to less than two hours	half an hour	half an hour	half an hour	No	I don't want to answer	6-7 times a week
2021-02-21 20:01:56	Yes	18-24	Single	Humanities (media, languages, law....etc)	155	47	Yes	Female	Almost	sometimes	sometimes	rarely	Less than 15 hours (about 3 hours per day)	15-20 hours (approximately 4 hours per day)	more than 30 hours (more than 6 hours per day)	Almost	26-30 hours (approximately 6 hours per day)	Less than 15 hours (about 3 hours per day)	Less than 15 hours (about 3 hours per day)	2-3 months	6 hours	No	A combination of sitting and standing up	By car or taxi	1	1	4	1	half an hour	From an hour to less than two hours	From an hour to less than two hours	From an hour to less than two hours	1	1	1	3	2	2	1	half an hour	2 to 4 hours	From an hour to less than two hours	From an hour to less than two hours	From an hour to less than two hours	half an hour	From an hour to less than two hours	No	once a week	once a week
2021-02-21 20:35:12	Yes	more than 27	Married	Other	160	79	No	Male	sometimes	no never	sometimes	rarely	Less than 15 hours (about 3 hours per day)	Less than 15 hours (about 3 hours per day)	21-25 hours (approximately 5 hours per day)	sometimes	15-20 hours (approximately 4 hours per day)	Less than 15 hours (about 3 hours per day)	Less than 15 hours (about 3 hours per day)	less than a month	6 hours	Yes	Almost sitting	By car or taxi	I don't want to answer	I don't want to answer	5	I don't want to answer	I don't want to answer	I don't want to answer	2 to 4 hours	I don't want to answer	I don't want to answer	7	I don't want to answer	I don't want to answer	7	I don't want to answer	I don't want to answer	I don't want to answer	4 hours to 8 hours	I don't want to answer	I don't want to answer	I don't want to answer	I don't want to answer	I don't want to answer	No	I don't want to answer	I don't want to answer
2021-02-22 00:01:03	Yes	18-24	Single	Natural Sciences (Physics, Chemistry, Biochemistry ... etc.)	159	57	Yes	Female	Yes, definitely	Almost	sometimes	rarely	٢٦ -٣٠ ساعات ( تقريباً ٦ساعات يومياً)	15-20 hours (approximately 4 hours per day)	26-30 hours (approximately 6 hours per day)	rarely	15-20 hours (approximately 4 hours per day)	21-25 hours (approximately 5 hours per day)	15-20 hours (approximately 4 hours per day)	4-6 months	6 hours	No	A combination of sitting and standing up	Bike or bus rides	2	4	2	3	From an hour to less than two hours	2 to 4 hours	2 to 4 hours	2 to 4 hours	1	2	4	3	1	2	3	From an hour to less than two hours	From an hour to less than two hours	From an hour to less than two hours	2 to 4 hours	From an hour to less than two hours	4 hours to 8 hours	2 to 4 hours	Yes	2-3 times a week	once a week
2021-02-22 00:08:20	Yes	18-24	Single	Humanities (media, languages, law....etc)	164	60	No	Female	sometimes	sometimes	sometimes	Almost	Less than 15 hours (about 3 hours per day)	15-20 hours (approximately 4 hours per day)	more than 30 hours (more than 6 hours per day)	no never	Less than 15 hours (about 3 hours per day)	Less than 15 hours (about 3 hours per day)	15-20 hours (approximately 4 hours per day)	less than a month	7 hours	No	A combination of sitting and standing up	By car or taxi	1	1	2	1	4 hours to 8 hours	2 to 4 hours	From an hour to less than two hours	half an hour	4	4	2	4	2	2	1	From an hour to less than two hours	4 hours to 8 hours	half an hour	From an hour to less than two hours	From an hour to less than two hours	2 to 4 hours	half an hour	No	once a week	once a week
2021-02-22 03:54:31	Yes	18-24	Single	Humanities (media, languages, law....etc)	160	43	Yes	Female	no never	Yes, definitely	Yes, definitely	rarely	Less than 15 hours (about 3 hours per day)	Less than 15 hours (about 3 hours per day)	21-25 hours (approximately 5 hours per day)	sometimes	21-25 hours (approximately 5 hours per day)	Less than 15 hours (about 3 hours per day)	Less than 15 hours (about 3 hours per day)	less than a month	10 hours or more	No	Some physical activity	By car or taxi	1	I don't want to answer	3	1	From an hour to less than two hours	half an hour	half an hour	half an hour	3	1	1	1	1	1	1	half an hour	half an hour	half an hour	half an hour	half an hour	half an hour	half an hour	Yes	1-3 times a month	1-3 times a month
2021-02-22 07:50:08	Yes	18-24	Single	Humanities (media, languages, law....etc)	158	56	Yes	Female	Almost	Yes, definitely	Yes, definitely	Almost	Less than 15 hours (about 3 hours per day)	Less than 15 hours (about 3 hours per day)	15-20 hours (approximately 4 hours per day)	sometimes	21-25 hours (approximately 5 hours per day)	Less than 15 hours (about 3 hours per day)	Less than 15 hours (about 3 hours per day)	less than a month	Less than 5 hours	Yes	A combination of sitting and standing up	By car or taxi	1	1	1	1	half an hour	half an hour	half an hour	half an hour	1	5 to 7	1	1	1	2	1	half an hour	more than 8 hours	half an hour	half an hour	half an hour	4 hours to 8 hours	half an hour	No	1-3 times a month	6-7 times a week
2021-02-22 09:50:08	Yes	18-24	Single	Humanities (media, languages, law....etc)	160	43	Yes	Female	no never	Yes, definitely	Yes, definitely	rarely	Less than 15 hours (about 3 hours per day)	Less than 15 hours (about 3 hours per day)	21-25 hours (approximately 5 hours per day)	sometimes	21-25 hours (approximately 5 hours per day)	Less than 15 hours (about 3 hours per day)	Less than 15 hours (about 3 hours per day)	less than a month	10 hours or more	No	Some physical activity	By car or taxi	1	I don't want to answer	3	1	From an hour to less than two hours	half an hour	half an hour	half an hour	3	1	1	1	1	1	1	half an hour	half an hour	half an hour	half an hour	half an hour	half an hour	half an hour	Yes	1-3 times a month	1-3 times a month
2021-02-22 10:06:23	Yes	18-24	Single	Humanities (media, languages, law....etc)	160	68	Yes	Female	Yes, definitely	Yes, definitely	Yes, definitely	Yes, definitely	Less than 15 hours (about 3 hours per day)	Less than 15 hours (about 3 hours per day)	26-30 hours (approximately 6 hours per day)	sometimes	more than 30 hours (more than 6 hours per day)	Less than 15 hours (about 3 hours per day)	Less than 15 hours (about 3 hours per day)	less than a month	6 hours	Yes	Almost sitting	By car or taxi	I don't want to answer	I don't want to answer	1	I don't want to answer	I don't want to answer	I don't want to answer	half an hour	I don't want to answer	I don't want to answer	I don't want to answer	1	1	I don't want to answer	I don't want to answer	I don't want to answer	I don't want to answer	half an hour	half an hour	2 to 4 hours	I don't want to answer	I don't want to answer	I don't want to answer	Yes	4-5 times a week	I don't want to answer
2021-02-22 14:57:40	Yes	18-24	Single	Humanities (media, languages, law....etc)	164	60	No	Female	sometimes	sometimes	sometimes	Almost	Less than 15 hours (about 3 hours per day)	15-20 hours (approximately 4 hours per day)	more than 30 hours (more than 6 hours per day)	no never	Less than 15 hours (about 3 hours per day)	Less than 15 hours (about 3 hours per day)	15-20 hours (approximately 4 hours per day)	less than a month	7 hours	No	A combination of sitting and standing up	By car or taxi	1	1	2	1	4 hours to 8 hours	2 to 4 hours	From an hour to less than two hours	half an hour	4	4	2	4	2	2	1	From an hour to less than two hours	4 hours to 8 hours	half an hour	From an hour to less than two hours	From an hour to less than two hours	2 to 4 hours	half an hour	No	once a week	once a week
2021-02-22 19:51:42	Yes	more than 27	Married	Other	160	172	No	Female	Almost	no never	Yes, definitely	Yes, definitely	Less than 15 hours (about 3 hours per day)	Less than 15 hours (about 3 hours per day)	more than 30 hours (more than 6 hours per day)	sometimes	more than 30 hours (more than 6 hours per day)	more than 30 hours (more than 6 hours per day)	26-30 hours (approximately 6 hours per day)	less than a month	8 hours	No	A combination of sitting and standing up	By car or taxi	1	2	2 to 5	2	half an hour	half an hour	half an hour	half an hour	5	3	2	5	2	2	1	half an hour	half an hour	From an hour to less than two hours	From an hour to less than two hours	From an hour to less than two hours	half an hour	half an hour	Yes	1-3 times a month	once a week
2021-02-22 21:10:47	Yes	18-24	Single	Other	159	54	Yes	Female	Almost	Almost	sometimes	rarely	Less than 15 hours (about 3 hours per day)	Less than 15 hours (about 3 hours per day)	21-25 hours (approximately 5 hours per day)	no never	15-20 hours (approximately 4 hours per day)	Less than 15 hours (about 3 hours per day)	Less than 15 hours (about 3 hours per day)	less than a month	8 hours	Yes	Almost sitting	By car or taxi	5	1	2	I don't know	From an hour to less than two hours	I don't know	2 to 4 hours	I don't know	4	1	1	1	3	3	1	2 to 4 hours	2 to 4 hours	2 to 4 hours	2 to 4 hours	4 hours to 8 hours	From an hour to less than two hours	half an hour	No	2-3 times a week	4-5 times a week
2021-02-22 21:54:48	Yes	18-24	Single	Humanities (media, languages, law....etc)	174	55	Yes	Male	Yes, definitely	Almost	sometimes	Yes, definitely	Less than 15 hours (about 3 hours per day)	15-20 hours (approximately 4 hours per day)	26-30 hours (approximately 6 hours per day)	Almost	26-30 hours (approximately 6 hours per day)	Less than 15 hours (about 3 hours per day)	21-25 hours (approximately 5 hours per day)	2-3 months	10 hours or more	No	Almost sitting	By car or taxi	1	1	4	1	From an hour to less than two hours	half an hour	half an hour	half an hour	3	6	4	2	2	1	1	half an hour	2 to 4 hours	From an hour to less than two hours	From an hour to less than two hours	From an hour to less than two hours	From an hour to less than two hours	more than 8 hours	I don't know	once a week	2-3 times a week
2021-02-22 22:17:38	Yes	18-24	Single	Health sciences (medicine, pharmacy, applied medical sciences, dentistry)	160	55	Yes	Female	no never	Almost	Almost	Almost	21-25 hours (approximately 5 hours per day)	21-25 hours (approximately 5 hours per day)	Less than 15 hours (about 3 hours per day)	Yes, definitely	15-20 hours (approximately 4 hours per day)	15-20 hours (approximately 4 hours per day)	15-20 hours (approximately 4 hours per day)	less than a month	6 hours	Yes	Almost sitting	by walking	3	1	2	3	half an hour	2 to 4 hours	From an hour to less than two hours	half an hour	2	2	1	3	1	1	1	half an hour	From an hour to less than two hours	2 to 4 hours	4 hours to 8 hours	half an hour	From an hour to less than two hours	2 to 4 hours	Yes	1-3 times a month	once a week
2021-02-22 23:07:32	Yes	18-24	Married	Other	170	68	Yes	Male	Yes, definitely	Yes, definitely	sometimes	Yes, definitely	Less than 15 hours (about 3 hours per day)	Less than 15 hours (about 3 hours per day)	21-25 hours (approximately 5 hours per day)	no never	15-20 hours (approximately 4 hours per day)	Less than 15 hours (about 3 hours per day)	Less than 15 hours (about 3 hours per day)	less than a month	6 hours	No	A combination of sitting and standing up	By car or taxi	I don't want to answer	I don't want to answer	I don't want to answer	I don't want to answer	I don't want to answer	I don't want to answer	half an hour	I don't want to answer	2 to 4	7	I don't want to answer	I don't want to answer	4	٣, ٤	I don't want to answer	From an hour to less than two hours	From an hour to less than two hours	I don't want to answer	I don't want to answer	From an hour to less than two hours	From an hour to less than two hours	I don't want to answer	No	1-3 times a month	1-3 times a month
2021-02-22 23:12:22	Yes	18-24	Single	Humanities (media, languages, law....etc)	144	143	Yes	Female	sometimes	rarely	Almost	rarely	Less than 15 hours (about 3 hours per day)	21-25 hours (approximately 5 hours per day)	more than 30 hours (more than 6 hours per day)	rarely	26-30 hours (approximately 6 hours per day)	Less than 15 hours (about 3 hours per day)	more than 30 hours (more than 6 hours per day)	less than a month	Less than 5 hours	I don't want to answer	A combination of sitting and standing up	Bike or bus rides	I don't want to answer	5	I don't want to answer	I don't want to answer	I don't want to answer	2 to 4 hours	I don't want to answer	I don't want to answer	1	4	2	7	1	2	I don't know	I don't want to answer	2 to 4 hours	half an hour	4 hours to 8 hours	From an hour to less than two hours	half an hour	I don't want to answer	No	I don't want to answer	I don't want to answer
2021-02-22 23:14:33	Yes	18-24	Single	Health sciences (medicine, pharmacy, applied medical sciences, dentistry)	168	52	Yes	Female	Yes, definitely	Almost	rarely	Yes, definitely	Less than 15 hours (about 3 hours per day)	Less than 15 hours (about 3 hours per day)	more than 30 hours (more than 6 hours per day)	no never	21-25 hours (approximately 5 hours per day)	Less than 15 hours (about 3 hours per day)	26-30 hours (approximately 6 hours per day)	2-3 months	Less than 5 hours	No	Almost sitting	By car or taxi	I don't want to answer	I don't want to answer	1	I don't want to answer	I don't want to answer	I don't want to answer	From an hour to less than two hours	I don't want to answer	I don't know	2	I don't know	I don't know	I don't know	I don't know	I don't know	I don't know	2 to 4 hours	I don't know	half an hour, I don't know	From an hour to less than two hours	I don't know	I don't know	No	I don't know	once a week
2021-02-22 23:16:51	Yes	under 18	Single	Other	159	57	Yes	Female	Yes, definitely	Yes, definitely	rarely	Yes, definitely	Less than 15 hours (about 3 hours per day)	Less than 15 hours (about 3 hours per day)	more than 30 hours (more than 6 hours per day)	no never	26-30 hours (approximately 6 hours per day)	Less than 15 hours (about 3 hours per day)	Less than 15 hours (about 3 hours per day)	2-3 months	6 hours	Yes	A combination of sitting and standing up	Bike or bus rides	1	I don't want to answer	1 to 3	I don't want to answer	half an hour	2 to 4 hours	half an hour	I don't know	1	7	2	1	4	7	I don't know	half an hour	more than 8 hours	half an hour	half an hour	4 hours to 8 hours	half an hour	I don't know	No	I don't want to answer	I don't want to answer
2021-02-22 23:23:03	Yes	18-24	Single	Natural Sciences (Physics, Chemistry, Biochemistry ... etc.)	160	67	Yes	Female	rarely	no never	Yes, definitely	sometimes	21-25 hours (approximately 5 hours per day)	21-25 hours (approximately 5 hours per day)	15-20 hours (approximately 4 hours per day)	Almost	21-25 hours (approximately 5 hours per day)	21-25 hours (approximately 5 hours per day)	Less than 15 hours (about 3 hours per day)	4-6 months	10 hours or more	Yes	Some physical activity	By car or taxi	5	4	3	I don't know	From an hour to less than two hours	I don't know	From an hour to less than two hours	I don't know	I don't know	5	5	7	4	7	1	From an hour to less than two hours	2 to 4 hours	From an hour to less than two hours	From an hour to less than two hours	From an hour to less than two hours	more than 8 hours	half an hour	Yes	2-3 times a week	2-3 times a week
2021-02-22 23:36:15	Yes	18-24	Single	Other	150	40	No	Female	rarely	Almost	sometimes	rarely	15-20 hours (approximately 4 hours per day)	Less than 15 hours (about 3 hours per day)	more than 30 hours (more than 6 hours per day)	sometimes	more than 30 hours (more than 6 hours per day)	more than 30 hours (more than 6 hours per day)	21-25 hours (approximately 5 hours per day)	less than a month	6 hours	Yes	Almost sitting	By car or taxi	I don't want to answer	I don't want to answer	5	I don't want to answer	I don't want to answer	I don't want to answer	half an hour, From an hour to less than two hours	I don't want to answer	2 to 3	5	2 to 3	3, 4	1	1 to 2	I don't want to answer	2 to 4 hours	4 hours to 8 hours	From an hour to less than two hours, 2 to 4 hours	From an hour to less than two hours	From an hour to less than two hours, 2 to 4 hours	half an hour, From an hour to less than two hours	I don't want to answer	No	I don't want to answer	1-3 times a month
2021-02-22 23:54:01	Yes	18-24	Single	Natural Sciences (Physics, Chemistry, Biochemistry ... etc.)	165	52	Yes	Male	no never	Yes, definitely	sometimes	sometimes	Less than 15 hours (about 3 hours per day)	Less than 15 hours (about 3 hours per day)	Less than 15 hours (about 3 hours per day)	sometimes	15-20 hours (approximately 4 hours per day)	15-20 hours (approximately 4 hours per day)	Less than 15 hours (about 3 hours per day)	less than a month	10 hours or more	Yes	A combination of sitting and standing up	By car or taxi	1	I don't know	5 to 6	4	From an hour to less than two hours	half an hour	half an hour	half an hour	7	7	I don't know	2	3	1	I don't know	4 hours to 8 hours	I don't know	I don't know	2 to 4 hours	half an hour	half an hour	I don't know	I don't know	2-3 times a week	2-3 times a week
2021-02-23 00:30:10	Yes	under 18	Single	Other	168	44	Yes	Female	sometimes	Almost	Yes, definitely	sometimes	Less than 15 hours (about 3 hours per day)	Less than 15 hours (about 3 hours per day)	Less than 15 hours (about 3 hours per day)	Yes, definitely	Less than 15 hours (about 3 hours per day)	26-30 hours (approximately 6 hours per day)	21-25 hours (approximately 5 hours per day)	more than 12 months	10 hours or more	I don't know	A combination of sitting and standing up	I don't know	1	1	1	1	half an hour	half an hour	half an hour	half an hour	1	1	1	1	1	1	1	half an hour	half an hour	half an hour	half an hour	half an hour	half an hour	half an hour	I don't know	4-5 times a week	4-5 times a week
2021-02-23 02:22:25	Yes	18-24	Single	Health sciences (medicine, pharmacy, applied medical sciences, dentistry)	160	55	Yes	Female	no never	Almost	Almost	Almost	21-25 hours (approximately 5 hours per day)	21-25 hours (approximately 5 hours per day)	Less than 15 hours (about 3 hours per day)	Yes, definitely	15-20 hours (approximately 4 hours per day)	15-20 hours (approximately 4 hours per day)	15-20 hours (approximately 4 hours per day)	less than a month	6 hours	Yes	Almost sitting	by walking	3	1	2	3	half an hour	2 to 4 hours	From an hour to less than two hours	half an hour	2	2	1	3	1	1	1	half an hour	From an hour to less than two hours	2 to 4 hours	4 hours to 8 hours	half an hour	From an hour to less than two hours	2 to 4 hours	Yes	1-3 times a month	once a week
2021-02-23 02:48:18	Yes	18-24	Single	Other	156	50	Yes	Female	Yes, definitely	Almost	sometimes	Almost	Less than 15 hours (about 3 hours per day)	Less than 15 hours (about 3 hours per day)	more than 30 hours (more than 6 hours per day)	rarely	21-25 hours (approximately 5 hours per day)	21-25 hours (approximately 5 hours per day)	21-25 hours (approximately 5 hours per day)	less than a month	6 hours	Yes	Almost standing and walking	Bike or bus rides	I don't want to answer	I don't know	I don't want to answer	I don't want to answer	I don't want to answer	I don't want to answer	From an hour to less than two hours	I don't want to answer	I don't want to answer	2	4	7	2	1	I don't want to answer	From an hour to less than two hours	half an hour	4 hours to 8 hours	4 hours to 8 hours	half an hour	half an hour	half an hour	No	1-3 times a month	1-3 times a month
2021-02-23 06:20:18	Yes	18-24	Single	Health sciences (medicine, pharmacy, applied medical sciences, dentistry)	153	38.1	Yes	Female	Yes, definitely	sometimes	Yes, definitely	no never	Less than 15 hours (about 3 hours per day)	Less than 15 hours (about 3 hours per day)	26-30 hours (approximately 6 hours per day)	sometimes	26-30 hours (approximately 6 hours per day)	Less than 15 hours (about 3 hours per day)	Less than 15 hours (about 3 hours per day)	less than a month	Less than 5 hours	Yes	Some physical activity	Bike or bus rides	I don't know	2	I don't know	I don't know	From an hour to less than two hours	2 to 4 hours	half an hour	I don't know	2	5	I don't know	5	I don't know	1	1	half an hour	From an hour to less than two hours	I don't know	half an hour	half an hour	half an hour	half an hour	No	1-3 times a month	1-3 times a month
2021-02-23 09:21:15	Yes	18-24	Single	Other	163	39	Yes	Female	Yes, definitely	Almost	Yes, definitely	Yes, definitely	more than 30 hours (more than 6 hours per day)	Less than 15 hours (about 3 hours per day)	15-20 hours (approximately 4 hours per day)	Yes, definitely	15-20 hours (approximately 4 hours per day)	15-20 hours (approximately 4 hours per day)	Less than 15 hours (about 3 hours per day)	2-3 months	8 hours	Yes	Almost sitting	By car or taxi	7	7	7	I don't want to answer	half an hour	half an hour	half an hour	half an hour	1	1	1	1	1	1	1	half an hour	half an hour	half an hour	half an hour	half an hour	half an hour	half an hour	Yes	1-3 times a month	1-3 times a month
2021-02-23 09:31:33	Yes	under 18	Single	Other	148	48	Yes	Female	Almost	Yes, definitely	Yes, definitely	no never	Less than 15 hours (about 3 hours per day)	21-25 hours (approximately 5 hours per day)	21-25 hours (approximately 5 hours per day)	rarely	more than 30 hours (more than 6 hours per day)	Less than 15 hours (about 3 hours per day)	15-20 hours (approximately 4 hours per day)	2-3 months	10 hours or more	Yes	Almost sitting	By car or taxi	1	1	5	1	2 to 4 hours	From an hour to less than two hours	half an hour	more than 8 hours	5	5	2	2	1	5	1	more than 8 hours	From an hour to less than two hours, 2 to 4 hours	half an hour	half an hour	half an hour	half an hour	half an hour	No	1-3 times a month	4-5 times a week
2021-02-23 10:36:58	Yes	18-24	Single	Health sciences (medicine, pharmacy, applied medical sciences, dentistry)	153	60	Yes	Female	Yes, definitely	no never	rarely	Yes, definitely	Less than 15 hours (about 3 hours per day)	Less than 15 hours (about 3 hours per day)	Less than 15 hours (about 3 hours per day)	no never	Less than 15 hours (about 3 hours per day)	Less than 15 hours (about 3 hours per day)	Less than 15 hours (about 3 hours per day)	less than a month	10 hours or more	I don't know	Almost sitting	By car or taxi	I don't want to answer	I don't want to answer	1	I don't want to answer	I don't want to answer	I don't want to answer	half an hour	I don't want to answer	I don't know	I don't know	1	I don't know	1	1	I don't know	I don't know	I don't know	half an hour	I don't know	half an hour	half an hour	I don't know	No	I don't know	2-3 times a week
2021-02-23 11:28:44	Yes	18-24	Single	Humanities (media, languages, law....etc)	169	52	Yes	Male	rarely	no never	Yes, definitely	rarely	21-25 hours (approximately 5 hours per day)	Less than 15 hours (about 3 hours per day)	15-20 hours (approximately 4 hours per day)	Almost	more than 30 hours (more than 6 hours per day)	more than 30 hours (more than 6 hours per day)	Less than 15 hours (about 3 hours per day)	less than a month	7 hours	Yes	Almost sitting	By car or taxi	4	1	6	1	From an hour to less than two hours	half an hour	half an hour	half an hour	1	1	5	2	3	7	1	half an hour	From an hour to less than two hours	more than 8 hours	I don't know	4 hours to 8 hours	I don't know	2 to 4 hours	No	1-3 times a month	6-7 times a week
2021-02-23 14:01:59	Yes	18-24	Single	Humanities (media, languages, law....etc)	155	54	Yes	Female	Almost	sometimes	Yes, definitely	sometimes	Less than 15 hours (about 3 hours per day)	15-20 hours (approximately 4 hours per day)	21-25 hours (approximately 5 hours per day)	rarely	26-30 hours (approximately 6 hours per day)	15-20 hours (approximately 4 hours per day)	15-20 hours (approximately 4 hours per day)	less than a month	6 hours	I don't want to answer	Almost sitting	By car or taxi	4	3	1	1	2 to 4 hours	From an hour to less than two hours	From an hour to less than two hours	half an hour	1	4	4	3	5	1	2	half an hour	4 hours to 8 hours	4 hours to 8 hours	2 to 4 hours	more than 8 hours	half an hour	From an hour to less than two hours	No	1-3 times a month	1-3 times a month
2021-02-23 14:53:12	Yes	18-24	Single	Health sciences (medicine, pharmacy, applied medical sciences, dentistry)	185	95	Yes	Male	no never	Yes, definitely	rarely	sometimes	Less than 15 hours (about 3 hours per day)	Less than 15 hours (about 3 hours per day)	more than 30 hours (more than 6 hours per day)	Yes, definitely	more than 30 hours (more than 6 hours per day)	Less than 15 hours (about 3 hours per day)	Less than 15 hours (about 3 hours per day)	less than a month	7 hours	No	Some physical activity	By car or taxi	I don't want to answer	I don't want to answer	1	I don't want to answer	2 to 4 hours	From an hour to less than two hours	half an hour	I don't want to answer	7	7	6	1	6	6	I don't know	From an hour to less than two hours	2 to 4 hours	From an hour to less than two hours	half an hour	From an hour to less than two hours	From an hour to less than two hours	half an hour	Yes	6-7 times a week	6-7 times a week
2021-02-23 17:42:56	Yes	18-24	Single	Health sciences (medicine, pharmacy, applied medical sciences, dentistry)	156	55	Yes	Female	Almost	Yes, definitely	rarely	Almost	Less than 15 hours (about 3 hours per day)	15-20 hours (approximately 4 hours per day)	21-25 hours (approximately 5 hours per day)	Almost	21-25 hours (approximately 5 hours per day)	Less than 15 hours (about 3 hours per day)	21-25 hours (approximately 5 hours per day)	less than a month	8 hours	Yes	A combination of sitting and standing up	By car or taxi	1	1	3	1	4 hours to 8 hours	2 to 4 hours	2 to 4 hours	2 to 4 hours	3	3	1	4	4	4	1	I don't know	I don't know	I don't know	I don't know	I don't know	I don't know	I don't know	I don't want to answer	I don't know	I don't know
2021-02-23 18:00:10	Yes	18-24	Single	Humanities (media, languages, law....etc)	160	50	Yes	Female	no never	Yes, definitely	Yes, definitely	rarely	Less than 15 hours (about 3 hours per day)	Less than 15 hours (about 3 hours per day)	15-20 hours (approximately 4 hours per day)	Yes, definitely	Less than 15 hours (about 3 hours per day)	15-20 hours (approximately 4 hours per day)	Less than 15 hours (about 3 hours per day)	less than a month	8 hours	Yes	Some physical activity	By car or taxi	1	1	7	1	half an hour	half an hour, From an hour to less than two hours	half an hour	half an hour	2 to 4	6	1	1	3	2	2	half an hour	half an hour, 2 to 4 hours	2 to 4 hours	4 hours to 8 hours	4 hours to 8 hours	half an hour	2 to 4 hours, 4 hours to 8 hours	Yes	once a week	1-3 times a month
2021-02-24 07:46:43	Yes	18-24	Single	Other	179	81	Yes	Male	Yes, definitely	Yes, definitely	Almost	Yes, definitely	Less than 15 hours (about 3 hours per day)	Less than 15 hours (about 3 hours per day)	Less than 15 hours (about 3 hours per day)	sometimes	15-20 hours (approximately 4 hours per day)	Less than 15 hours (about 3 hours per day)	Less than 15 hours (about 3 hours per day)	2-3 months	Less than 5 hours	Yes	Almost sitting	By car or taxi	3	I don't know	5	I don't know	I don't know	I don't know	2 to 4 hours	I don't know	7	7	7	5	1	3	I don't know	4 hours to 8 hours	4 hours to 8 hours	4 hours to 8 hours	I don't know	half an hour	2 to 4 hours	I don't know	Yes	4-5 times a week	4-5 times a week
2021-02-24 12:17:45	Yes	18-24	Single	Health sciences (medicine, pharmacy, applied medical sciences, dentistry)	160	48	Yes	Female	Yes, definitely	no never	no never	Yes, definitely	Less than 15 hours (about 3 hours per day)	15-20 hours (approximately 4 hours per day)	15-20 hours (approximately 4 hours per day)	no never	21-25 hours (approximately 5 hours per day)	Less than 15 hours (about 3 hours per day)	Less than 15 hours (about 3 hours per day)	4-6 months	Less than 5 hours	Yes	Almost sitting	By car or taxi	I don't want to answer	I don't want to answer	2	I don't want to answer	I don't want to answer	I don't want to answer	From an hour to less than two hours	I don't want to answer	7	I don't want to answer	I don't want to answer	3	1	I don't want to answer	I don't want to answer	From an hour to less than two hours	I don't want to answer	I don't want to answer	2 to 4 hours	From an hour to less than two hours	I don't want to answer	I don't want to answer	No	I don't want to answer	I don't want to answer
2021-02-24 17:28:29	Yes	18-24	Single	Humanities (media, languages, law....etc)	167	71	Yes	Male	Yes, definitely	Yes, definitely	Almost	Yes, definitely	Less than 15 hours (about 3 hours per day)	Less than 15 hours (about 3 hours per day)	15-20 hours (approximately 4 hours per day)	rarely	15-20 hours (approximately 4 hours per day)	Less than 15 hours (about 3 hours per day)	Less than 15 hours (about 3 hours per day)	less than a month	8 hours	I don't want to answer	Some physical activity	By car or taxi	I don't know	I don't know	7	I don't know	I don't know	I don't know	I don't know	I don't know	7	7	2	2	3	1	I don't know	I don't know	I don't know	I don't know	I don't know	I don't know	I don't know	I don't know	No	I don't know	I don't know
2021-02-24 17:33:23	Yes	18-24	Single	Humanities (media, languages, law....etc)	156	47	Yes	Female	sometimes	Yes, definitely	sometimes	Almost	Less than 15 hours (about 3 hours per day)	15-20 hours (approximately 4 hours per day)	more than 30 hours (more than 6 hours per day)	sometimes	26-30 hours (approximately 6 hours per day)	Less than 15 hours (about 3 hours per day)	21-25 hours (approximately 5 hours per day)	less than a month	8 hours	Yes	A combination of sitting and standing up	By car or taxi	7	I don't know	I don't know	I don't know	half an hour	half an hour	half an hour	half an hour	1	7	1	7	1	7	1	I don't know	more than 8 hours	half an hour	2 to 4 hours	I don't know	From an hour to less than two hours	I don't know	No	1-3 times a month	I don't know
2021-02-25 09:49:42	Yes	18-24	Single	Other	148	42	Yes	Female	rarely	Yes, definitely	Yes, definitely	rarely	Less than 15 hours (about 3 hours per day)	Less than 15 hours (about 3 hours per day)	15-20 hours (approximately 4 hours per day)	Almost	21-25 hours (approximately 5 hours per day)	Less than 15 hours (about 3 hours per day)	Less than 15 hours (about 3 hours per day)	less than a month	8 hours	Yes	Some physical activity	Bike or bus rides	1	1	4	1	From an hour to less than two hours	half an hour, From an hour to less than two hours	half an hour	half an hour	1	4	2	2	1	2	2	half an hour	From an hour to less than two hours	From an hour to less than two hours	half an hour	half an hour	half an hour	half an hour	Yes	2-3 times a week	once a week
2021-02-25 18:15:31	Yes	18-24	Single	Other	160	48	Yes	Female	sometimes	Almost	no never	no never	more than 30 hours (more than 6 hours per day)	Less than 15 hours (about 3 hours per day)	more than 30 hours (more than 6 hours per day)	no never	21-25 hours (approximately 5 hours per day)	Less than 15 hours (about 3 hours per day)	Less than 15 hours (about 3 hours per day)	less than a month	8 hours	Yes	Almost sitting	By car or taxi	I don't know	I don't know	7	I don't know	I don't know	I don't know	half an hour	I don't know	2	7	1	5	I don't know	7	I don't know	2 to 4 hours	4 hours to 8 hours	half an hour	From an hour to less than two hours	2 to 4 hours	From an hour to less than two hours	I don't know	No	I don't know	I don't know
2021-02-26 06:23:44	Yes	18-24	Single	Humanities (media, languages, law....etc)	163	51	Yes	Female	Almost	Yes, definitely	Yes, definitely	Almost	Less than 15 hours (about 3 hours per day)	Less than 15 hours (about 3 hours per day)	26-30 hours (approximately 6 hours per day)	Almost	26-30 hours (approximately 6 hours per day)	Less than 15 hours (about 3 hours per day)	Less than 15 hours (about 3 hours per day)	2-3 months	9 hours	Yes	A combination of sitting and standing up	By car or taxi	I don't want to answer	I don't want to answer	5	I don't want to answer	I don't want to answer	I don't want to answer	half an hour	I don't want to answer	I don't know	7	I don't know	2	I don't know	5	I don't know	From an hour to less than two hours	2 to 4 hours	I don't know	2 to 4 hours	I don't know	From an hour to less than two hours	I don't know	Yes	4-5 times a week	4-5 times a week
2021-03-02 22:26:55	Yes	more than 27	Married	Humanities (media, languages, law....etc)	150	50	No	Female	sometimes	no never	Yes, definitely	Yes, definitely	Less than 15 hours (about 3 hours per day)	Less than 15 hours (about 3 hours per day)	26-30 hours (approximately 6 hours per day)	Yes, definitely	15-20 hours (approximately 4 hours per day)	Less than 15 hours (about 3 hours per day)	Less than 15 hours (about 3 hours per day)	less than a month	7 hours	No	Almost standing and walking	By car or taxi	7	7	7	7	4 hours to 8 hours	4 hours to 8 hours	4 hours to 8 hours	4 hours to 8 hours	1	6	2	1	1	I don't know	1	4 hours to 8 hours	more than 8 hours	half an hour	half an hour	half an hour	I don't know	2 to 4 hours	Yes	1-3 times a month	6-7 times a week
2021-03-03 02:55:43	Yes	18-24	Single	Other	173	75	Yes	Male	Yes, definitely	Almost	Almost	sometimes	Less than 15 hours (about 3 hours per day)	Less than 15 hours (about 3 hours per day)	15-20 hours (approximately 4 hours per day)	no never	more than 30 hours (more than 6 hours per day)	Less than 15 hours (about 3 hours per day)	Less than 15 hours (about 3 hours per day)	2-3 months	Less than 5 hours	Yes	A combination of sitting and standing up	By car or taxi	1	1	5	1	From an hour to less than two hours	From an hour to less than two hours	half an hour	From an hour to less than two hours	3	7	1	1	1	7	1	half an hour	From an hour to less than two hours	half an hour	half an hour	half an hour	From an hour to less than two hours	half an hour	Yes	1-3 times a month	4-5 times a week
2021-03-07 15:16:45	Yes	18-24	Single	Humanities (media, languages, law....etc)	151	57	Yes	Female	no never	sometimes	Yes, definitely	Yes, definitely	Less than 15 hours (about 3 hours per day)	Less than 15 hours (about 3 hours per day)	15-20 hours (approximately 4 hours per day)	Almost	15-20 hours (approximately 4 hours per day)	Less than 15 hours (about 3 hours per day)	Less than 15 hours (about 3 hours per day)	2-3 months	Less than 5 hours	Yes	Almost sitting	By car or taxi	I don't know	2 to 6	2	1	half an hour	From an hour to less than two hours	From an hour to less than two hours	From an hour to less than two hours	7	1 to 2	2	1	3	3	1	half an hour	From an hour to less than two hours	half an hour	From an hour to less than two hours	half an hour	From an hour to less than two hours	half an hour	No	1-3 times a month	2-3 times a week
2021-04-16 05:37:19	Yes	more than 27	Married	Health sciences (medicine, pharmacy, applied medical sciences, dentistry)	164	60	No	Female	Almost	Yes, definitely	Yes, definitely	Almost	Less than 15 hours (about 3 hours per day)	Less than 15 hours (about 3 hours per day)	15-20 hours (approximately 4 hours per day)	Yes, definitely	Less than 15 hours (about 3 hours per day)	Less than 15 hours (about 3 hours per day)	Less than 15 hours (about 3 hours per day)	2-3 months	8 hours	Yes	Almost standing and walking	By car or taxi	2	2	1	2	From an hour to less than two hours	half an hour	half an hour	From an hour to less than two hours	2 to 4	4	4	1 to 3	2	3	2 to 4	half an hour, 2 to 4 hours	half an hour, 2 to 4 hours	half an hour, From an hour to less than two hours	half an hour, 2 to 4 hours	half an hour, From an hour to less than two hours, 2 to 4 hours	half an hour, 2 to 4 hours	half an hour, 2 to 4 hours	Yes	once a week	4-5 times a week
[truncated: 17 more columns]
